# Supplementary material for: Copper-catalyzed 1,1-arylalkylation of terminal alkynes with diazo esters and organoboronic acids
Source: Royal Society of Chemistry journal article supplement (doi:10.1039/c9cc07461a), 2019-01-01

*Supporting Information*

**Copper-catalyzed 1,1-aryalkylation of terminal alkynes with diazo  
esters and organoboronic acids**

Yunhe Lv,\* Weiya Pu, Xueru Liu, Jinye Sun and Mengxing Cui

**Table of Contents**

|                                                                                    |            |
|------------------------------------------------------------------------------------|------------|
| <b>1. General Information.....</b>                                                 | <b>S2</b>  |
| <b>2. General Procedure for 1,1-Aryalkylation of Terminal Alkynes.....</b>         | <b>S3</b>  |
| <b>3. Synthetic Applications.....</b>                                              | <b>S3</b>  |
| <b>4. Analytical Data of Compounds 4-7 and 9.....</b>                              | <b>S5</b>  |
| <b>5. Structure Analysis X-Ray Crystallography of 6.....</b>                       | <b>S26</b> |
| <b>6. References.....</b>                                                          | <b>S27</b> |
| <b>7. <sup>1</sup>H and <sup>13</sup>C NMR Spectra of Compounds 4-7 and 9.....</b> | <b>S28</b> |

## 1. General Information

All deuterated solvents were purchased from Cambridge Isotope Laboratories.  $^1\text{H}$  NMR and  $^{13}\text{C}$  NMR spectra were recorded at 25 °C on a Bruker Advance 400 spectrometer ( $^1\text{H}$ : 400 MHz and  $^{13}\text{C}$ :100 MHz).  $^1\text{H}$  NMR chemical shifts were determined relative to internal  $(\text{CH}_3)_4\text{Si}$  (TMS) at  $\delta$  0.00 ppm or to the signal of the residual protonated solvent:  $\text{CDCl}_3$  at  $\delta$  7.26 ppm.  $^{13}\text{C}$  NMR chemical shifts were determined relative to the signal of the solvent:  $\text{CDCl}_3$  at  $\delta$  77.00 ppm. Data for  $^1\text{H}$ ,  $^{13}\text{C}$  NMR were recorded as follows: chemical shift ( $\delta$ , ppm), multiplicity (s = singlet, d = doublet, t = triplet, m = multiplet, q = quartet, dd = doublet of doublets), coupling constants (Hz) and integration. Melting points were obtained with a micro melting point XT4A Beijing Keyi electrooptic apparatus and are uncorrected. High-resolution mass data were recorded on a Waters LCT Premierxe<sup>TM</sup> (USA). Single-crystal X-ray crystallography was carried out on a Bruker Smart Apex II diffractometer system.

### Materials and Methods:

Unless otherwise stated, starting materials were purchased from Aldrich or Energy-Chemical Limited and used as supplied without further purification. Solvents were used directly without further purification. The following starting materials were prepared according to the procedures described previously in the literature: **2b**,<sup>[1]</sup> **2c**,<sup>[2]</sup> **2d**,<sup>[2]</sup> **4a'**,<sup>[3]</sup> and **4a''**.<sup>[4]</sup> The 1,1-aryllkylation of alkynes were performed under a nitrogen atmosphere in flame dried flasks. All reactions were monitored by thin layer chromatography (TLC) with Taizhou GF254 silica gel coated plates. Flash column chromatography was carried out using 200-300 mesh silica gel at increased pressure.

## 2. General Procedure for 1,1-Arylalkylation of Terminal Alkynes

### 4a as an example

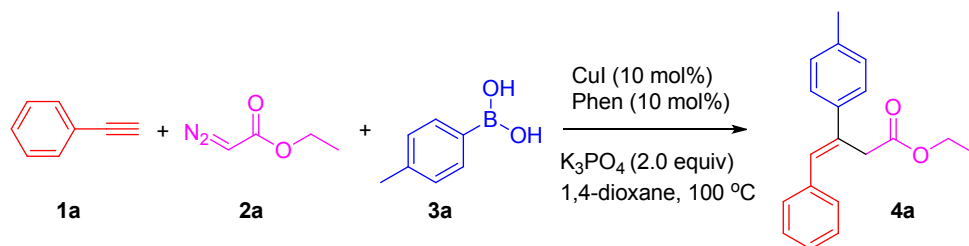

To a solution of the ethyl 2-diazoacetate **2a** (33  $\mu$ L, 0.3 mmol) in 1,4-dioxane (1.0 mL) was added the ethynylbenzene **1a** (41  $\mu$ L, 0.36 mmol), *p*-tolylboronic acid **3a** (124.9 mg, 0.9 mmol), Phen (5.4 mg, 0.03 mmol), CuI (5.7 mg, 0.03 mmol), and K<sub>3</sub>PO<sub>4</sub> (130.0 mg, 0.6 mmol) under a N<sub>2</sub> atmosphere in a Schlenk tube. The reaction mixture was stirred at 100 °C for 1.5 h. After the reaction finished, the reaction mixture was cooled to room temperature and quenched by water. The mixture was extracted with EtOAc (3.0 mL $\times$ 3), the combined organic phases were dried over anhydrous Na<sub>2</sub>SO<sub>4</sub> and the solvent was evaporated under vacuum. The residue was purified by column chromatography to give the corresponding products **4a** (71.0 mg, 85%).

## 3. Synthetic Applications

### 3.1 Hydrolysis of Product 4a

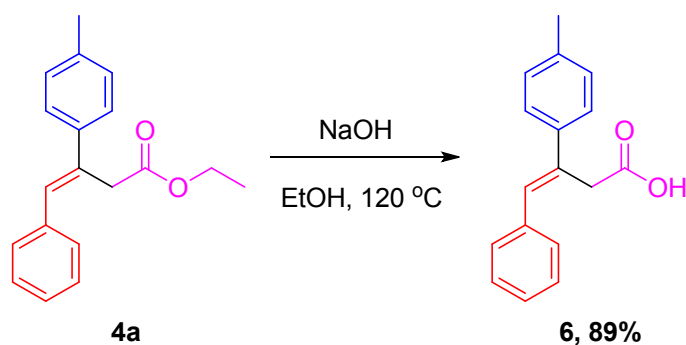

Compound **4a** (56.0 mg, 0.2 mmol) was taken in a Schlenk tube in EtOH (5 mL) with NaOH (0.4 g, 10 mmol). Schlenk tube was tightly closed with teflon cap and heated at 110 °C for 6 h. After completion of the reaction, the mixture was cooled to room temperature. Then 2N HCl was added to the aqueous layer until pH = 2. Next, the aqueous layer was extracted with EtOAc (2 x 20 mL). The organic layer was collected and dried over MgSO<sub>4</sub>. After concentration in vacuum, the residue was purified by column chromatography to give the corresponding products **6** (45.0 mg, 89%).

### 3.2 Synthesis of 7

#### 7a as an example

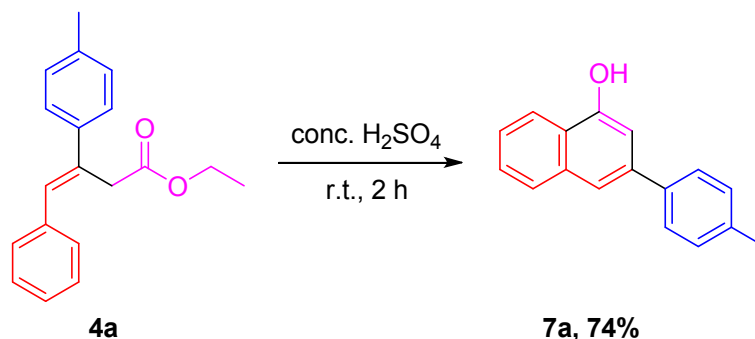

Following the general procedure described previously in the literature,<sup>[5]</sup> (*E*)-ethyl 4-phenyl-3-(*p*-tolyl)but-3-enoate **4a** (84 mg, 0.3 mmol) was dissolved in conc. H<sub>2</sub>SO<sub>4</sub> (300 mg) and stirred at room temperature for 2 h. The reaction mixture was carefully poured over cold water (2 mL). Next, the aqueous layer was extracted with EtOAc (3 x 5 mL), and the product **7a** (52 mg, 74%) was isolated by flash chromatography.

### 3.3 Synthesis of 9

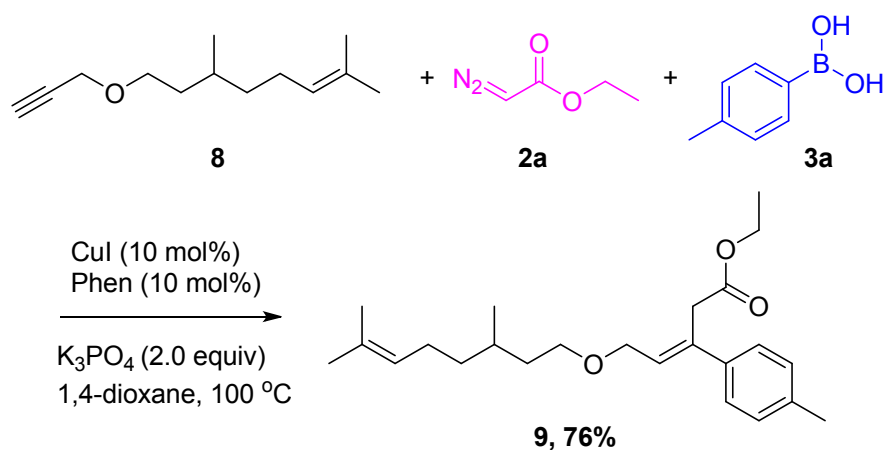

Following the abovementioned general procedure in S2, the reaction with **8** (70 mg, 0.36 mmol), **2a** (33  $\mu$ L, 0.3 mmol), **3a** (124.9 mg, 0.9 mmol), Phen (5.4 mg, 0.03 mmol), CuI (5.7 mg, 0.03 mmol), and K<sub>3</sub>PO<sub>4</sub> (130.0 mg, 0.6 mmol) under a N<sub>2</sub> atmosphere for 1.5 h at 100 °C afforded **9** as colorless oil (85 mg, 76% yield).

#### 4. Analytical Data of Compounds 4-7 and 9

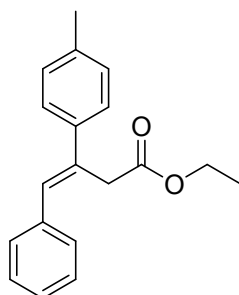

##### **(E)-ethyl 4-phenyl-3-(p-tolyl)but-3-enoate 4a**

Colorless oil.  $^1\text{H NMR}$  (400 MHz,  $\text{CDCl}_3$ ):  $\delta$  = 1.18 (t,  $J$  = 7.2 Hz, 3H), 2.38 (s, 3H), 3.71 (s, 2H), 4.12 (q,  $J$  = 7.2 Hz, 2H), 7.02 (s, 1H), 7.19 (d,  $J$  = 7.6 Hz, 2H), 7.28-7.43 (m, 7H);  $^{13}\text{C NMR}$  (100 MHz,  $\text{CDCl}_3$ ):  $\delta$  = 14.1, 21.1, 36.6, 60.7, 126.0, 127.0, 128.4, 128.7, 129.1, 130.4, 134.5, 137.3, 137.5, 138.7, 171.6. HRMS (ESI-TOF). Calcd for  $\text{C}_{19}\text{H}_{21}\text{O}_2$ ,  $[\text{M}+\text{H}]^+$   $m/z$  281.1542, Found 281.1537.

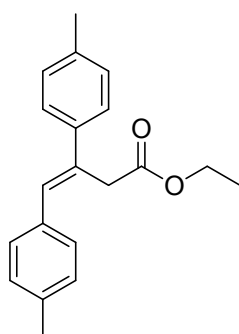

##### **(E)-ethyl 3,4-di-p-tolylbut-3-enoate 4b**

Colorless oil.  $^1\text{H NMR}$  (400 MHz,  $\text{CDCl}_3$ ):  $\delta$  = 1.19 (t,  $J$  = 7.2 Hz, 3H), 2.37 (s, 3H), 2.38 (s, 3H), 3.71 (s, 2H), 4.12 (q,  $J$  = 7.2 Hz, 2H), 6.99 (s, 1H), 7.18 (d,  $J$  = 5.2 Hz, 2H), 7.20 (d,  $J$  = 5.2 Hz, 2H), 7.29 (d,  $J$  = 8.0 Hz, 2H), 7.41 (d,  $J$  = 8.0 Hz, 2H);  $^{13}\text{C NMR}$  (100 MHz,  $\text{CDCl}_3$ ):  $\delta$  = 14.1, 21.1, 21.2, 36.6, 60.7, 126.0, 128.6, 129.1, 129.1, 130.4, 133.8, 134.6, 136.8, 137.2, 138.9, 171.7. HRMS (ESI-TOF). Calcd for  $\text{C}_{20}\text{H}_{23}\text{O}_2$ ,  $[\text{M}+\text{H}]^+$   $m/z$  295.1698, Found 295.1688.

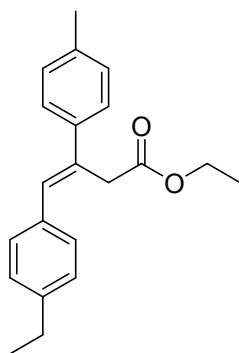

**(E)-ethyl 4-(4-ethylphenyl)-3-(p-tolyl)but-3-enoate 4c**

Colorless oil.  $^1\text{H}$  NMR (400 MHz,  $\text{CDCl}_3$ ):  $\delta$  = 1.18 (t,  $J$  = 7.2 Hz, 3H), 1.26 (t,  $J$  = 7.6 Hz, 3H), 2.37 (s, 3H), 2.67 (q,  $J$  = 7.6 Hz, 2H), 3.71 (s, 2H), 4.11 (q,  $J$  = 7.2 Hz, 2H), 6.98 (s, 1H), 7.17 (d,  $J$  = 8.0 Hz, 2H), 7.21 (d,  $J$  = 8.0 Hz, 2H), 7.31 (d,  $J$  = 8.0 Hz, 2H), 7.40 (d,  $J$  = 8.0 Hz, 2H);  $^{13}\text{C}$  NMR (100 MHz,  $\text{CDCl}_3$ ):  $\delta$  = 14.1, 15.5, 21.1, 28.6, 36.7, 60.7, 126.0, 127.9, 128.7, 129.1, 130.4, 133.9, 134.9, 137.2, 139.0, 143.2, 171.7. HRMS (ESI-TOF). Calcd for  $\text{C}_{21}\text{H}_{24}\text{NaO}_2$ ,  $[\text{M}+\text{Na}]^+$   $m/z$  331.1674, Found 331.1660.

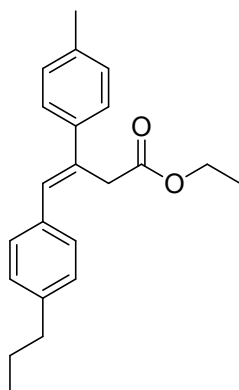

**(E)-ethyl 4-(4-propylphenyl)-3-(p-tolyl)but-3-enoate 4d**

Colorless oil.  $^1\text{H}$  NMR (400 MHz,  $\text{CDCl}_3$ ):  $\delta$  = 0.98 (t,  $J$  = 7.2 Hz, 3H), 1.19 (t,  $J$  = 7.2 Hz, 3H), 1.65-1.70 (m, 2H), 2.37 (s, 3H), 2.62 (t,  $J$  = 7.6 Hz, 2H), 3.73 (s, 2H), 4.12 (q,  $J$  = 7.2 Hz, 2H), 6.99 (s, 1H), 7.18 (d,  $J$  = 6.4 Hz, 2H), 7.20 (d,  $J$  = 6.4 Hz, 2H), 7.31 (d,  $J$  = 8.0 Hz, 2H), 7.41 (d,  $J$  = 8.0 Hz, 2H);  $^{13}\text{C}$  NMR (100 MHz,  $\text{CDCl}_3$ ):  $\delta$  = 13.8, 14.1, 21.1, 24.5, 36.6, 37.8, 60.7, 126.0, 128.5, 128.6, 129.1, 130.4, 133.8, 134.9, 137.2, 138.9, 141.6, 171.7. HRMS (ESI-TOF). Calcd for  $\text{C}_{22}\text{H}_{27}\text{O}_2$ ,  $[\text{M}+\text{H}]^+$   $m/z$  323.2011, Found 323.1998.

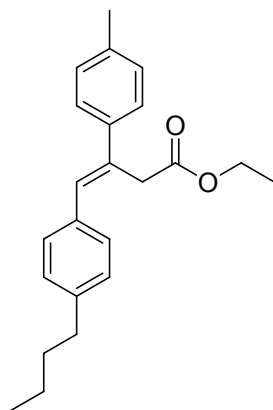

**(E)-ethyl 4-(4-butylphenyl)-3-(p-tolyl)but-3-enoate 4e**

Colorless oil.  $^1\text{H}$  NMR (400 MHz,  $\text{CDCl}_3$ ):  $\delta$  = 0.95 (t,  $J$  = 7.2 Hz, 3H), 1.18 (t,  $J$  = 7.2 Hz, 3H), 1.34-1.43 (m, 2H), 1.58-1.66 (m, 2H), 2.37 (s, 3H), 2.63 (t,  $J$  = 7.6 Hz, 2H), 3.72 (s, 2H), 4.12 (q,  $J$  = 7.2 Hz, 2H), 6.99 (s, 1H), 7.17-7.20 (m, 4H), 7.30 (d,  $J$  = 8.0 Hz, 2H), 7.40 (d,  $J$  = 8.4 Hz, 2H);  $^{13}\text{C}$  NMR (100 MHz,  $\text{CDCl}_3$ ):  $\delta$  = 14.0, 14.1, 21.1, 22.4, 33.6, 35.4, 36.7, 60.7, 126.0, 128.4, 128.7, 129.1, 130.4, 133.8, 134.8, 137.2, 138.9, 141.9, 171.7. HRMS (ESI-TOF). Calcd for  $\text{C}_{23}\text{H}_{29}\text{O}_2$ ,  $[\text{M}+\text{H}]^+$   $m/z$  337.2168, Found 337.2168.

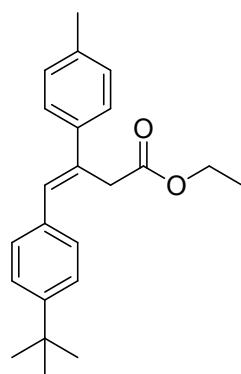

**(E)-ethyl 4-(4-tert-butylphenyl)-3-(p-tolyl)but-3-enoate 4f**

Colorless oil.  $^1\text{H}$  NMR (400 MHz,  $\text{CDCl}_3$ ):  $\delta$  = 1.18 (t,  $J$  = 7.2 Hz, 3H), 1.35 (s, 9H), 2.37 (s, 3H), 3.73 (s, 2H), 4.12 (q,  $J$  = 7.2 Hz, 2H), 6.99 (s, 1H), 7.18 (d,  $J$  = 8.0 Hz, 2H), 7.34 (d,  $J$  = 8.4 Hz, 2H), 7.39-7.42 (m, 4H);  $^{13}\text{C}$  NMR (100 MHz,  $\text{CDCl}_3$ ):  $\delta$  = 14.1, 21.1, 31.3, 34.6, 36.7, 60.7, 125.3, 126.0, 128.5, 129.1, 130.3, 133.9, 134.6, 137.2, 138.9, 150.0, 171.7. HRMS (ESI-TOF). Calcd for  $\text{C}_{23}\text{H}_{29}\text{O}_2$ ,  $[\text{M}+\text{H}]^+$   $m/z$  337.2168, Found 337.2170.

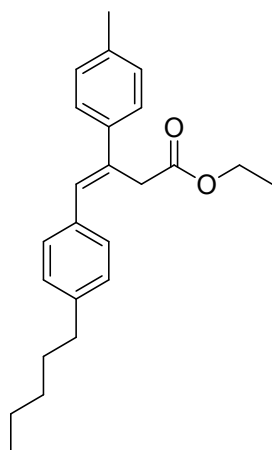

**(E)-ethyl 4-(4-pentylphenyl)-3-(p-tolyl)but-3-enoate 4g**

Colorless oil.  $^1\text{H}$  NMR (400 MHz,  $\text{CDCl}_3$ ):  $\delta$  = 0.91 (t,  $J$  = 6.4 Hz, 3H), 1.18 (t,  $J$  = 7.2 Hz, 3H), 1.28-1.36 (m, 4H), 1.59-1.66 (m, 2H), 2.37 (s, 3H), 2.62 (t,  $J$  = 7.6 Hz, 2H), 3.72 (s, 2H), 4.12 (q,  $J$  = 7.2 Hz, 2H), 6.99 (s, 1H), 7.15-7.20 (m, 4H), 7.30 (d,  $J$  = 7.6 Hz, 2H), 7.40 (d,  $J$  = 7.6 Hz, 2H);  $^{13}\text{C}$  NMR (100 MHz,  $\text{CDCl}_3$ ):  $\delta$  = 14.0, 14.1, 21.1, 22.5, 31.1, 31.5, 35.7, 36.7, 60.7, 126.0, 128.4, 128.7, 129.1, 130.4, 133.8, 134.8, 137.2, 139.0, 141.9, 171.7. HRMS (ESI-TOF). Calcd for  $\text{C}_{24}\text{H}_{30}\text{NaO}_2$ ,  $[\text{M}+\text{Na}]^+$   $m/z$  373.2143, Found 373.2135.

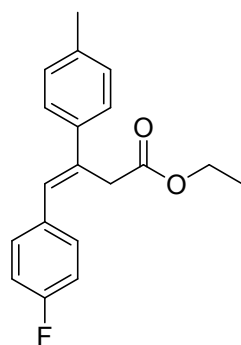

**(E)-ethyl 4-(4-fluorophenyl)-3-(p-tolyl)but-3-enoate 4h**

Colorless oil.  $^1\text{H}$  NMR (400 MHz,  $\text{CDCl}_3$ ):  $\delta$  = 1.18 (t,  $J$  = 7.2 Hz, 3H), 2.37 (s, 3H), 3.65 (s, 2H), 4.11 (q,  $J$  = 7.2 Hz, 2H), 6.95 (s, 1H), 7.06 (t,  $J$  = 8.8 Hz, 2H), 7.18 (d,  $J$  = 8.0 Hz, 2H), 7.34-7.40 (m, 4H);  $^{13}\text{C}$  NMR (100 MHz,  $\text{CDCl}_3$ ):  $\delta$  = 14.1, 21.1, 36.5, 60.8, 115.3 (d,  $J$  = 21.0 Hz), 126.0, 129.2, 129.3, 130.4 (d,  $J$  = 8.0 Hz), 133.6 (d,  $J$  = 4.0 Hz), 134.6, 137.5, 138.5, 161.9 (d,  $J$  = 245.0 Hz), 171.5. HRMS (ESI-TOF). Calcd for  $\text{C}_{19}\text{H}_{20}\text{FO}_2$ ,  $[\text{M}+\text{H}]^+$   $m/z$  299.1447, Found 299.1438.



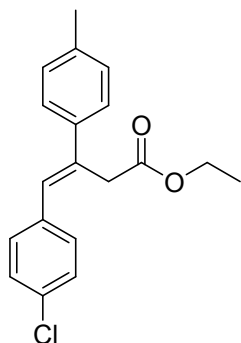

**(E)-ethyl 4-(4-chlorophenyl)-3-(p-tolyl)but-3-enoate 4i**

Colorless oil.  $^1\text{H NMR}$  (400 MHz,  $\text{CDCl}_3$ ):  $\delta$  = 1.18 (t,  $J$  = 7.2 Hz, 3H), 2.37 (s, 3H), 3.65 (s, 2H), 4.11 (q,  $J$  = 7.2 Hz, 2H), 6.94 (s, 1H), 7.18 (d,  $J$  = 8.0 Hz, 2H), 7.31-7.36 (m, 4H), 7.39 (d,  $J$  = 8.0 Hz, 2H);  $^{13}\text{C NMR}$  (100 MHz,  $\text{CDCl}_3$ ):  $\delta$  = 14.1, 21.1, 36.6, 60.9, 126.1, 128.6, 129.1, 129.2, 130.1, 132.9, 135.2, 136.0, 137.6, 138.4, 171.4. HRMS (ESI-TOF). Calcd for  $\text{C}_{19}\text{H}_{20}\text{ClO}_2$ ,  $[\text{M}+\text{H}]^+$   $m/z$  315.1152, Found 315.1148.

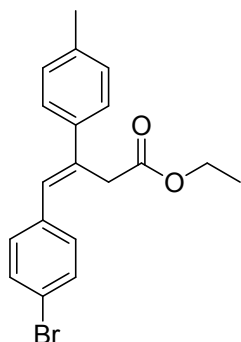

**(E)-ethyl 4-(4-bromophenyl)-3-(p-tolyl)but-3-enoate 4j**

Colorless oil.  $^1\text{H NMR}$  (400 MHz,  $\text{CDCl}_3$ ):  $\delta$  = 1.16 (t,  $J$  = 7.2 Hz, 3H), 2.35 (s, 3H), 3.63 (s, 2H), 4.10 (q,  $J$  = 7.2 Hz, 2H), 6.90 (s, 1H), 7.17 (d,  $J$  = 8.0 Hz, 2H), 7.25 (d,  $J$  = 8.0 Hz, 2H), 7.37 (d,  $J$  = 8.0 Hz, 2H), 7.48 (d,  $J$  = 8.4 Hz, 2H);  $^{13}\text{C NMR}$  (100 MHz,  $\text{CDCl}_3$ ):  $\delta$  = 14.1, 21.1, 36.5, 60.8, 121.0, 126.0, 129.1, 129.2, 130.4, 131.5, 135.2, 136.4, 137.6, 138.3, 171.3. HRMS (ESI-TOF). Calcd for  $\text{C}_{19}\text{H}_{20}\text{BrO}_2$ ,  $[\text{M}+\text{H}]^+$   $m/z$  359.0647, 361.0626, Found 359.0638, 361.0614.

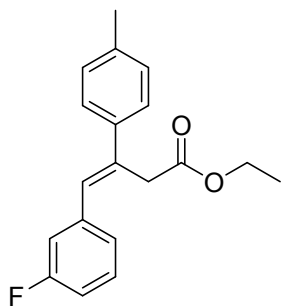

**(E)-ethyl 4-(3-fluorophenyl)-3-(p-tolyl)but-3-enoate 4k**

Colorless oil.  $^1\text{H NMR}$  (400 MHz,  $\text{CDCl}_3$ ):  $\delta$  = 1.19 (t,  $J$  = 7.2 Hz, 3H), 2.38 (s, 3H), 3.69 (s, 2H), 4.13 (q,  $J$  = 7.2 Hz, 2H), 6.96 (s, 1H), 6.98-7.01 (m, 1H), 7.11-7.16 (m, 2H), 7.19 (d,  $J$  = 8.0 Hz, 2H), 7.31-7.37 (m, 1H), 7.40 (d,  $J$  = 8.0 Hz, 2H);  $^{13}\text{C NMR}$  (100 MHz,  $\text{CDCl}_3$ ):  $\delta$  = 14.0, 21.1, 36.6, 60.9, 113.9 (d,  $J$  = 21.0 Hz), 115.5 (d,  $J$  = 22.0 Hz), 124.5 (d,  $J$  = 3.0 Hz), 126.1, 129.1 (d,  $J$  = 2.0 Hz), 129.2, 129.8 (d,  $J$  = 8.0 Hz), 135.6, 137.7, 138.3, 139.7 (d,  $J$  = 7.0 Hz), 162.7 (d,  $J$  = 244.0 Hz), 171.3. HRMS (ESI-TOF). Calcd for  $\text{C}_{19}\text{H}_{20}\text{FO}_2$ ,  $[\text{M}+\text{H}]^+$   $m/z$  299.1447, Found 299.1451.

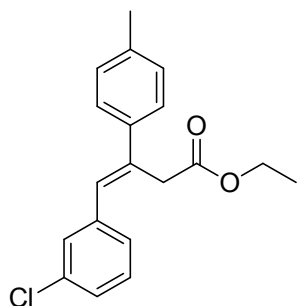

**(E)-ethyl 4-(3-chlorophenyl)-3-(p-tolyl)but-3-enoate 4l**

Colorless oil.  $^1\text{H NMR}$  (400 MHz,  $\text{CDCl}_3$ ):  $\delta$  = 1.19 (t,  $J$  = 7.2 Hz, 3H), 2.36 (s, 3H), 3.65 (s, 2H), 4.11 (q,  $J$  = 7.2 Hz, 2H), 6.92 (s, 1H), 7.18 (d,  $J$  = 8.0 Hz, 2H), 7.24-7.32 (m, 3H), 7.37-7.39 (m, 3H);  $^{13}\text{C NMR}$  (100 MHz,  $\text{CDCl}_3$ ):  $\delta$  = 14.1, 21.1, 36.7, 60.9, 126.1, 126.9, 127.1, 128.8, 128.9, 129.2, 129.6, 134.3, 135.8, 137.7, 138.3, 139.4, 171.2. HRMS (ESI-TOF). Calcd for  $\text{C}_{19}\text{H}_{20}\text{ClO}_2$ ,  $[\text{M}+\text{H}]^+$   $m/z$  315.1152, Found 315.1141.

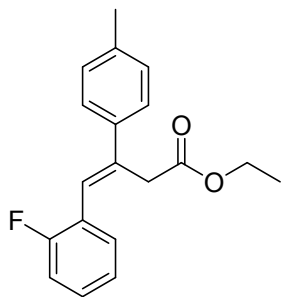

**(E)-ethyl 4-(2-fluorophenyl)-3-(p-tolyl)but-3-enoate 4m**

Colorless oil.  $^1\text{H NMR}$  (400 MHz,  $\text{CDCl}_3$ ):  $\delta$  = 1.16 (t,  $J$  = 7.2 Hz, 3H), 2.37 (s, 3H), 3.65 (s, 2H), 4.09 (q,  $J$  = 7.2 Hz, 2H), 6.95 (s, 1H), 7.06-7.15 (m, 2H), 7.18 (d,  $J$  = 8.0 Hz, 2H), 7.26-7.30 (m, 1H), 7.41 (d,  $J$  = 8.0 Hz, 2H), 7.44-7.47 (m, 1H);  $^{13}\text{C NMR}$  (100 MHz,  $\text{CDCl}_3$ ):  $\delta$  = 14.0, 21.1, 36.8, 60.8, 115.4 (d,  $J$  = 22.0 Hz), 123.1 (d,  $J$  = 4.0 Hz), 123.9 (d,  $J$  = 4.0 Hz), 125.2 (d,  $J$  = 15.0 Hz), 126.1, 128.3, 129.0 (d,  $J$  = 8.0 Hz), 129.1, 130.3 (d,  $J$  = 3.0 Hz), 136.5, 137.9 (d,  $J$  = 65.0 Hz), 160.5 (d,  $J$  = 246.0 Hz), 171.3. HRMS (ESI-TOF). Calcd for  $\text{C}_{19}\text{H}_{20}\text{FO}_2$ ,  $[\text{M}+\text{H}]^+$   $m/z$  299.1447, Found 299.1438.

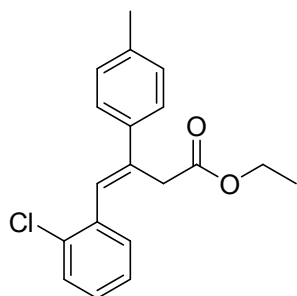

**(E)-ethyl 4-(2-chlorophenyl)-3-(p-tolyl)but-3-enoate 4n**

Colorless oil.  $^1\text{H NMR}$  (400 MHz,  $\text{CDCl}_3$ ):  $\delta$  = 1.16 (t,  $J$  = 7.2 Hz, 3H), 2.37 (s, 3H), 3.60 (s, 2H), 4.09 (q,  $J$  = 7.2 Hz, 2H), 7.02 (s, 1H), 7.19 (d,  $J$  = 8.0 Hz, 2H), 7.22-7.33 (m, 2H), 7.41-7.44 (m, 3H), 7.51 (dd,  $J_1$  = 1.6 Hz,  $J_2$  = 6.8 Hz, 1H);  $^{13}\text{C NMR}$  (100 MHz,  $\text{CDCl}_3$ ):  $\delta$  = 14.0, 21.1, 36.7, 60.8, 126.2, 126.6, 127.6, 128.6, 129.2, 129.4, 130.3, 134.3, 135.7, 135.9, 137.7, 138.1, 171.4. HRMS (ESI-TOF). Calcd for  $\text{C}_{19}\text{H}_{20}\text{ClO}_2$ ,  $[\text{M}+\text{H}]^+$   $m/z$  315.1152, Found 315.1149.

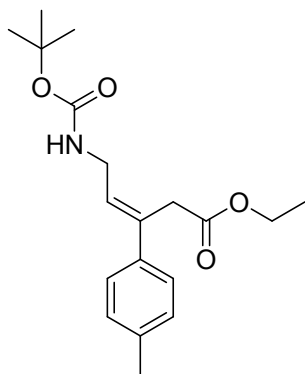

**(E)-ethyl 5-((tert-butoxycarbonyl)amino)-3-(p-tolyl)pent-3-enoate 4o**

Colorless oil.  $^1\text{H NMR}$  (400 MHz,  $\text{CDCl}_3$ ):  $\delta$  = 1.22 (t,  $J$  = 7.2 Hz, 3H), 1.45 (s, 9H), 2.33 (s, 3H), 3.53 (s, 2H), 3.92 (t,  $J$  = 5.6 Hz, 2H), 4.12 (q,  $J$  = 7.2 Hz, 2H), 4.86 (s, 1H), 5.97 (t,  $J$  = 6.8 Hz, 1H), 7.12 (d,  $J$  = 8.0 Hz, 2H), 7.26 (d,  $J$  = 8.0 Hz, 2H);  $^{13}\text{C NMR}$  (100 MHz,  $\text{CDCl}_3$ ):  $\delta$  = 14.1, 21.0, 28.4, 36.0, 38.9, 61.0, 79.3, 125.8, 127.2, 129.1, 135.3, 137.3, 138.4, 155.8, 171.1. HRMS (ESI-TOF). Calcd for  $\text{C}_{19}\text{H}_{28}\text{NO}_4$ ,  $[\text{M}+\text{H}]^+$   $m/z$  334.2018, Found 334.2032.

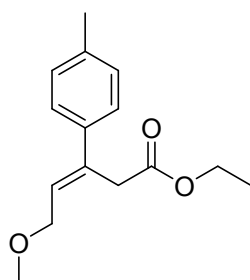

**(E)-ethyl 5-methoxy-3-(p-tolyl)pent-3-enoate 4p**

Colorless oil.  $^1\text{H NMR}$  (400 MHz,  $\text{CDCl}_3$ ):  $\delta$  = 1.19 (t,  $J$  = 7.2 Hz, 3H), 2.33 (s, 3H), 3.39 (s, 3H), 3.52 (s, 2H), 4.10 (q,  $J$  = 7.2 Hz, 2H), 4.16 (d,  $J$  = 6.4 Hz, 2H), 6.07 (t,  $J$  = 6.4 Hz, 1H), 7.13 (d,  $J$  = 8.0 Hz, 2H), 7.31 (d,  $J$  = 8.0 Hz, 2H);  $^{13}\text{C NMR}$  (100 MHz,  $\text{CDCl}_3$ ):  $\delta$  = 14.1, 21.0, 36.4, 58.2, 60.8, 69.4, 125.9, 127.5, 129.0, 135.4, 137.2, 138.5, 170.9. HRMS (ESI-TOF). Calcd for  $\text{C}_{15}\text{H}_{20}\text{NaO}_3$ ,  $[\text{M}+\text{Na}]^+$   $m/z$  271.1310, Found 271.1303.

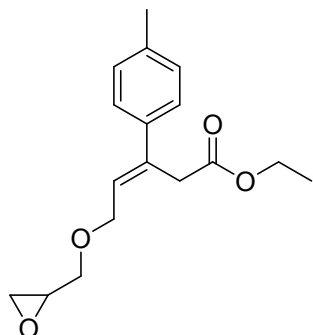

**(E)-ethyl 5-(oxiran-2-ylmethoxy)-3-(p-tolyl)pent-3-enoate 4q**

Colorless oil.  $^1\text{H NMR}$  (400 MHz,  $\text{CDCl}_3$ ):  $\delta$  = 1.19 (t,  $J$  = 7.2 Hz, 3H), 2.33 (s, 3H), 2.63 (dd,  $J_1$  = 2.8 Hz,  $J_2$  = 4.8 Hz, 1H), 2.81 (t,  $J$  = 3.6 Hz, 1H), 3.17-3.19 (m, 1H), 3.44 (dd,  $J_1$  = 6.0 Hz,  $J_2$  = 11.2 Hz, 1H), 3.53 (s, 2H), 3.79 (dd,  $J_1$  = 2.8 Hz,  $J_2$  = 11.2 Hz, 1H), 4.10 (q,  $J$  = 7.2 Hz, 2H), 4.27-4.30 (m, 2H), 6.08 (t,  $J$  = 6.4 Hz, 1H), 7.13 (d,  $J$  = 8.0 Hz, 2H), 7.30 (d,  $J$  = 8.4 Hz, 2H);  $^{13}\text{C NMR}$  (100 MHz,  $\text{CDCl}_3$ ):  $\delta$  = 14.1, 21.0, 36.4, 44.2, 50.8, 60.8, 68.1, 70.9, 125.9, 127.1, 129.0, 135.7, 137.3, 138.4, 170.8. HRMS (ESI-TOF). Calcd for  $\text{C}_{17}\text{H}_{22}\text{NaO}_4$ ,  $[\text{M}+\text{Na}]^+$   $m/z$  313.1416, Found 313.1418.

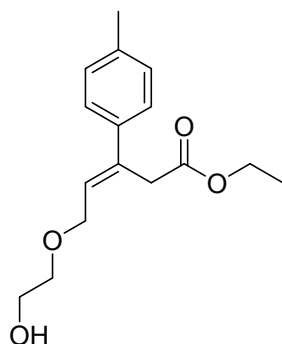

**(E)-ethyl 5-(2-hydroxyethoxy)-3-(p-tolyl)pent-3-enoate 4r**

Colorless oil.  $^1\text{H NMR}$  (400 MHz,  $\text{CDCl}_3$ ):  $\delta$  = 1.19 (t,  $J$  = 7.2 Hz, 3H), 2.27 (s, 1H), 2.34 (s, 3H), 3.53 (s, 2H), 3.62 (t,  $J$  = 4.4 Hz, 2H), 3.76 (t,  $J$  = 4.4 Hz, 2H), 4.10 (q,  $J$  = 7.2 Hz, 2H), 4.26 (d,  $J$  = 6.4 Hz, 2H), 6.09 (t,  $J$  = 6.4 Hz, 1H), 7.13 (d,  $J$  = 8.0 Hz, 2H), 7.30 (d,  $J$  = 8.4 Hz, 2H);  $^{13}\text{C NMR}$  (100 MHz,  $\text{CDCl}_3$ ):  $\delta$  = 14.1, 21.1, 36.5, 60.9, 61.9, 68.0, 71.6, 125.9, 127.1, 129.1, 136.0, 137.4, 138.4, 171.0. HRMS (ESI-TOF). Calcd for  $\text{C}_{16}\text{H}_{23}\text{O}_4$ ,  $[\text{M}+\text{H}]^+$   $m/z$  279.1596, Found 279.1589.

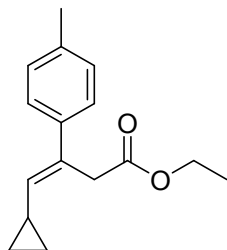

**(E)-ethyl 4-cyclopropyl-3-(p-tolyl)but-3-enoate 4s**

Colorless oil.  $^1\text{H NMR}$  (400 MHz,  $\text{CDCl}_3$ ):  $\delta$  = 0.48-0.51 (m, 2H), 0.85-0.87 (m, 2H), 1.21 (t,  $J$  = 7.2 Hz, 3H), 1.60-1.67 (m, 1H), 2.32 (s, 3H), 3.62 (s, 2H), 4.13 (q,  $J$  = 7.2 Hz, 2H), 5.32 (d,  $J$  = 9.6 Hz, 1H), 7.10 (d,  $J$  = 8.0 Hz, 2H), 7.25 (d,  $J$  = 8.4 Hz, 2H);  $^{13}\text{C NMR}$  (100 MHz,  $\text{CDCl}_3$ ):  $\delta$  = 7.5, 11.3, 14.1, 21.0, 36.4, 60.6, 125.4, 128.9, 130.7, 135.7, 136.2, 139.2, 171.7. HRMS (ESI-TOF). Calcd for  $\text{C}_{16}\text{H}_{21}\text{O}_2$ ,  $[\text{M}+\text{H}]^+$   $m/z$  245.1542, Found 245.1538.

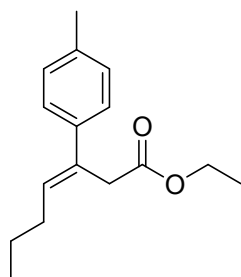

**(E)-ethyl 3-(p-tolyl)hept-3-enoate 4t**

Colorless oil.  $^1\text{H NMR}$  (400 MHz,  $\text{CDCl}_3$ ):  $\delta$  = 0.96 (t,  $J$  = 7.2 Hz, 3H), 1.19 (t,  $J$  = 7.2 Hz, 3H), 1.47-1.52 (m, 2H), 2.19 (q,  $J$  = 7.2 Hz, 2H), 2.32 (s, 3H), 3.49 (s, 2H), 4.09 (q,  $J$  = 7.2 Hz, 2H), 5.91 (t,  $J$  = 7.2 Hz, 1H), 7.11 (d,  $J$  = 8.0 Hz, 2H), 7.27 (d,  $J$  = 8.0 Hz, 2H);  $^{13}\text{C NMR}$  (100 MHz,  $\text{CDCl}_3$ ):  $\delta$  = 13.9, 14.1, 21.0, 22.7, 31.0, 36.1, 60.6, 125.8, 128.9, 131.8, 132.3, 136.4, 139.6, 171.5. HRMS (ESI-TOF). Calcd for  $\text{C}_{16}\text{H}_{23}\text{O}_2$ ,  $[\text{M}+\text{H}]^+$   $m/z$  247.1698, Found 247.1690.

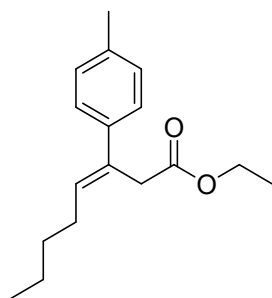

**(E)-ethyl 3-(p-tolyl)oct-3-enoate 4u**

Colorless oil.  $^1\text{H}$  NMR (400 MHz,  $\text{CDCl}_3$ ):  $\delta$  = 0.92 (t,  $J$  = 7.2 Hz, 3H), 1.18 (t,  $J$  = 7.2 Hz, 3H), 1.35-1.47 (m, 4H), 2.21 (q,  $J$  = 7.2 Hz, 2H), 2.32 (s, 3H), 3.49 (s, 2H), 4.09 (q,  $J$  = 7.2 Hz, 2H), 5.91 (t,  $J$  = 7.2 Hz, 1H), 7.11 (d,  $J$  = 8.0 Hz, 2H), 7.26 (d,  $J$  = 8.0 Hz, 2H);  $^{13}\text{C}$  NMR (100 MHz,  $\text{CDCl}_3$ ):  $\delta$  = 14.0, 14.1, 21.0, 22.4, 28.7, 31.6, 36.0, 60.6, 125.8, 128.9, 132.0, 132.0, 136.4, 139.5, 171.6. HRMS (ESI-TOF). Calcd for  $\text{C}_{17}\text{H}_{25}\text{O}_2$ ,  $[\text{M}+\text{H}]^+$   $m/z$  261.1855, Found 261.1846.

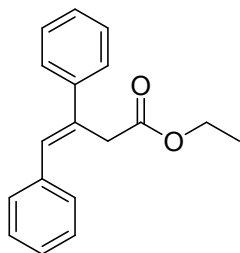

**(E)-ethyl 3-(4-ethylphenyl)-4-phenylbut-3-enoate 5a**

Colorless oil.  $^1\text{H}$  NMR (400 MHz,  $\text{CDCl}_3$ ):  $\delta$  = 1.17 (t,  $J$  = 7.2 Hz, 3H), 3.72 (s, 2H), 4.12 (q,  $J$  = 7.2 Hz, 2H), 7.04 (s, 1H), 7.28-7.40 (m, 8H), 7.51-7.53 (m, 2H);  $^{13}\text{C}$  NMR (100 MHz,  $\text{CDCl}_3$ ):  $\delta$  = 14.0, 36.7, 60.7, 126.3, 127.2, 127.5, 128.4, 128.4, 128.7, 131.2, 134.7, 137.4, 141.7, 171.5. HRMS (ESI-TOF). Calcd for  $\text{C}_{18}\text{H}_{19}\text{O}_2$ ,  $[\text{M}+\text{H}]^+$   $m/z$  267.1385, Found 267.1378.

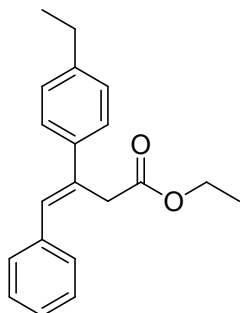

**(E)-ethyl 3-(4-ethylphenyl)-4-phenylbut-3-enoate 5b**

Colorless oil.  $^1\text{H}$  NMR (400 MHz,  $\text{CDCl}_3$ ):  $\delta$  = 1.17 (t,  $J$  = 7.2 Hz, 3H), 1.26 (t,  $J$  = 7.6 Hz, 3H), 2.67 (q,  $J$  = 7.6 Hz, 2H), 3.70 (s, 2H), 4.11 (q,  $J$  = 7.2 Hz, 2H), 7.02 (s, 1H), 7.20 (d,  $J$  = 8.4 Hz, 2H), 7.27-7.39 (m, 5H), 7.43 (d,  $J$  = 8.4 Hz, 2H);  $^{13}\text{C}$  NMR (100 MHz,  $\text{CDCl}_3$ ):  $\delta$  = 14.1, 15.5, 28.5, 36.7, 60.7, 126.1, 127.1, 127.9, 128.4, 128.7, 130.5, 134.5, 137.6, 139.0, 143.7, 171.6. HRMS (ESI-TOF). Calcd for  $\text{C}_{20}\text{H}_{23}\text{O}_2$ ,  $[\text{M}+\text{H}]^+$   $m/z$  295.1698, Found 295.1701.

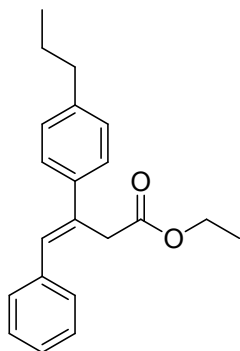

**(E)-ethyl 4-phenyl-3-(4-propylphenyl)but-3-enoate 5c**

Colorless oil.  $^1\text{H}$  NMR (400 MHz,  $\text{CDCl}_3$ ):  $\delta$  = 0.96 (t,  $J$  = 7.2 Hz, 3H), 1.16 (t,  $J$  = 7.2 Hz, 3H), 1.63-1.69 (m, 2H), 2.60 (t,  $J$  = 7.6 Hz, 2H), 3.70 (s, 2H), 4.11 (q,  $J$  = 7.2 Hz, 2H), 7.03 (s, 1H), 7.18 (d,  $J$  = 8.0 Hz, 2H), 7.27-7.39 (m, 5H), 7.42 (d,  $J$  = 8.4 Hz, 2H);  $^{13}\text{C}$  NMR (100 MHz,  $\text{CDCl}_3$ ):  $\delta$  = 13.8, 14.1, 24.5, 36.6, 37.7, 60.7, 126.0, 127.0, 128.4, 128.5, 128.7, 130.4, 134.5, 137.6, 139.0, 142.2, 171.6. HRMS (ESI-TOF). Calcd for  $\text{C}_{21}\text{H}_{25}\text{O}_2$ ,  $[\text{M}+\text{H}]^+$   $m/z$  309.1855, Found 309.1847.

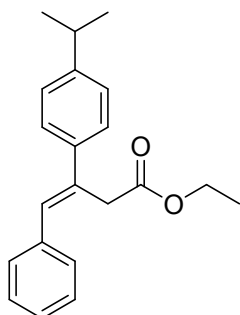

**(E)-ethyl 3-(4-isopropylphenyl)-4-phenylbut-3-enoate 5d**

Colorless oil.  $^1\text{H}$  NMR (400 MHz,  $\text{CDCl}_3$ ):  $\delta$  = 1.15 (t,  $J$  = 7.2 Hz, 3H), 1.26 (d,  $J$  = 7.2 Hz, 6H), 2.85-2.95 (m, 1H), 3.69 (s, 2H), 4.10 (q,  $J$  = 7.2 Hz, 2H), 7.02 (s, 1H), 7.22 (d,  $J$  = 8.4 Hz, 2H), 7.25-7.38 (m, 5H), 7.43 (d,  $J$  = 8.0 Hz, 2H);  $^{13}\text{C}$  NMR (100 MHz,  $\text{CDCl}_3$ ):  $\delta$  = 14.0, 23.9, 33.7, 36.6, 60.7, 126.1, 126.5, 127.0, 128.3, 128.7, 130.4, 134.4, 137.5, 139.0, 148.3, 171.6. HRMS (ESI-TOF). Calcd for  $\text{C}_{21}\text{H}_{25}\text{O}_2$ ,  $[\text{M}+\text{H}]^+$   $m/z$  309.1855, Found 309.1846.



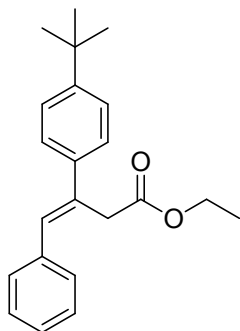

**(E)-ethyl 3-(4-(*tert*-butyl)phenyl)-4-phenylbut-3-enoate 5e**

Colorless oil.  $^1\text{H NMR}$  (400 MHz,  $\text{CDCl}_3$ ):  $\delta$  = 1.17 (t,  $J$  = 7.2 Hz, 3H), 1.34 (s, 9H), 3.70 (s, 2H), 4.12 (q,  $J$  = 7.2 Hz, 2H), 7.04 (s, 1H), 7.27-7.40 (m, 7H), 7.45 (d,  $J$  = 8.8 Hz, 2H);  $^{13}\text{C NMR}$  (100 MHz,  $\text{CDCl}_3$ ):  $\delta$  = 14.1, 31.3, 34.5, 36.6, 60.7, 125.4, 125.8, 127.1, 128.4, 128.8, 130.5, 134.4, 137.6, 138.7, 150.6, 171.6. HRMS (ESI-TOF). Calcd for  $\text{C}_{22}\text{H}_{27}\text{O}_2$ ,  $[\text{M}+\text{H}]^+$   $m/z$  323.2011, Found 323.1996.

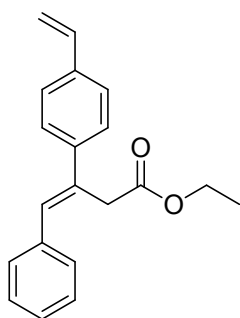

**(E)-ethyl 4-phenyl-3-(4-vinylphenyl)but-3-enoate 5f**

Colorless oil.  $^1\text{H NMR}$  (400 MHz,  $\text{CDCl}_3$ ):  $\delta$  = 1.18 (t,  $J$  = 7.2 Hz, 3H), 3.72 (s, 2H), 4.12 (q,  $J$  = 7.2 Hz, 2H), 5.27 (d,  $J$  = 10.8 Hz, 1H), 5.78 (d,  $J$  = 17.6 Hz, 1H), 6.74 (dd,  $J_1$  = 10.8 Hz,  $J_2$  = 17.6 Hz, 1H), 7.07 (s, 1H), 7.29-7.32 (m, 1H), 7.37-7.43 (m, 6H), 7.48 (d,  $J$  = 8.4 Hz, 2H);  $^{13}\text{C NMR}$  (100 MHz,  $\text{CDCl}_3$ ):  $\delta$  = 14.1, 36.5, 60.8, 113.8, 126.3, 127.2, 128.4, 128.8, 131.0, 134.2, 136.4, 136.9, 137.4, 141.0, 171.5. HRMS (ESI-TOF). Calcd for  $\text{C}_{20}\text{H}_{21}\text{O}_2$ ,  $[\text{M}+\text{H}]^+$   $m/z$  293.1542, Found 293.1530.

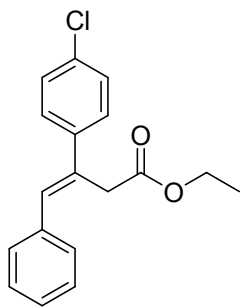

**(E)-ethyl 3-(4-chlorophenyl)-4-phenylbut-3-enoate 5g**

Colorless oil.  $^1\text{H}$  NMR (400 MHz,  $\text{CDCl}_3$ ):  $\delta$  = 1.17 (t,  $J$  = 7.2 Hz, 3H), 3.68 (s, 2H), 4.11 (q,  $J$  = 7.2 Hz, 2H), 7.00 (s, 1H), 7.30-7.39 (m, 7H), 7.43 (d,  $J$  = 8.4 Hz, 2H);  $^{13}\text{C}$  NMR (100 MHz,  $\text{CDCl}_3$ ):  $\delta$  = 14.1, 36.6, 60.9, 127.4, 127.6, 128.5, 128.6, 128.7, 131.7, 133.4, 133.6, 137.1, 140.2, 171.3. HRMS (ESI-TOF). Calcd for  $\text{C}_{18}\text{H}_{18}\text{ClO}_2$ ,  $[\text{M}+\text{H}]^+$   $m/z$  301.0995, Found 301.0992.

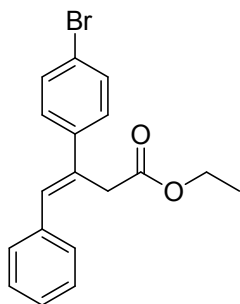

**(E)-ethyl 3-(4-bromophenyl)-4-phenylbut-3-enoate 5h**

Colorless oil.  $^1\text{H}$  NMR (400 MHz,  $\text{CDCl}_3$ ):  $\delta$  = 1.18 (t,  $J$  = 7.2 Hz, 3H), 3.68 (s, 2H), 4.11 (q,  $J$  = 7.2 Hz, 2H), 7.01 (s, 1H), 7.29-7.41 (m, 7H), 7.50 (d,  $J$  = 8.8 Hz, 2H);  $^{13}\text{C}$  NMR (100 MHz,  $\text{CDCl}_3$ ):  $\delta$  = 14.1, 36.5, 60.9, 121.5, 127.4, 127.9, 128.4, 128.7, 131.5, 131.7, 133.6, 137.0, 140.6, 171.2. HRMS (ESI-TOF). Calcd for  $\text{C}_{18}\text{H}_{18}\text{BrO}_2$ ,  $[\text{M}+\text{H}]^+$   $m/z$  345.0490, 347.0470, Found 345.0486, 347.0462.

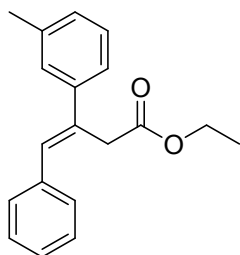

**(E)-ethyl 4-phenyl-3-(*m*-tolyl)but-3-enoate 5i**

Colorless oil.  $^1\text{H}$  NMR (400 MHz,  $\text{CDCl}_3$ ):  $\delta$  = 1.17 (t,  $J$  = 7.2 Hz, 3H), 2.39 (s, 3H), 3.70 (s, 2H), 4.11 (q,  $J$  = 7.2 Hz, 2H), 7.02 (s, 1H), 7.12 (d,  $J$  = 7.2 Hz, 1H), 7.24-7.32 (m, 4H), 7.38 (d,  $J$  = 4.0 Hz, 4H);  $^{13}\text{C}$  NMR (100 MHz,  $\text{CDCl}_3$ ):  $\delta$  = 14.1, 21.5, 36.7, 60.7, 123.3, 127.0, 127.1, 128.3, 128.3, 128.4, 128.7, 131.0, 134.8, 137.5, 138.0, 141.7, 171.6. HRMS (ESI-TOF). Calcd for  $\text{C}_{19}\text{H}_{21}\text{O}_2$ ,  $[\text{M}+\text{H}]^+$   $m/z$  281.1542, Found 281.1540.

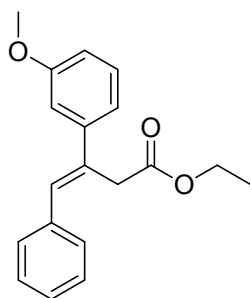

**(E)-ethyl 3-(3-methoxyphenyl)-4-phenylbut-3-enoate 5j**

Colorless oil.  $^1\text{H}$  NMR (400 MHz,  $\text{CDCl}_3$ ):  $\delta$  = 1.17 (t,  $J$  = 7.2 Hz, 3H), 3.69 (s, 2H), 3.84 (s, 3H), 4.11 (q,  $J$  = 7.2 Hz, 2H), 6.84-6.87 (m, 1H), 7.04-7.10 (m, 3H), 7.26-7.31 (m, 2H), 7.38 (d,  $J$  = 4.4 Hz, 4H);  $^{13}\text{C}$  NMR (100 MHz,  $\text{CDCl}_3$ ):  $\delta$  = 14.1, 36.8, 55.3, 60.8, 112.1, 113.0, 118.7, 127.2, 128.4, 128.7, 129.4, 131.3, 134.6, 137.3, 143.3, 159.7, 171.5. HRMS (ESI-TOF). Calcd for  $\text{C}_{19}\text{H}_{21}\text{O}_3$ ,  $[\text{M}+\text{H}]^+$   $m/z$  297.1491, Found 297.1490.

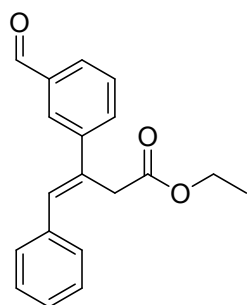

**(E)-ethyl 3-(3-formylphenyl)-4-phenylbut-3-enoate 5k**

Colorless oil.  $^1\text{H}$  NMR (400 MHz,  $\text{CDCl}_3$ ):  $\delta$  = 1.16 (t,  $J$  = 7.2 Hz, 3H), 3.74 (s, 2H), 4.11 (q,  $J$  = 7.2 Hz, 2H), 7.09 (s, 1H), 7.30-7.40 (m, 5H), 7.55 (t,  $J$  = 7.6 Hz, 1H), 7.77 (d,  $J$  = 8.0 Hz, 1H), 7.82 (d,  $J$  = 7.2 Hz, 1H), 8.01 (s, 1H), 10.06 (s, 1H);  $^{13}\text{C}$  NMR (100 MHz,  $\text{CDCl}_3$ ):  $\delta$  = 14.1, 36.6, 60.9, 127.5, 127.6, 128.5, 128.7, 128.8, 129.2, 132.3, 132.7, 133.6, 136.6, 136.9, 142.8, 171.1, 192.2. HRMS (ESI-TOF). Calcd for  $\text{C}_{19}\text{H}_{19}\text{O}_3$ ,  $[\text{M}+\text{H}]^+$   $m/z$  295.1334, Found 295.1326.

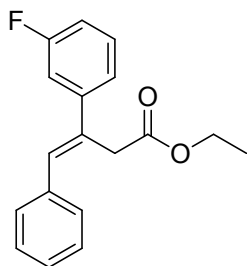

**(E)-ethyl 3-(3-fluorophenyl)-4-phenylbut-3-enoate 5l**

Colorless oil.  $^1\text{H}$  NMR (400 MHz,  $\text{CDCl}_3$ ):  $\delta$  = 1.17 (t,  $J$  = 7.2 Hz, 3H), 3.68 (s, 2H), 4.12 (q,  $J$  = 7.2 Hz, 2H), 6.97-7.02 (m, 1H), 7.04 (s, 1H), 7.19-7.22 (m, 1H), 7.28-7.39 (m, 7H);  $^{13}\text{C}$  NMR (100 MHz,  $\text{CDCl}_3$ ):  $\delta$  = 14.1, 36.6, 60.9, 113.3 (d,  $J$  = 22.0 Hz), 114.4 (d,  $J$  = 21.0 Hz), 121.9 (d,  $J$  = 3.0 Hz), 127.5, 128.5, 128.8, 129.9 (d,  $J$  = 8.0 Hz), 132.1, 133.7 (d,  $J$  = 2.0 Hz), 137.0, 144.1 (d,  $J$  = 7.0 Hz), 163.0 (d,  $J$  = 244.0 Hz), 171.2. HRMS (ESI-TOF). Calcd for  $\text{C}_{18}\text{H}_{18}\text{FO}_2$ ,  $[\text{M}+\text{H}]^+$   $m/z$  285.1291, Found 285.1295.

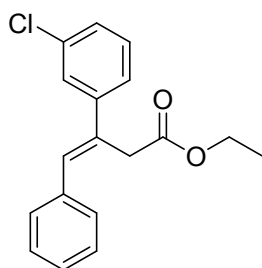

**(E)-ethyl 3-(3-chlorophenyl)-4-phenylbut-3-enoate 5m**

Colorless oil.  $^1\text{H}$  NMR (400 MHz,  $\text{CDCl}_3$ ):  $\delta$  = 1.18 (t,  $J$  = 7.2 Hz, 3H), 3.68 (s, 2H), 4.12 (q,  $J$  = 7.2 Hz, 2H), 7.02 (s, 1H), 7.27-7.41 (m, 8H), 7.49 (s, 1H);  $^{13}\text{C}$  NMR (100 MHz,  $\text{CDCl}_3$ ):  $\delta$  = 14.1, 36.6, 60.9, 124.4, 126.5, 127.5, 127.6, 128.5, 128.7, 129.7, 132.3, 133.5, 134.4, 136.9, 143.6, 171.2. HRMS (ESI-TOF). Calcd for  $\text{C}_{18}\text{H}_{18}\text{ClO}_2$ ,  $[\text{M}+\text{H}]^+$   $m/z$  301.0995, Found 301.0992.

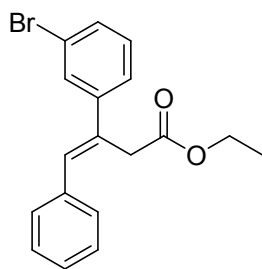

**(E)-ethyl 3-(3-bromophenyl)-4-phenylbut-3-enoate 5n**

Colorless oil.  $^1\text{H}$  NMR (400 MHz,  $\text{CDCl}_3$ ):  $\delta$  = 1.18 (t,  $J$  = 7.2 Hz, 3H), 3.67 (s, 2H), 4.12 (q,  $J$  = 7.2 Hz, 2H), 7.01 (s, 1H), 7.22-7.32 (m, 2H), 7.36-7.44 (m, 6H), 7.65 (t,  $J$  = 1.6 Hz, 1H);  $^{13}\text{C}$  NMR (100 MHz,  $\text{CDCl}_3$ ):  $\delta$  = 14.1, 36.6, 60.9, 122.6, 124.9, 127.5, 128.5, 128.7, 129.5, 129.9, 130.5, 132.4, 133.5, 136.9, 144.0, 171.1. HRMS (ESI-TOF). Calcd for  $\text{C}_{18}\text{H}_{18}\text{BrO}_2$ ,  $[\text{M}+\text{H}]^+$   $m/z$  345.0490, 347.0470, Found 345.0479, 347.0460.

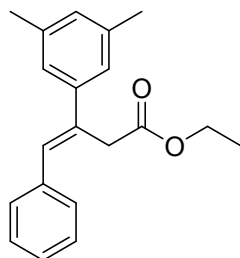

**(E)-ethyl 3-(3,5-dimethylphenyl)-4-phenylbut-3-enoate 5o**

Colorless oil.  $^1\text{H}$  NMR (400 MHz,  $\text{CDCl}_3$ ):  $\delta$  = 1.19 (t,  $J$  = 7.2 Hz, 3H), 2.35 (s, 6H), 3.70 (s, 2H), 4.13 (q,  $J$  = 7.2 Hz, 2H), 6.96 (s, 1H), 7.02 (s, 1H), 7.13 (s, 2H), 7.28-7.31 (s, 1H), 7.39 (d,  $J$  = 4.4 Hz, 4H);  $^{13}\text{C}$  NMR (100 MHz,  $\text{CDCl}_3$ ):  $\delta$  = 14.1, 21.4, 36.7, 60.7, 124.1, 127.0, 128.4, 128.7, 129.3, 130.8, 134.8, 137.6, 137.8, 141.7, 171.6. HRMS (ESI-TOF). Calcd for  $\text{C}_{20}\text{H}_{23}\text{O}_2$ ,  $[\text{M}+\text{H}]^+$   $m/z$  295.1698, Found 295.1692.

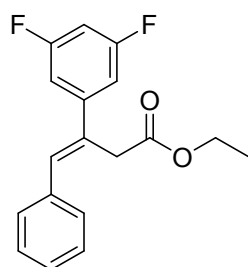

**(E)-ethyl 3-(3,5-difluorophenyl)-4-phenylbut-3-enoate 5p**

Colorless oil.  $^1\text{H}$  NMR (400 MHz,  $\text{CDCl}_3$ ):  $\delta$  = 1.20 (t,  $J$  = 7.2 Hz, 3H), 3.65 (s, 2H), 4.14 (q,  $J$  = 7.2 Hz, 2H), 6.73-6.77 (s, 1H), 7.01-7.06 (s, 3H), 7.30-7.42 (s, 5H);  $^{13}\text{C}$  NMR (100 MHz,  $\text{CDCl}_3$ ):  $\delta$  = 14.1, 36.5, 61.0, 102.8 (t,  $J$  = 26.0 Hz), 109.2 (dd,  $J_1$  = 8.0 Hz,  $J_2$  = 19.0 Hz), 127.7, 128.5, 128.7, 132.8 (t,  $J$  = 3.0 Hz), 133.0, 136.6, 145.3 (t,  $J$  = 10.0 Hz), 163.1 (dd,  $J_1$  = 13.0 Hz,  $J_2$  = 246.0 Hz), 171.0. HRMS (ESI-TOF). Calcd for  $\text{C}_{18}\text{H}_{17}\text{F}_2\text{O}_2$ ,  $[\text{M}+\text{H}]^+$   $m/z$  303.1197, Found 303.1191.

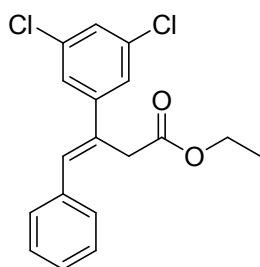

**(E)-ethyl 3-(3,5-dichlorophenyl)-4-phenylbut-3-enoate 5q**

Colorless oil.  $^1\text{H}$  NMR (400 MHz,  $\text{CDCl}_3$ ):  $\delta$  = 1.20 (t,  $J$  = 7.2 Hz, 3H), 3.64 (s, 2H), 4.14 (q,  $J$  = 7.2 Hz, 2H), 7.02 (s, 1H), 7.29-7.41 (s, 8H);  $^{13}\text{C}$  NMR (100 MHz,  $\text{CDCl}_3$ ):  $\delta$  = 14.1, 36.5, 61.0, 124.9, 127.4, 127.7, 128.5, 128.7, 132.5, 133.3, 135.0, 136.5, 144.9, 170.9. HRMS (ESI-TOF). Calcd for  $\text{C}_{18}\text{H}_{17}\text{Cl}_2\text{O}_2$ ,  $[\text{M}+\text{H}]^+$   $m/z$  335.0606, Found 335.0601.

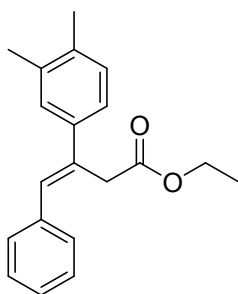

**(E)-ethyl 3-(3,4-dimethylphenyl)-4-phenylbut-3-enoate 5r**

Colorless oil.  $^1\text{H}$  NMR (400 MHz,  $\text{CDCl}_3$ ):  $\delta$  = 1.19 (t,  $J$  = 7.2 Hz, 3H), 2.28 (s, 3H), 2.30 (s, 3H), 3.69 (s, 2H), 4.12 (q,  $J$  = 7.2 Hz, 2H), 7.00 (s, 1H), 7.13 (d,  $J$  = 8.0 Hz, 1H), 7.22-7.29 (s, 3H), 7.38 (d,  $J$  = 4.8 Hz, 4H);  $^{13}\text{C}$  NMR (100 MHz,  $\text{CDCl}_3$ ):  $\delta$  = 14.1, 19.4, 19.9, 36.6, 60.7, 123.6, 127.0, 127.5, 128.4, 128.7, 129.7, 130.3, 134.6, 136.1, 136.5, 137.6, 139.3, 171.6. HRMS (ESI-TOF). Calcd for  $\text{C}_{20}\text{H}_{23}\text{O}_2$ ,  $[\text{M}+\text{H}]^+$   $m/z$  295.1698, Found 295.1692.

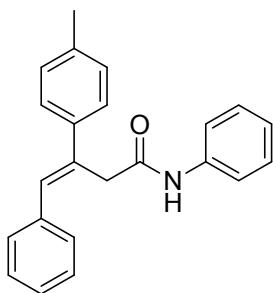

**(E)-N,4-diphenyl-3-(p-tolyl)but-3-enamide 5s**

White solid. mp: 178-179 °C. <sup>1</sup>H NMR (400 MHz, CDCl<sub>3</sub>): δ = 2.38 (s, 3H), 3.83 (s, 2H), 7.07 (t, *J* = 7.2 Hz, 1H), 7.17 (s, 1H), 7.23 (d, *J* = 8.4 Hz, 2H), 7.28-7.42 (m, 10H), 7.49 (d, *J* = 8.0 Hz, 2H); <sup>13</sup>C NMR (100 MHz, CDCl<sub>3</sub>): δ = 21.1, 40.0, 119.8, 124.4, 126.0, 127.6, 128.7, 128.8, 128.9, 129.7, 131.7, 134.6, 136.8, 137.6, 138.2, 138.4, 168.5. HRMS (ESI-TOF). Calcd for C<sub>23</sub>H<sub>22</sub>NO, [M+H]<sup>+</sup> *m/z* 328.1701, Found 328.1697.

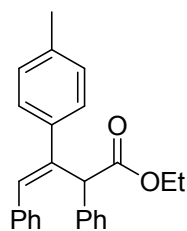

**(E)-ethyl 2,4-diphenyl-3-(p-tolyl)but-3-enoate 5t**

Colorless oil. <sup>1</sup>H NMR (400 MHz, CDCl<sub>3</sub>): δ = 1.06 (t, *J* = 7.2 Hz, 3H), 2.31 (s, 3H), 4.03-4.09 (m, 2H), 5.35 (s, 1H), 7.01-7.06 (s, 3H), 7.20-7.36 (m, 12H); <sup>13</sup>C NMR (100 MHz, CDCl<sub>3</sub>): δ = 13.9, 21.1, 52.5, 60.9, 126.9, 127.2, 128.0, 128.1, 128.4, 128.5, 128.7, 129.3, 132.0, 137.0, 137.1, 137.2, 138.1, 138.7, 172.2. HRMS (ESI-TOF). Calcd for C<sub>25</sub>H<sub>25</sub>O<sub>2</sub>, [M+H]<sup>+</sup> *m/z* 357.1855, Found 357.1846.

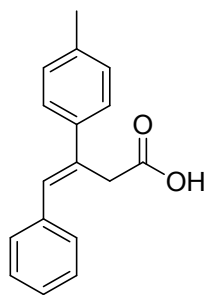

**(E)-4-phenyl-3-(p-tolyl)but-3-enoic acid 6**

White solid. mp: 154-155 °C. <sup>1</sup>H NMR (400 MHz, CDCl<sub>3</sub>): δ = 2.39 (s, 3H), 3.75 (s, 2H), 7.06 (s, 1H), 7.20 (d, *J* = 8.0 Hz, 2H), 7.30-7.43 (m, 7H); <sup>13</sup>C NMR (100 MHz, CDCl<sub>3</sub>): δ = 21.1, 36.1, 126.0, 127.2, 128.5, 128.7, 129.3, 131.0, 133.5, 137.3, 137.6, 138.3, 177.9. HRMS (ESI-TOF). Calcd for C<sub>17</sub>H<sub>17</sub>O<sub>2</sub>, [M+H]<sup>+</sup> *m/z* 253.1229, Found 253.1225.

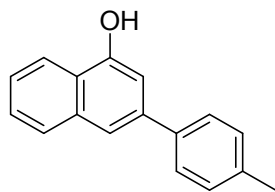

**3-(*p*-tolyl)naphthalen-1-ol 7a**

White solid. mp: 150-151 °C. <sup>1</sup>H NMR (400 MHz, CDCl<sub>3</sub>): δ = 2.44 (s, 3H), 5.54 (s, 1H), 7.07 (s, 1H), 7.29 (d, *J* = 7.6 Hz, 2H), 7.48-7.60 (m, 4H), 7.67 (s, 1H), 7.88 (d, *J* = 7.6 Hz, 1H), 7.21 (d, *J* = 8.0 Hz, 1H); <sup>13</sup>C NMR (100 MHz, CDCl<sub>3</sub>): δ = 21.1, 108.3, 118.4, 121.4, 123.4, 125.2, 126.8, 127.1, 127.9, 129.5, 135.0, 137.2, 137.9, 138.8, 151.6. HRMS (ESI-TOF). Calcd for C<sub>17</sub>H<sub>15</sub>O, [M+H]<sup>+</sup> *m/z* 235.1123, Found 235.1115.

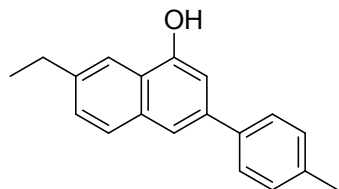

**7-ethyl-3-(*p*-tolyl)naphthalen-1-ol 7b**

White solid. mp: 132-134 °C. <sup>1</sup>H NMR (400 MHz, CDCl<sub>3</sub>): δ = 1.32 (t, *J* = 7.6 Hz, 3H), 2.39 (s, 3H), 2.81 (q, *J* = 7.6 Hz, 2H), 5.42 (s, 1H), 7.00 (s, 1H), 7.23 (d, *J* = 7.6 Hz, 2H), 7.35 (d, *J* = 8.0 Hz, 1H), 7.53 (d, *J* = 8.0 Hz, 2H), 7.58 (s, 1H), 7.75 (d, *J* = 8.4 Hz, 1H), 7.93 (s, 1H); <sup>13</sup>C NMR (100 MHz, CDCl<sub>3</sub>): δ = 15.6, 21.1, 29.2, 108.4, 118.2, 119.0, 123.5, 127.0, 128.0, 128.0, 129.5, 133.5, 137.0, 137.8, 138.1, 141.3, 151.3. HRMS (ESI-TOF). Calcd for C<sub>19</sub>H<sub>19</sub>O, [M+H]<sup>+</sup> *m/z* 263.1436, Found 263.1428.

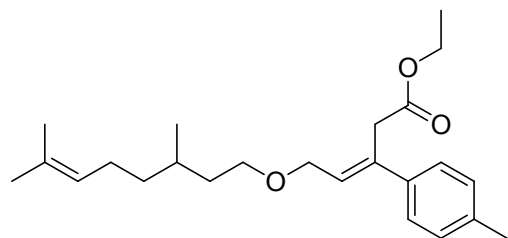

**(*E*)-ethyl 5-((3,7-dimethyloct-6-en-1-yl)oxy)-3-(*p*-tolyl)pent-3-enoate 9**

Colorless oil. <sup>1</sup>H NMR (400 MHz, CDCl<sub>3</sub>): δ = 0.91 (d, *J* = 6.4 Hz, 3H), 1.19 (t, *J* = 7.2 Hz, 3H), 1.35-1.44 (m, 3H), 1.56-1.68 (m, 8H), 1.95-2.03 (m, 2H), 2.33 (s, 3H), 3.49-3.53 (m, 4H), 4.10 (q, *J* = 7.2 Hz, 2H), 4.20 (d, *J* = 6.4 Hz, 2H), 5.10 (t, *J* = 6.4 Hz, 1H), 6.09 (t, *J* = 6.4 Hz, 1H), 7.13 (d,



$J = 8.0$  Hz, 2H), 7.31 (d,  $J = 8.0$  Hz, 2H);  $^{13}\text{C}$  NMR (100 MHz,  $\text{CDCl}_3$ ):  $\delta = 14.1, 17.6, 19.5, 21.0, 25.5, 25.7, 29.6, 36.4, 36.7, 37.2, 60.8, 67.8, 69.0, 124.8, 125.9, 128.0, 129.0, 131.1, 134.9, 137.1, 138.6, 171.0$ . HRMS (ESI-TOF). Calcd for  $\text{C}_{24}\text{H}_{37}\text{O}_3$ ,  $[\text{M}+\text{H}]^+$   $m/z$  373.2743, Found 373.2739.

## 5. Structure Analysis X-Ray Crystallography of 6

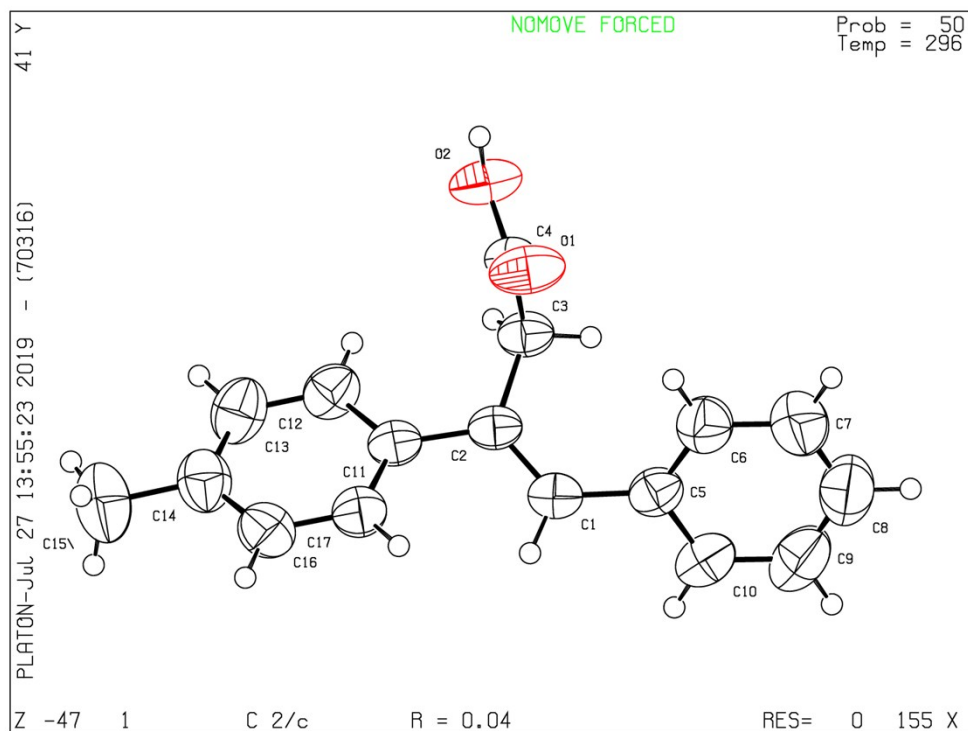

| Compound                          | <b>6</b>                                       |
|-----------------------------------|------------------------------------------------|
| Empirical formula                 | C <sub>17</sub> H <sub>16</sub> O <sub>2</sub> |
| Formula weight                    | 252.30                                         |
| Crystal system                    | Monoclinic                                     |
| Space group                       | C2/c                                           |
| <i>a</i> (Å)                      | 18.085(4)                                      |
| <i>b</i> (Å)                      | 9.7655(19)                                     |
| <i>c</i> (Å)                      | 17.955(4)                                      |
| $\alpha$ (°)                      | 90                                             |
| $\beta$ (°)                       | 115.852(15)                                    |
| $\gamma$ (°)                      | 90                                             |
| <i>V</i> (Å <sup>3</sup> )        | 2853.7(11)                                     |
| <i>Z</i>                          | 8                                              |
| <i>D</i> /g cm <sup>-3</sup>      | 1.174                                          |
| $\mu$ /mm <sup>-1</sup>           | 0.076                                          |
| <i>F</i> (000)                    | 1072.0                                         |
| Reflns number                     | 14941                                          |
| <i>R</i> <sub>int</sub>           | 0.0364                                         |
| <i>R</i> <sub><i>I</i></sub>      | 0.0440                                         |
| GOF                               | 1.012                                          |
| <i>wR</i> <sup>2</sup> (all data) | 0.1346                                         |

## 6. References

- [1] A. K. Gupta, X. Yin, M. Mukherjee, A. A. Desai, A. Mohammadlou, K. Jurewicz and W. D. Wulff, *Angew. Chem. Int. Ed.*, 2019, **58**, 3361.
- [2] X. Hong, L. Lu and Q. Shen, *Synlett*, 2019, **30**, 1602.
- [3] A. Suárez and G. C. Fu, *Angew. Chem. Int. Ed.*, 2004, **43**, 3580.
- [4] D. Mal and S. Jana, *J. Org. Chem.*, 2016, **81**, 11857.
- [5] J. L. Liang, U. Javed, S. H. Lee, J. G. Park and Y. Jahng, *Arch. Pharm. Res.*, 2014, **37**, 862.

## 7. <sup>1</sup>H and <sup>13</sup>C NMR Spectra of Compounds 4-7 and 9

### Product 4a

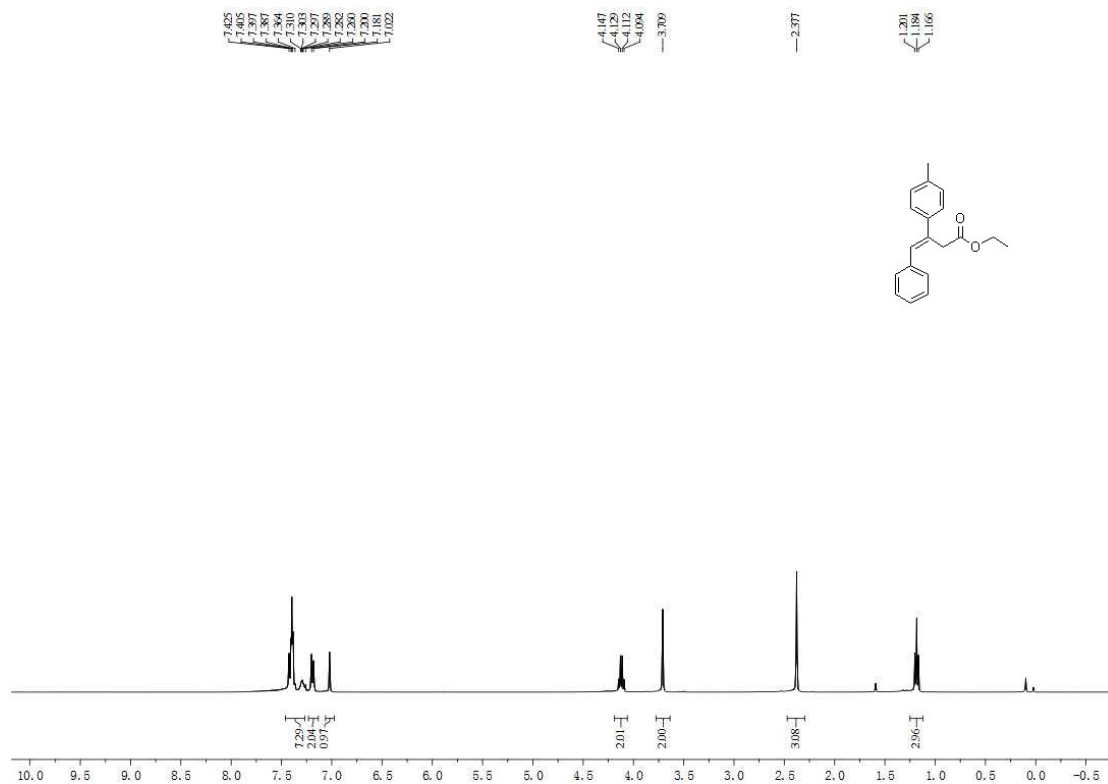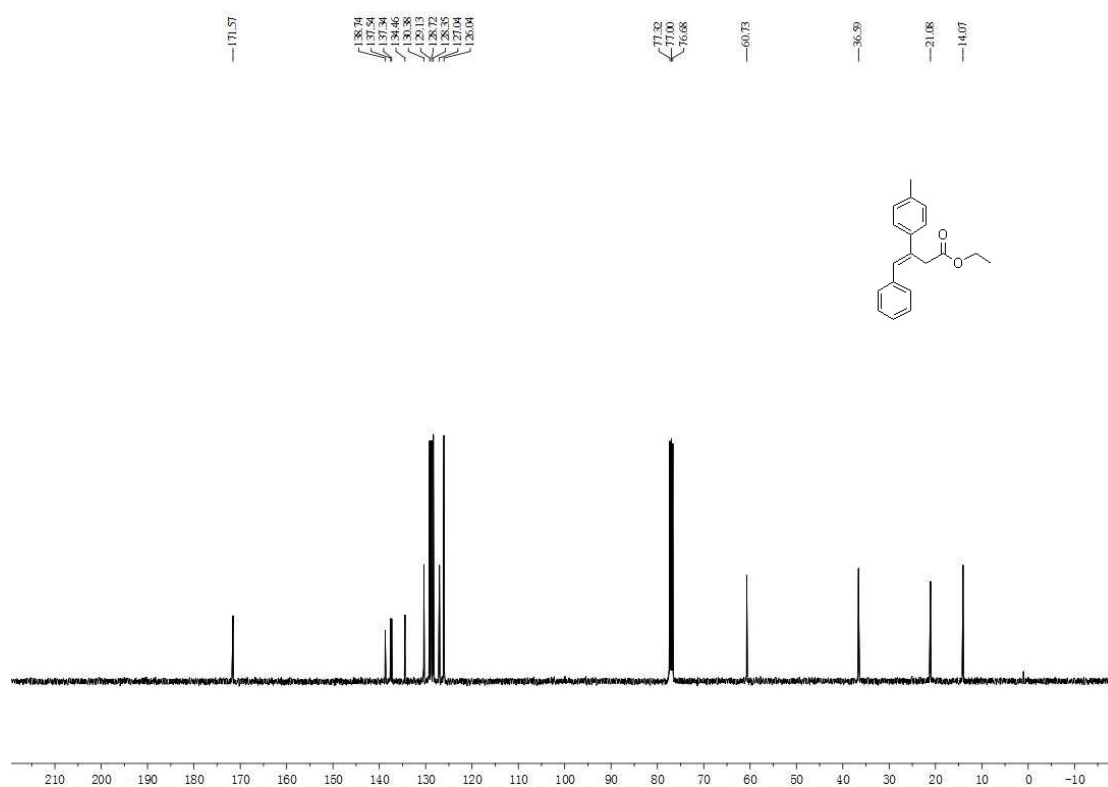

**Product 4b**

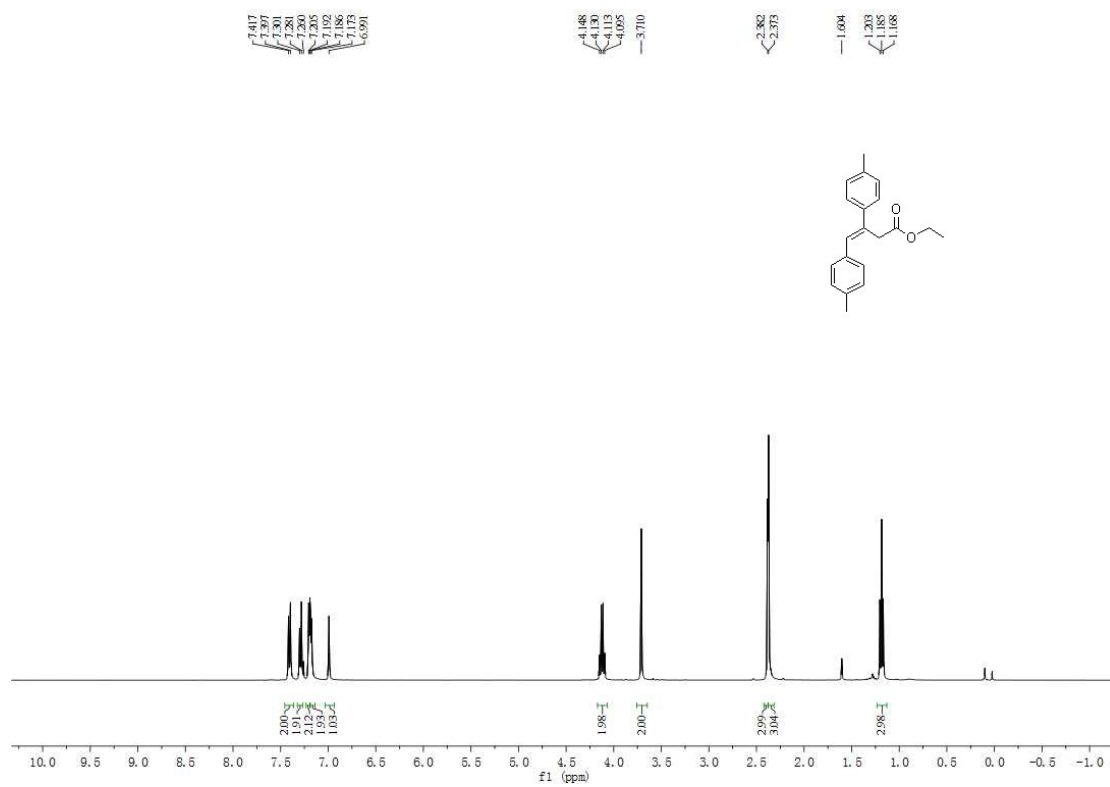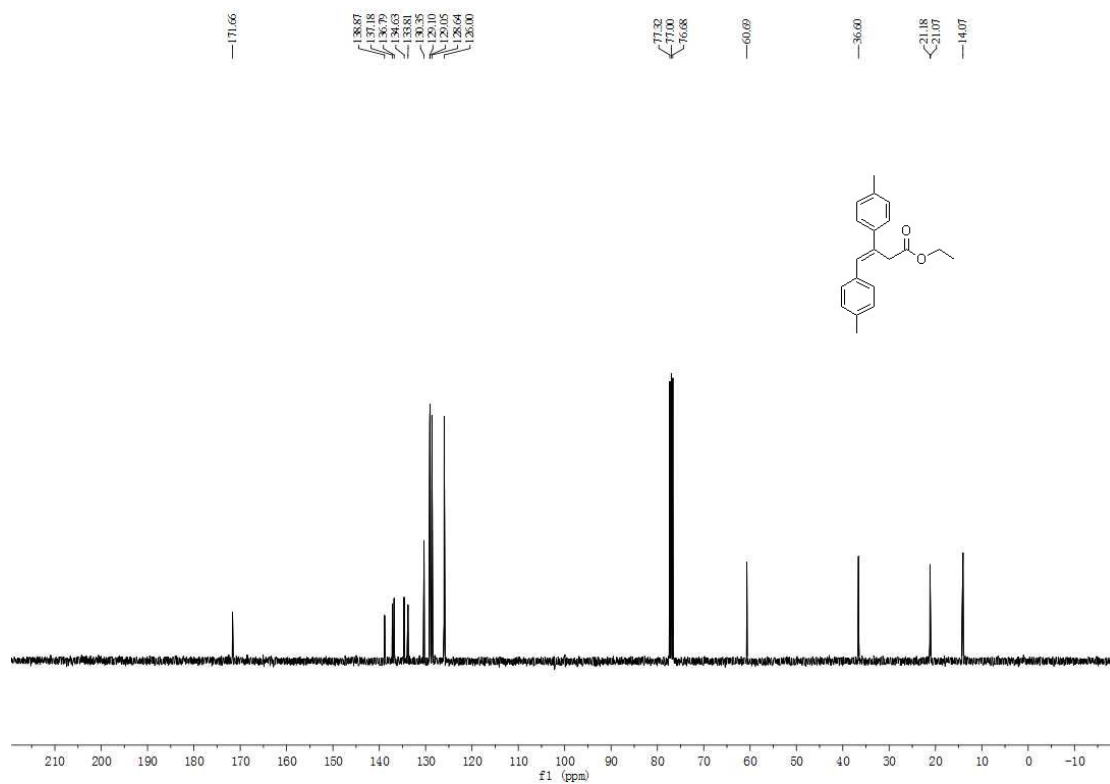

Product 4c

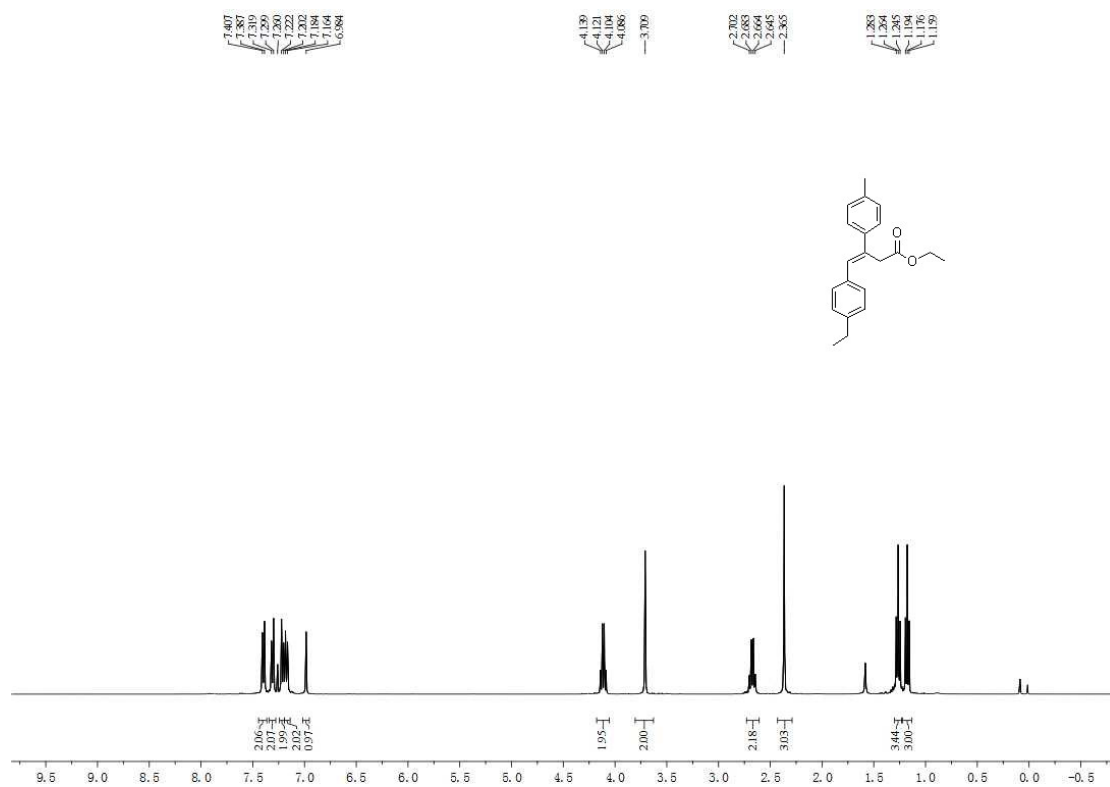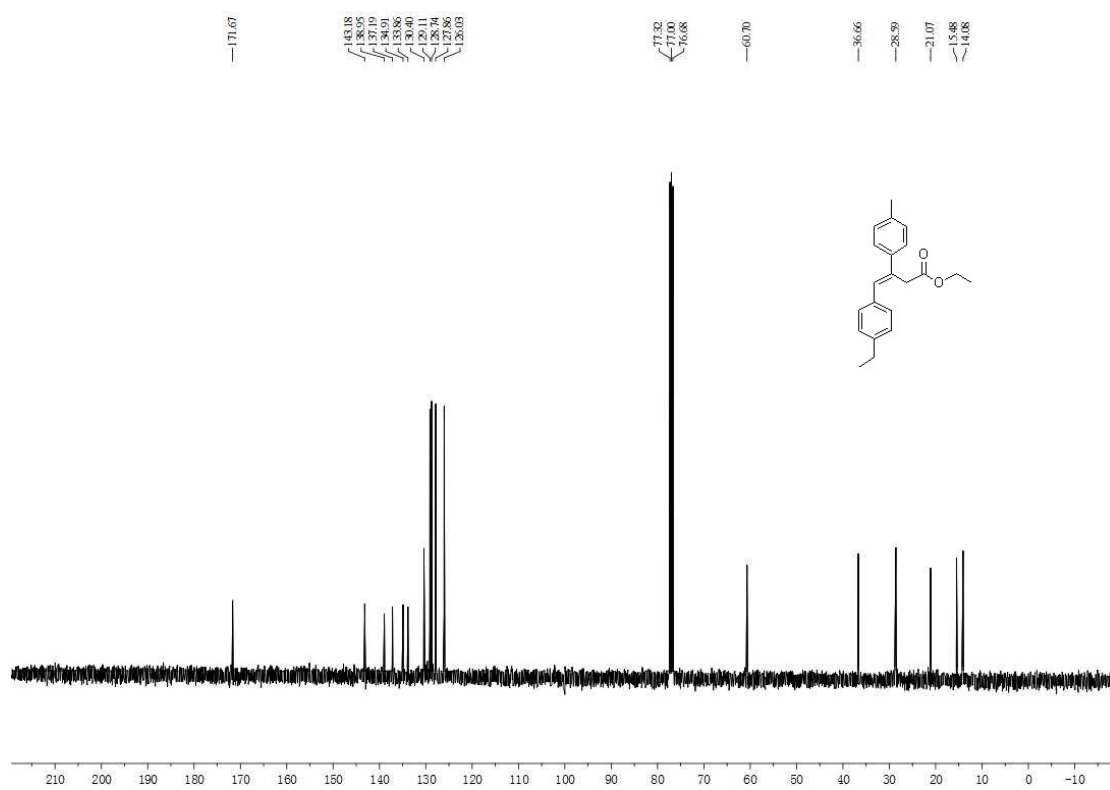

**Product 4d**

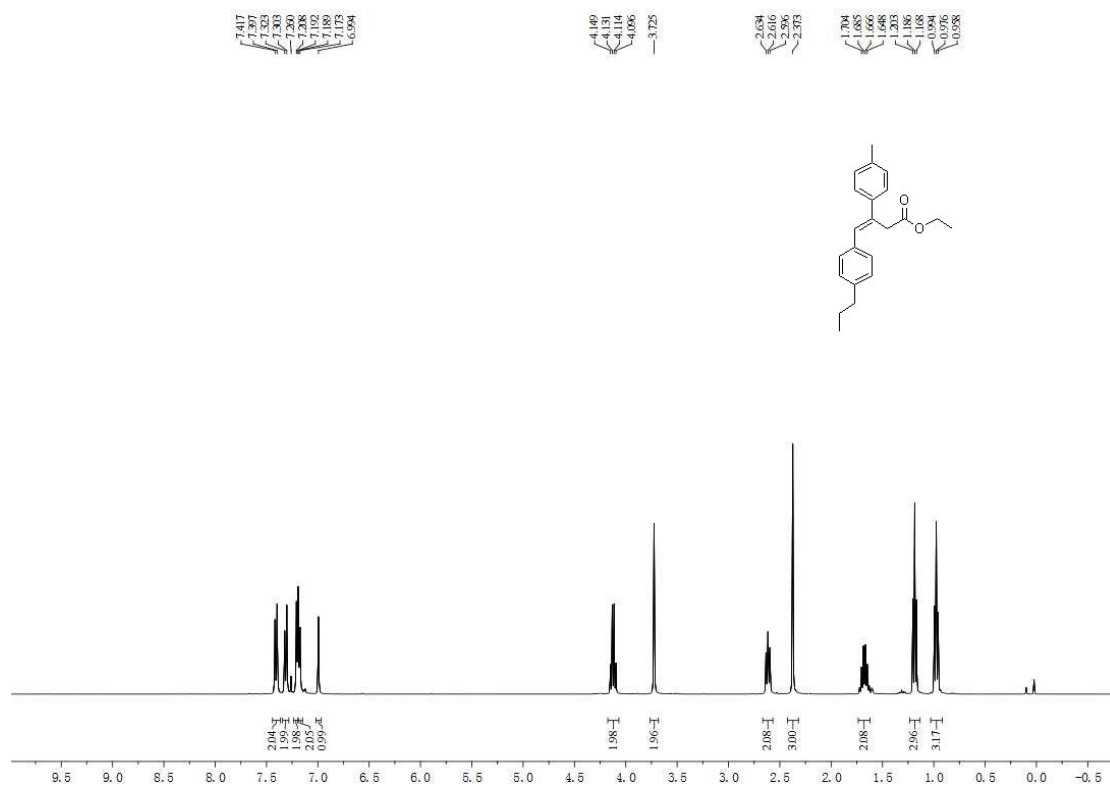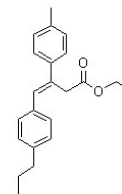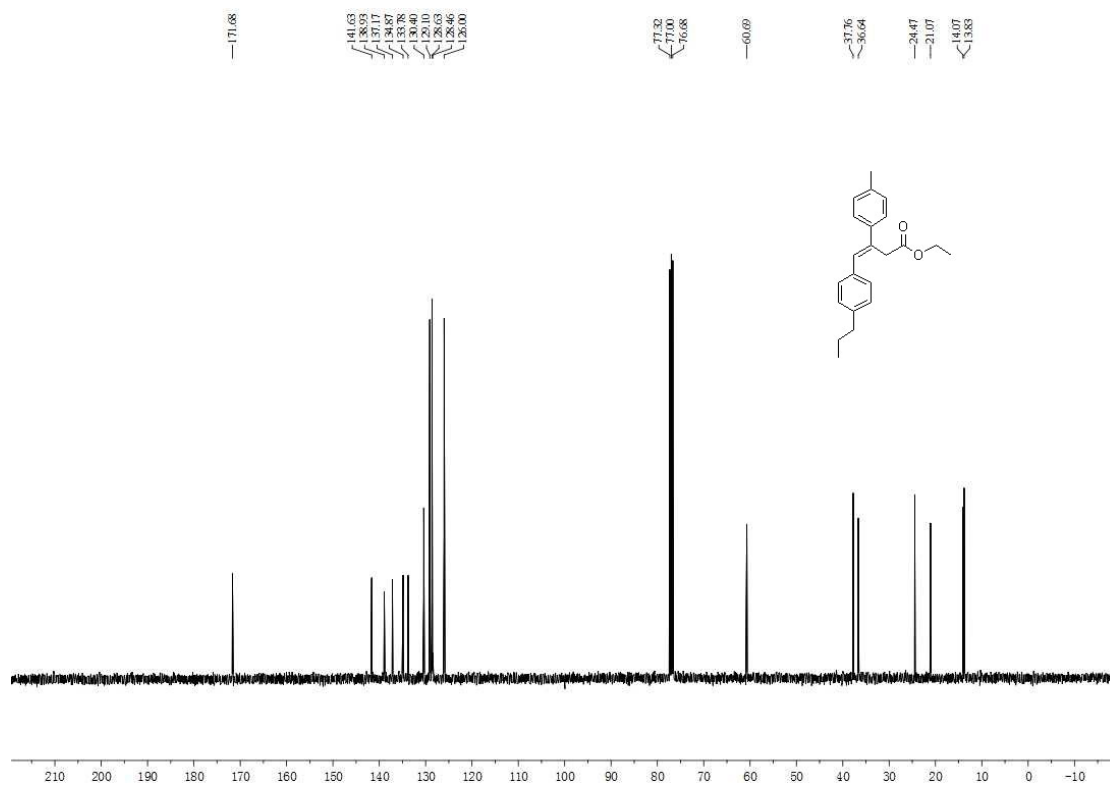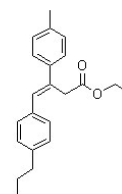

**Product 4e**

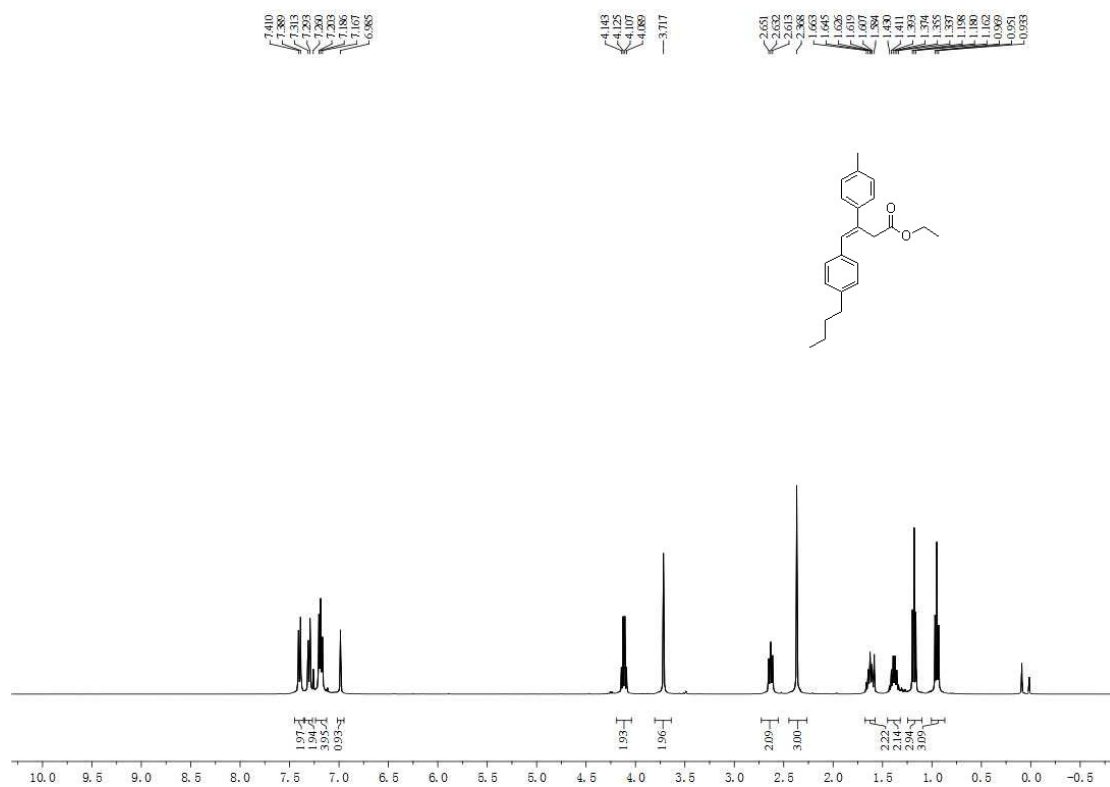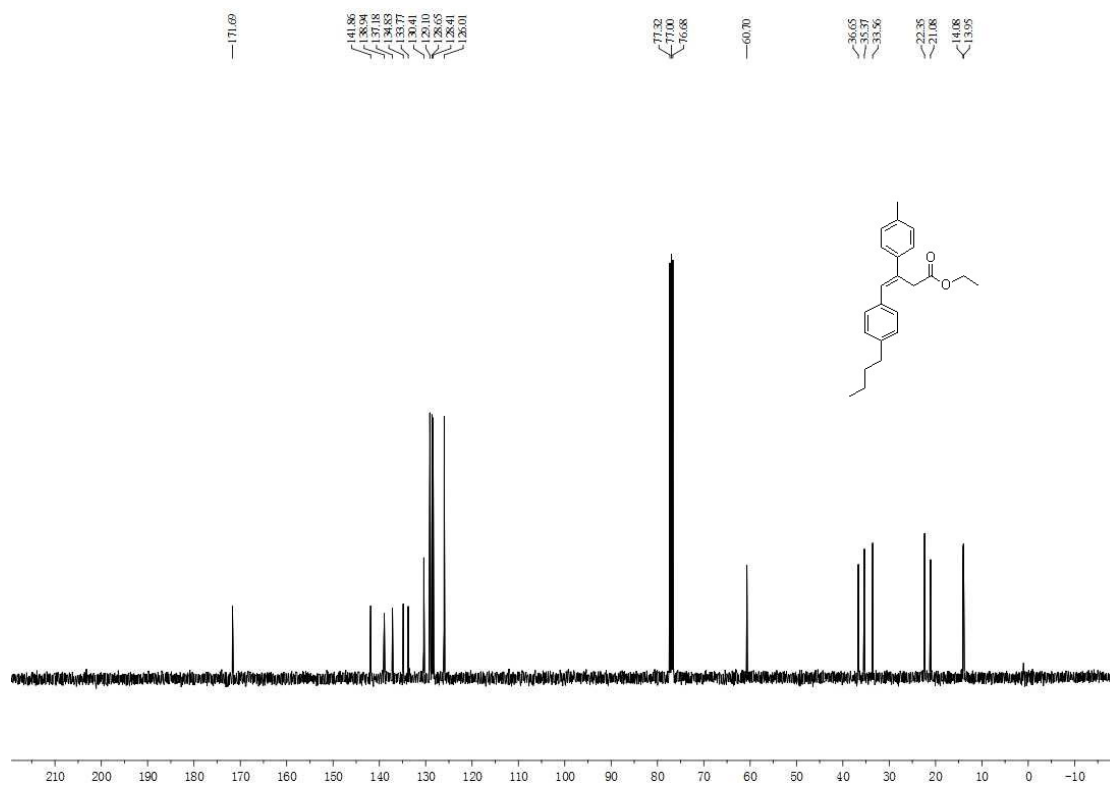



# Product 4f

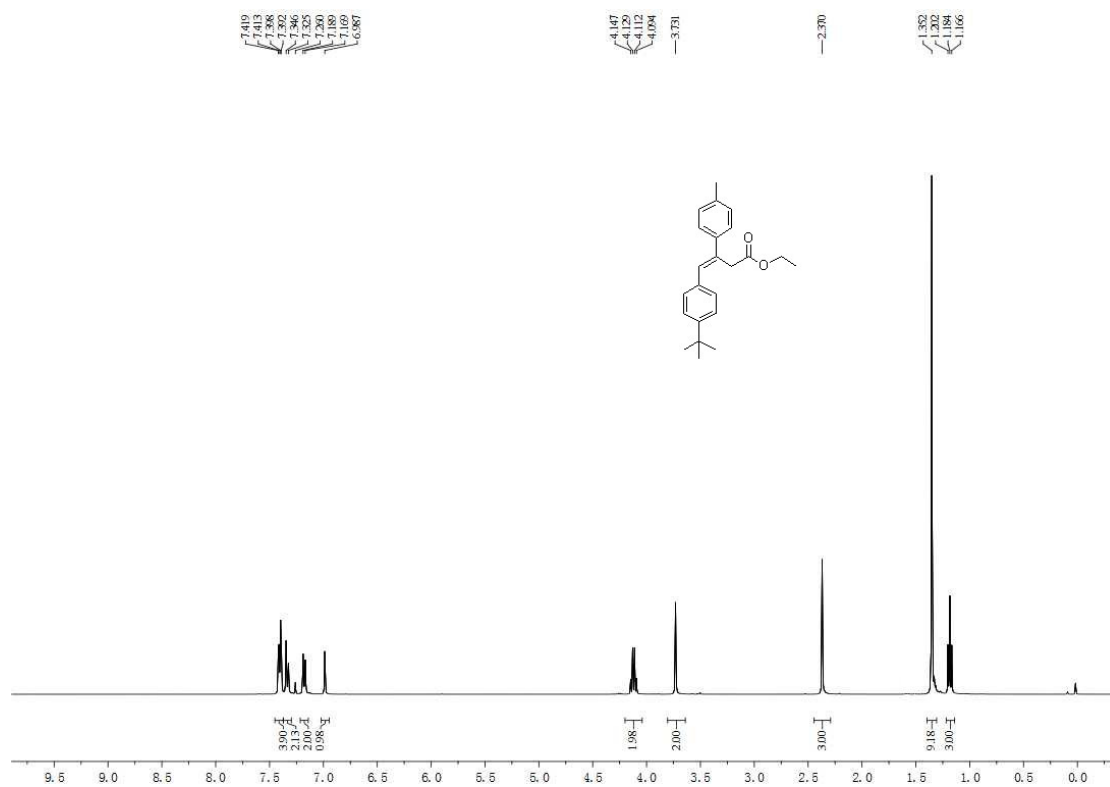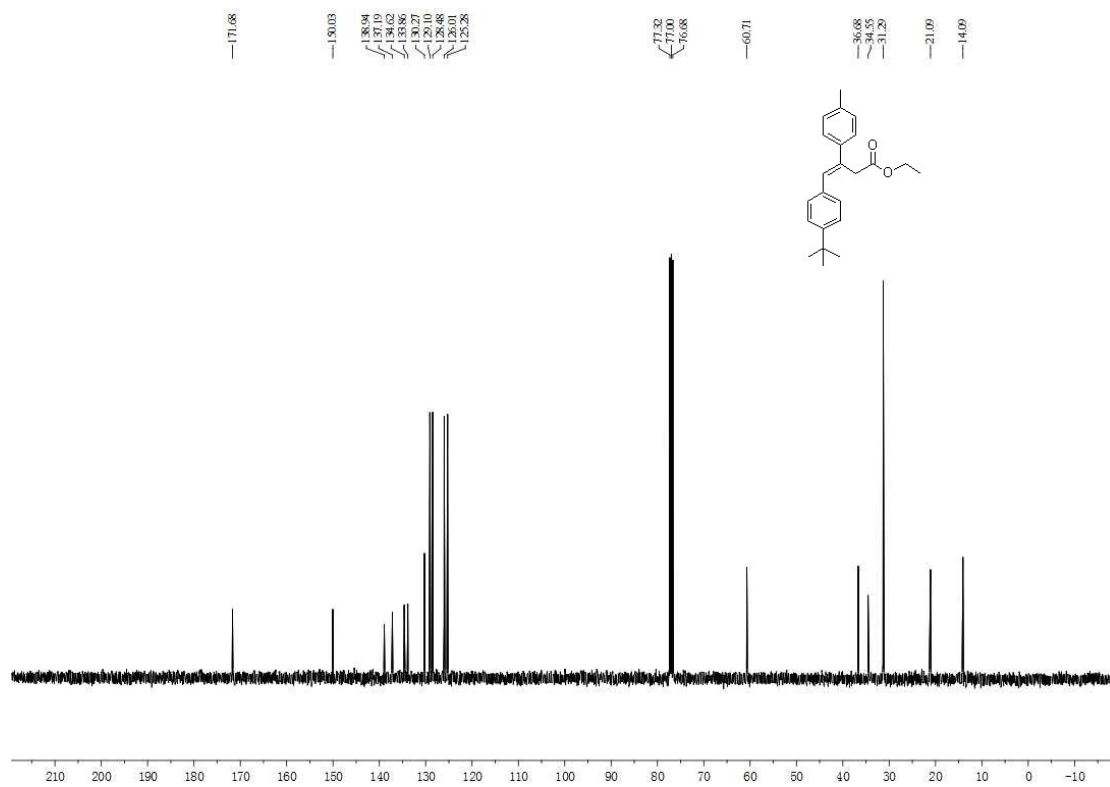

# Product 4g

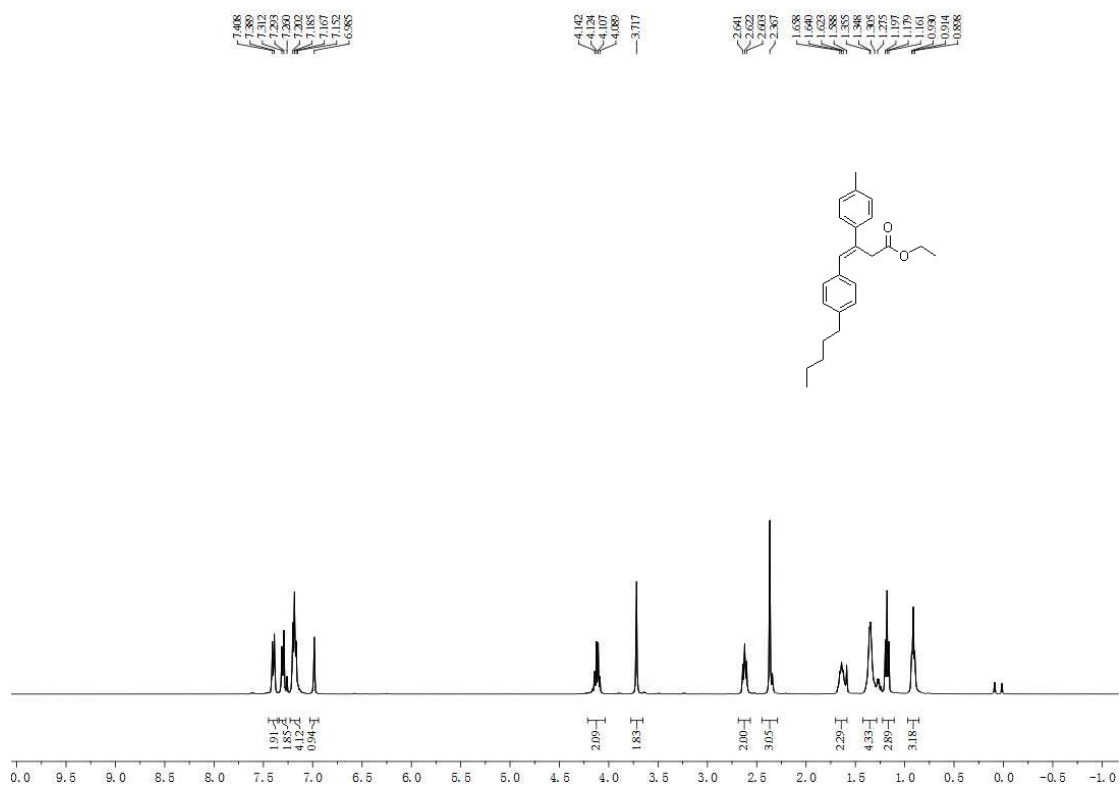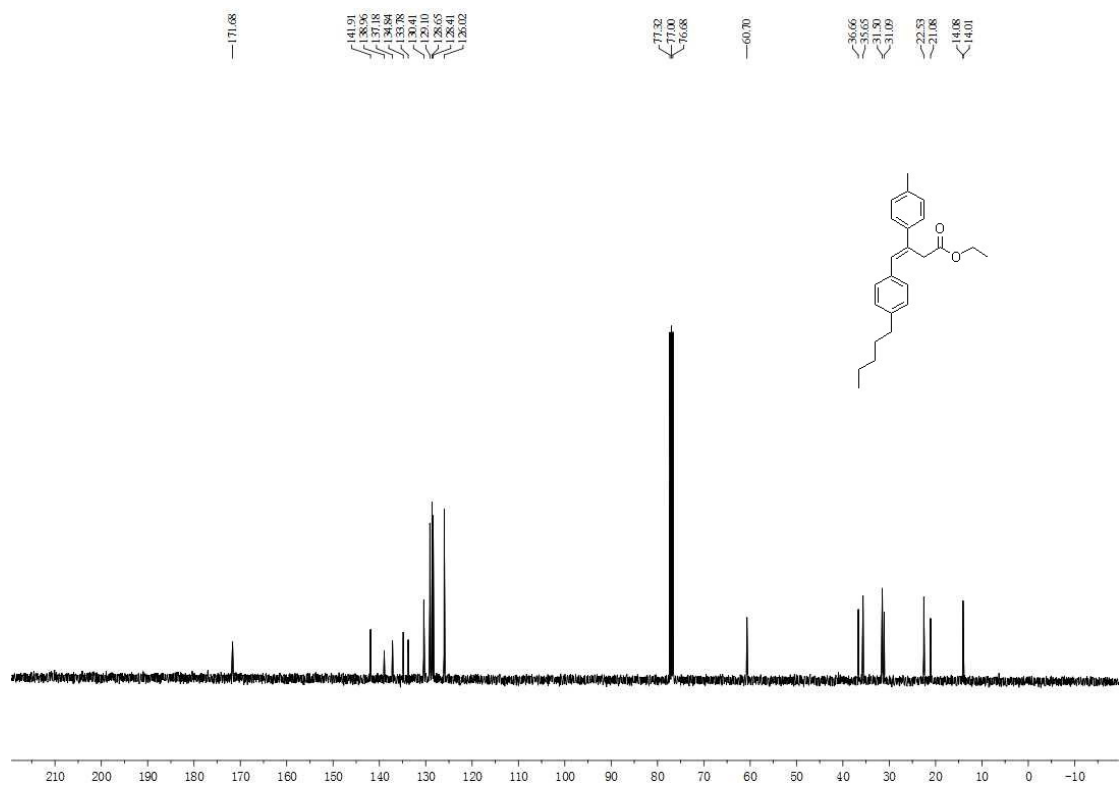

**Product 4h**

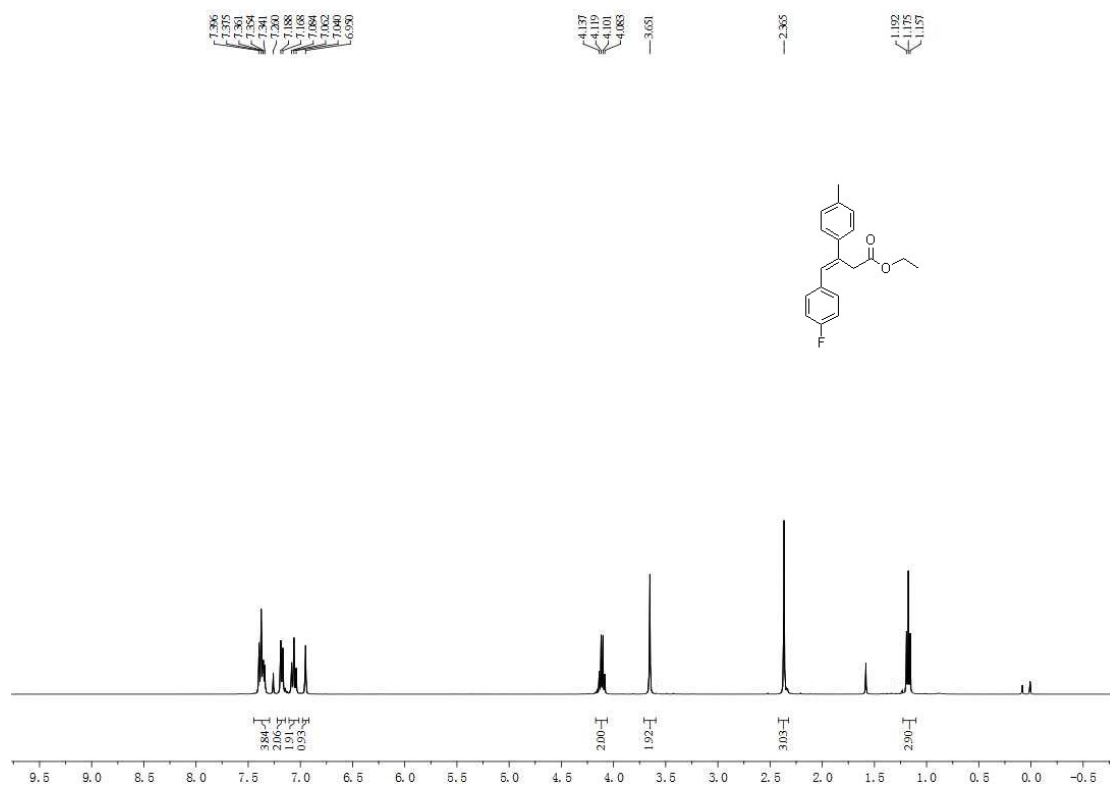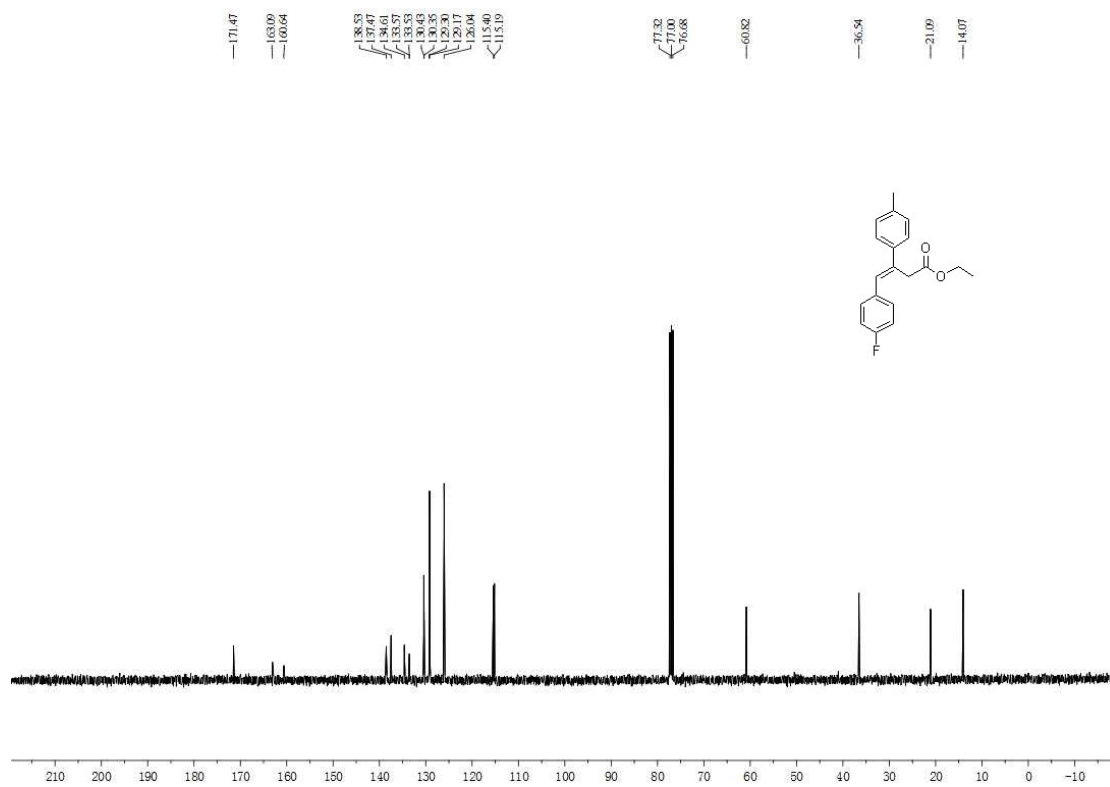

# Product 4i

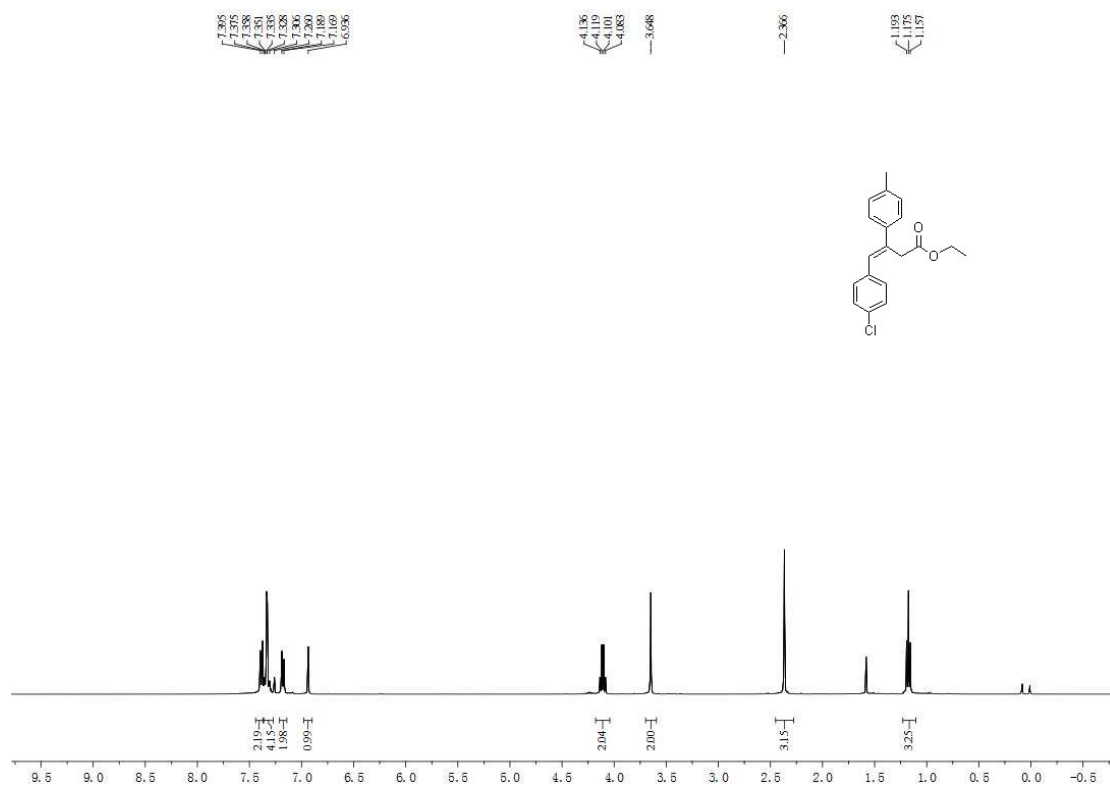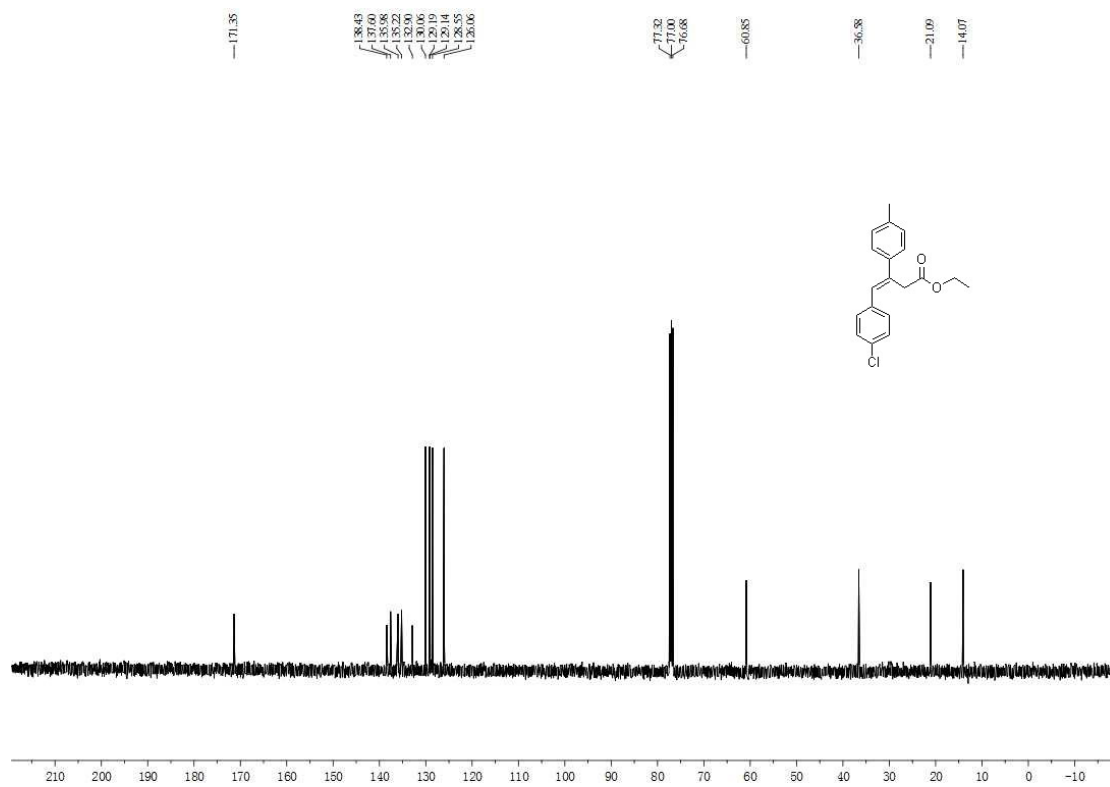

**Product 4j**

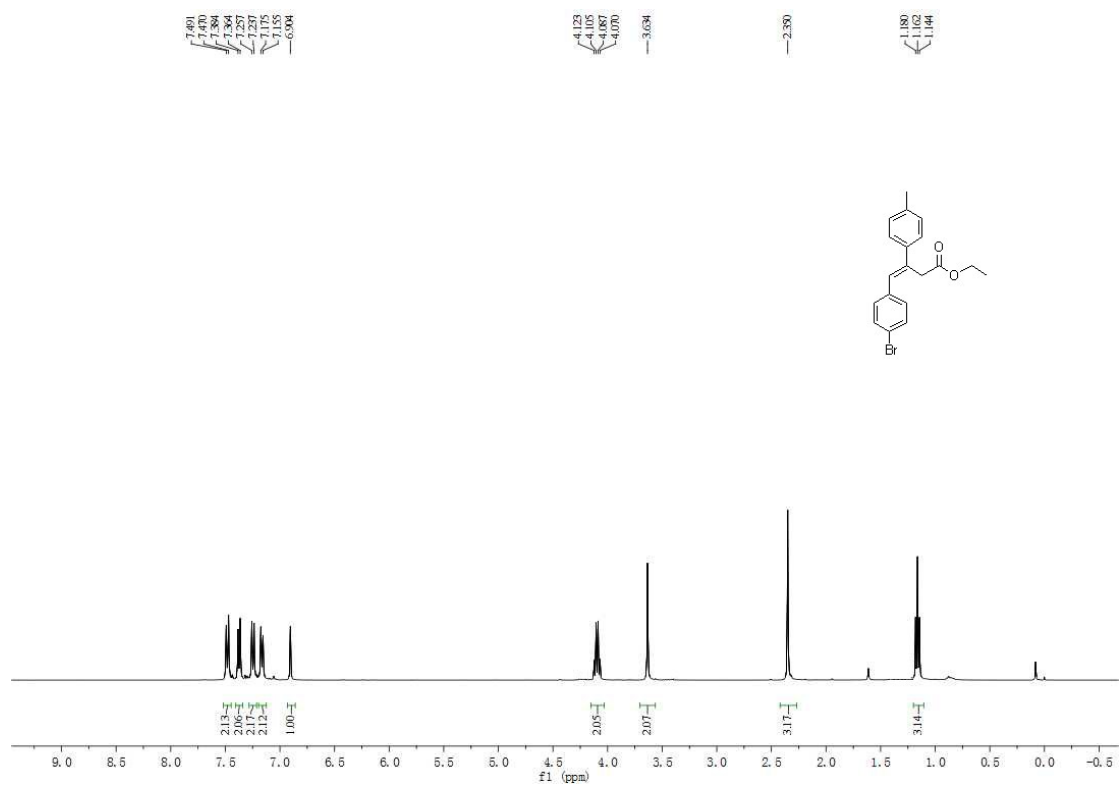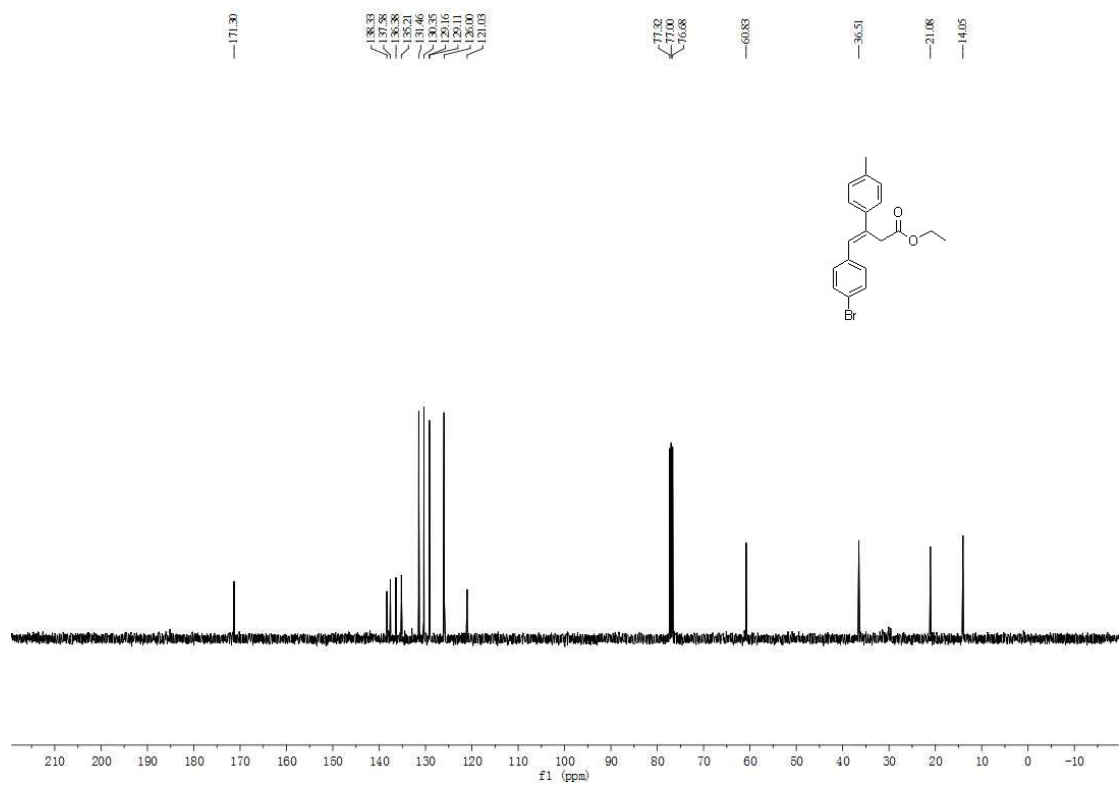

**Product 4k**

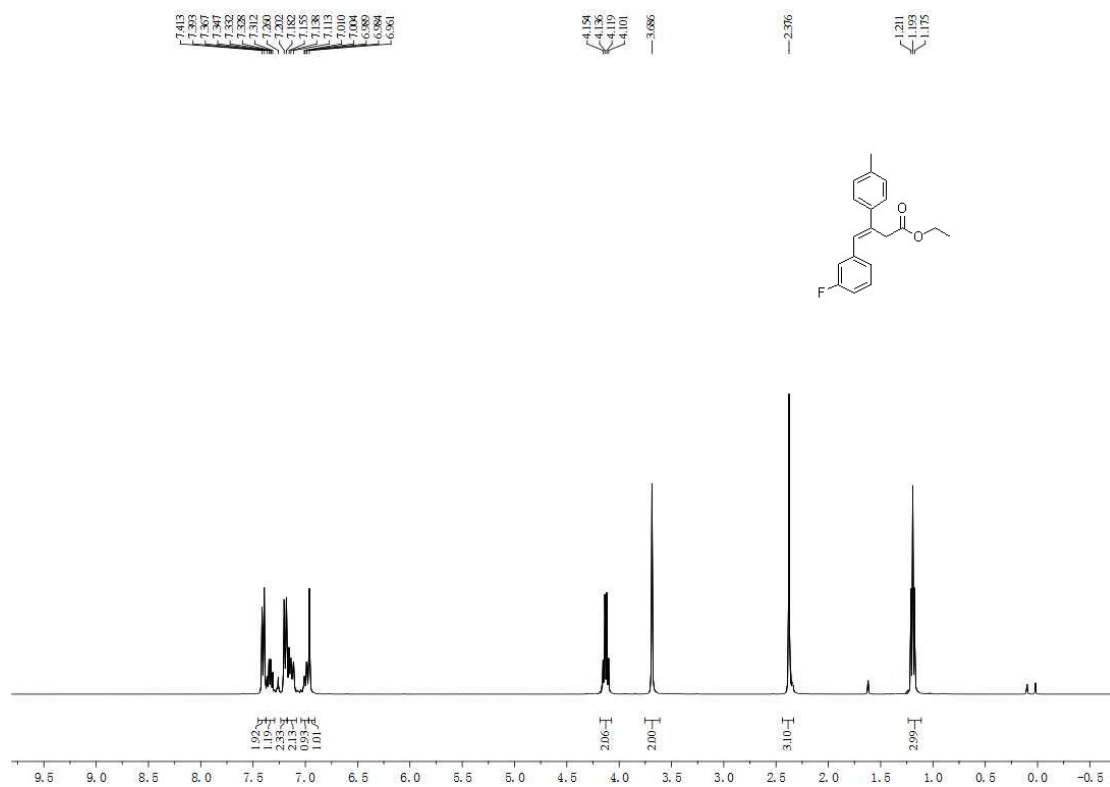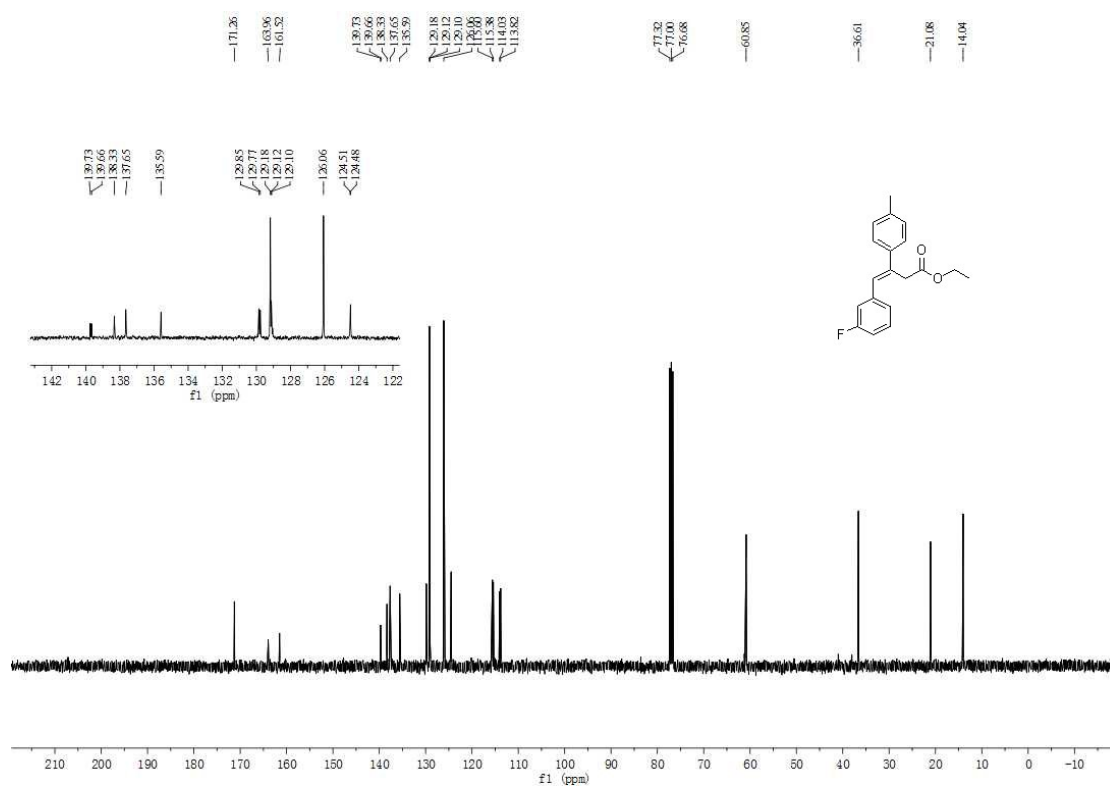

**Product 4l**

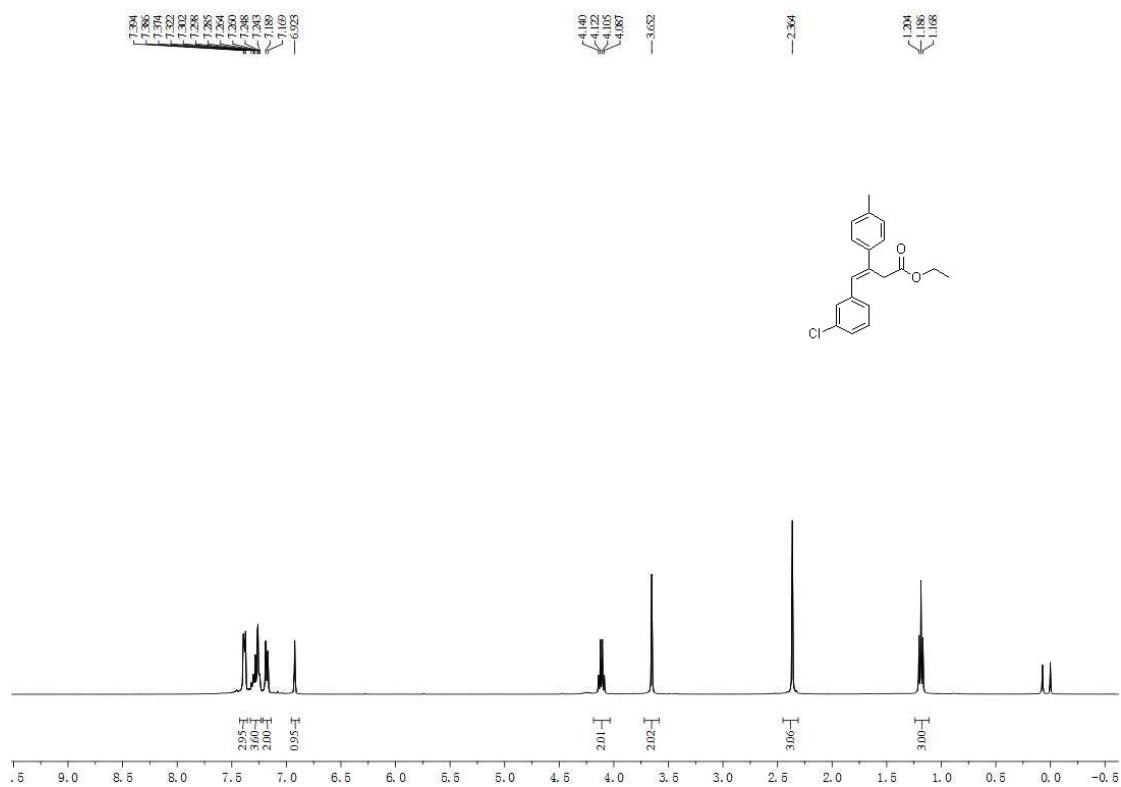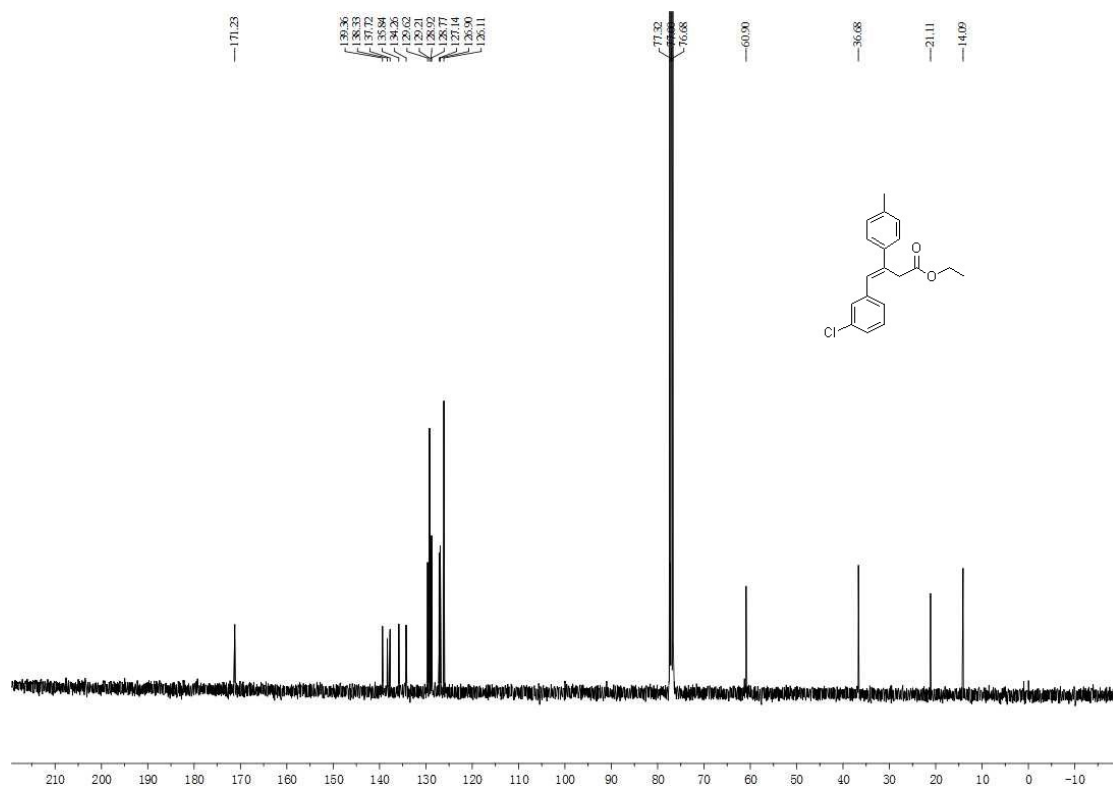

**Product 4m**

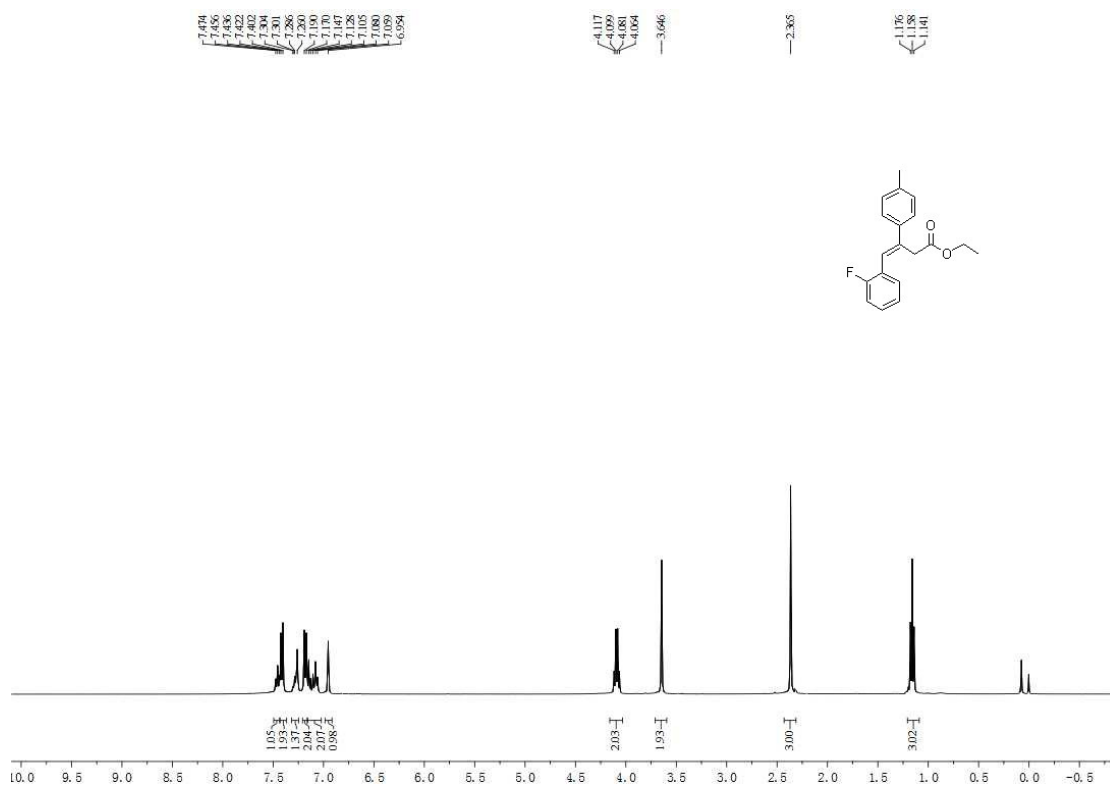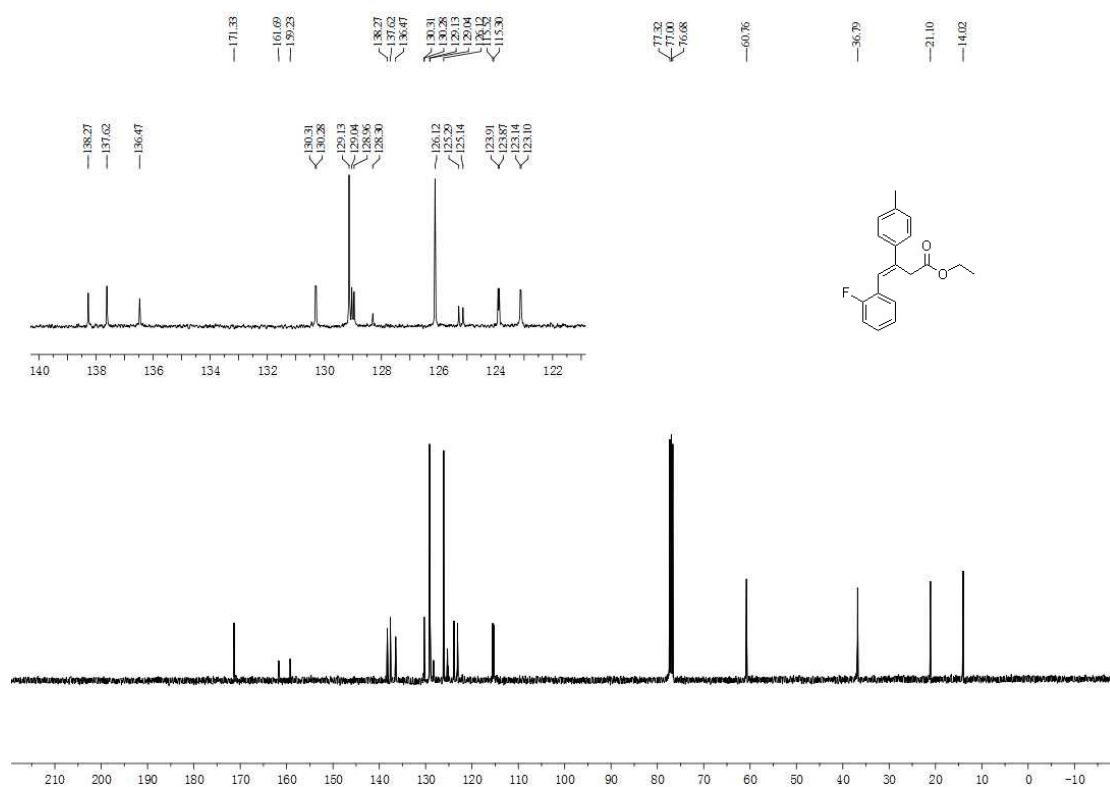



**Product 4n**

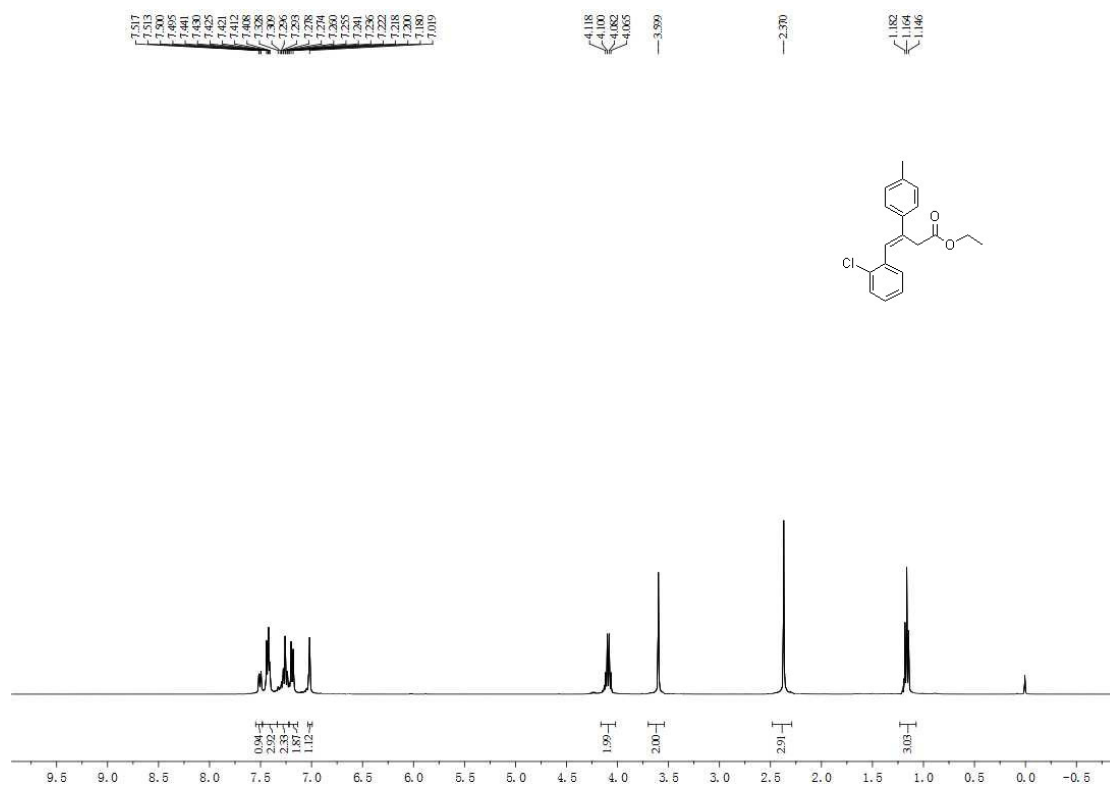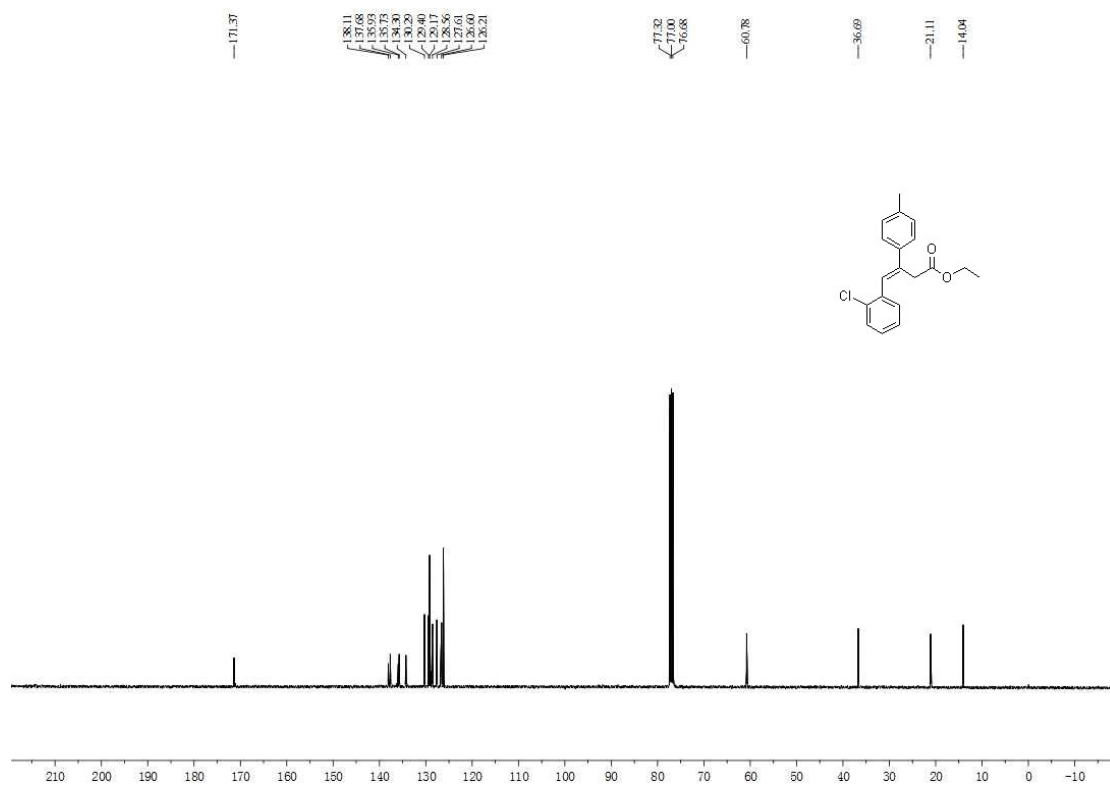

**Product 4o**

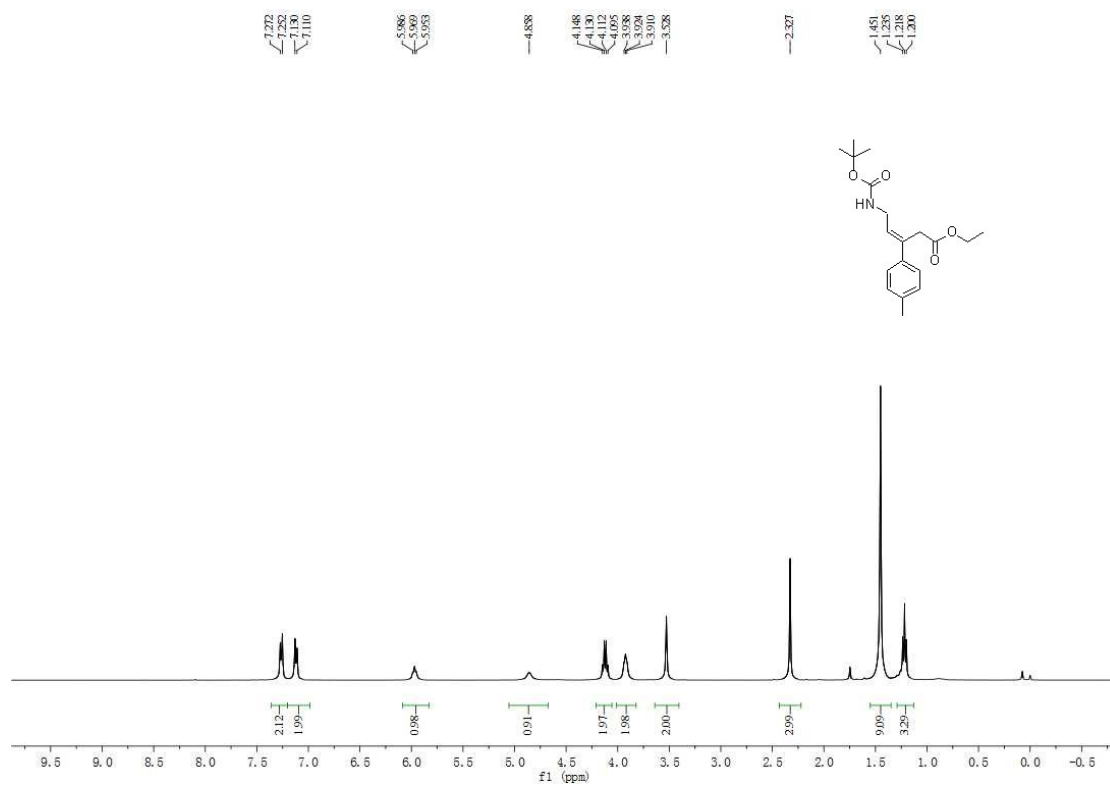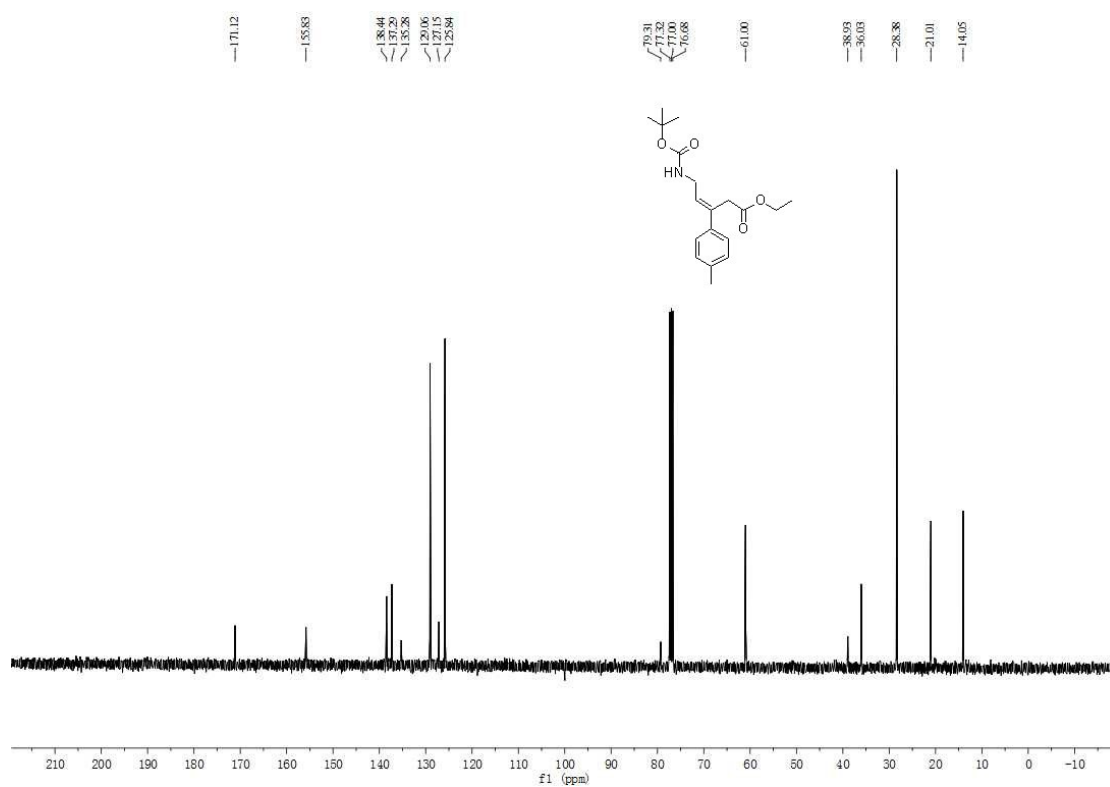

# Product 4p

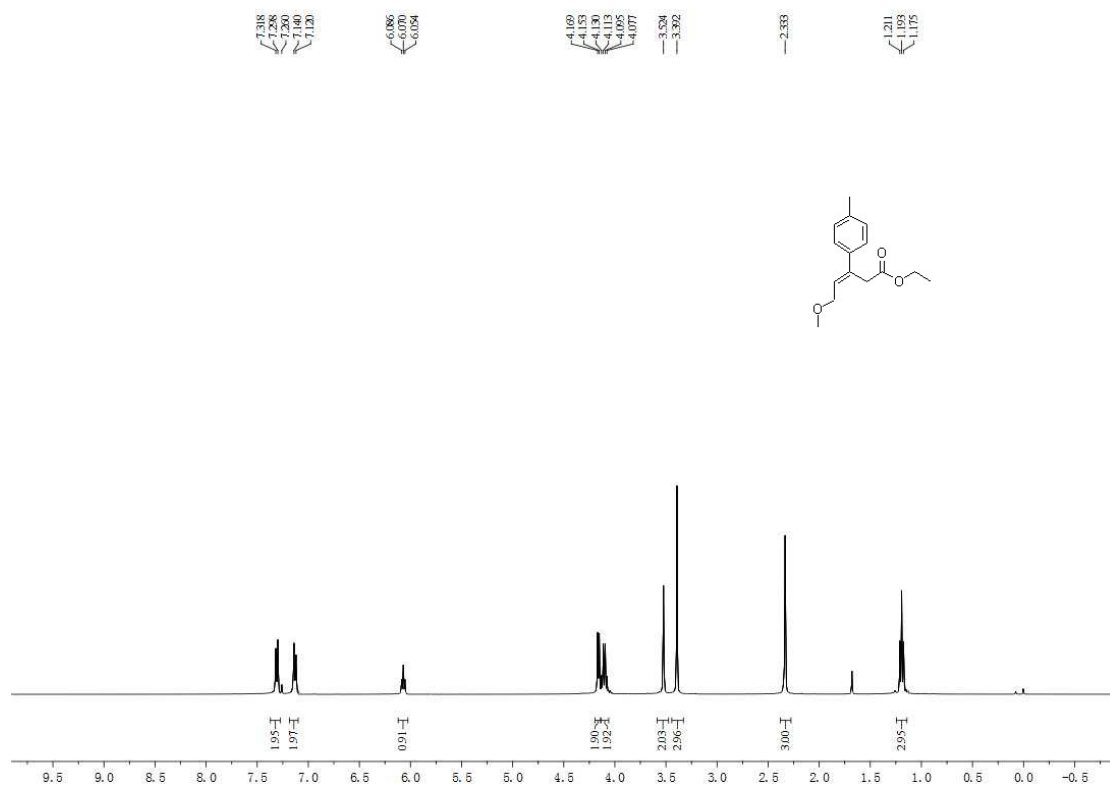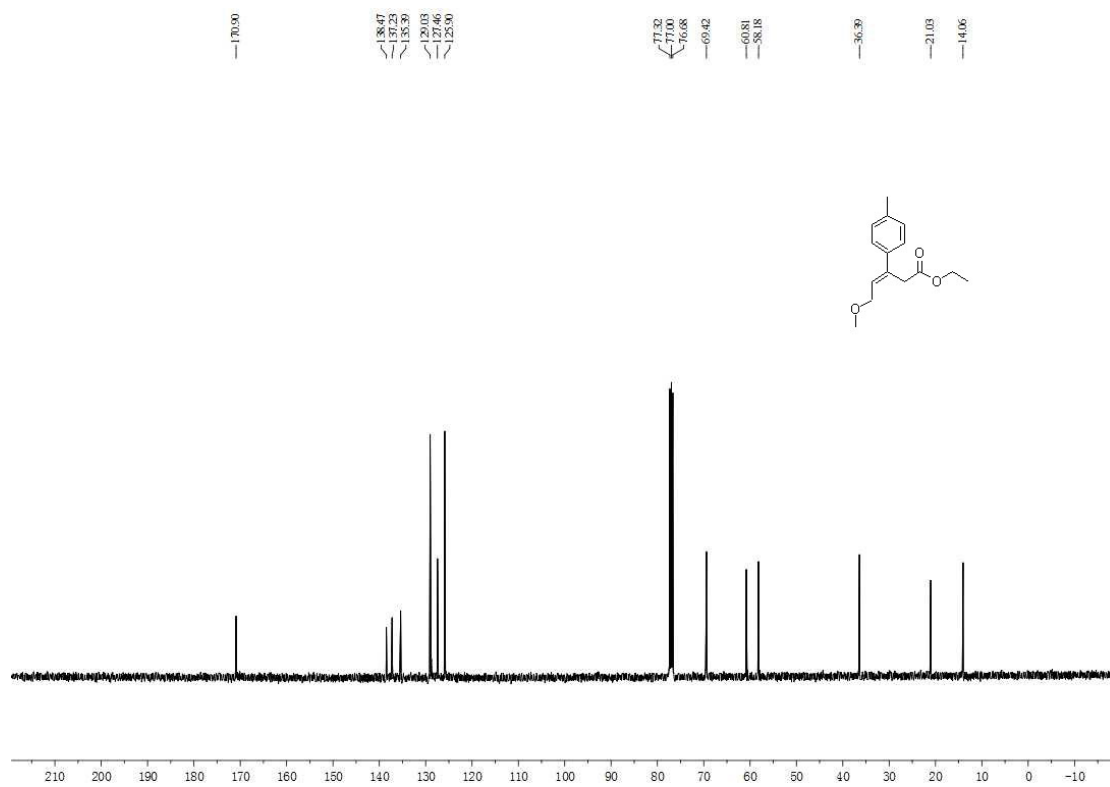

**Product 4q**

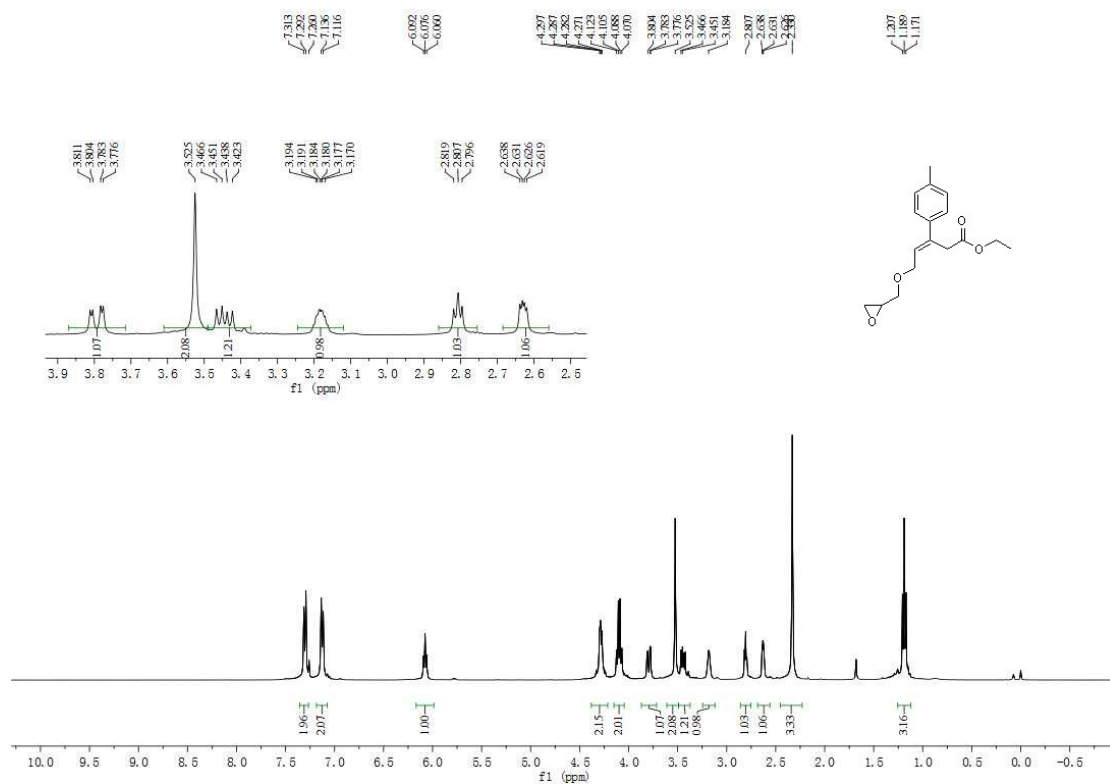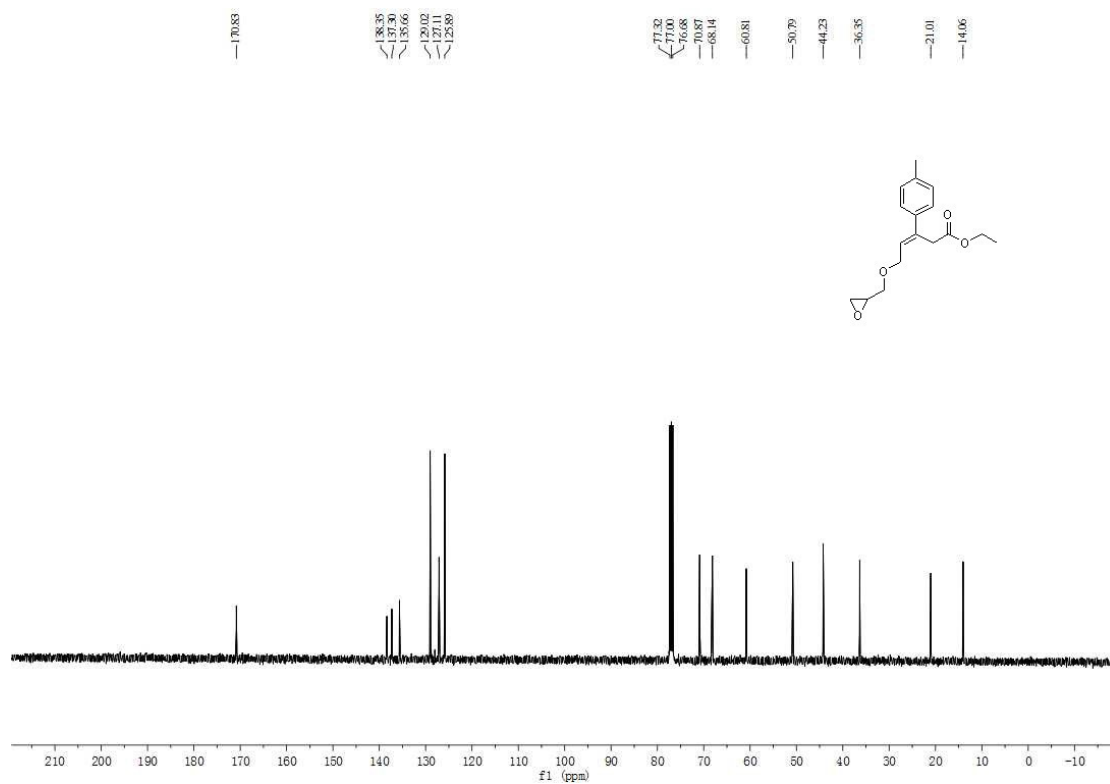

**Product 4r**

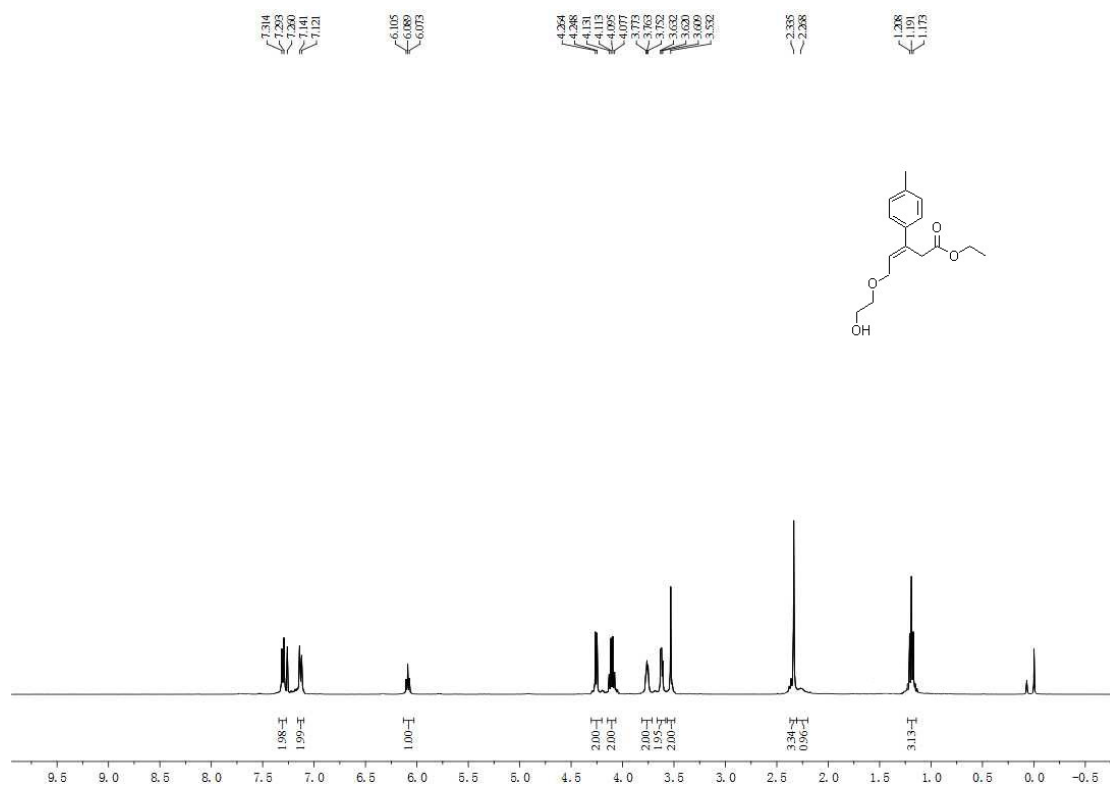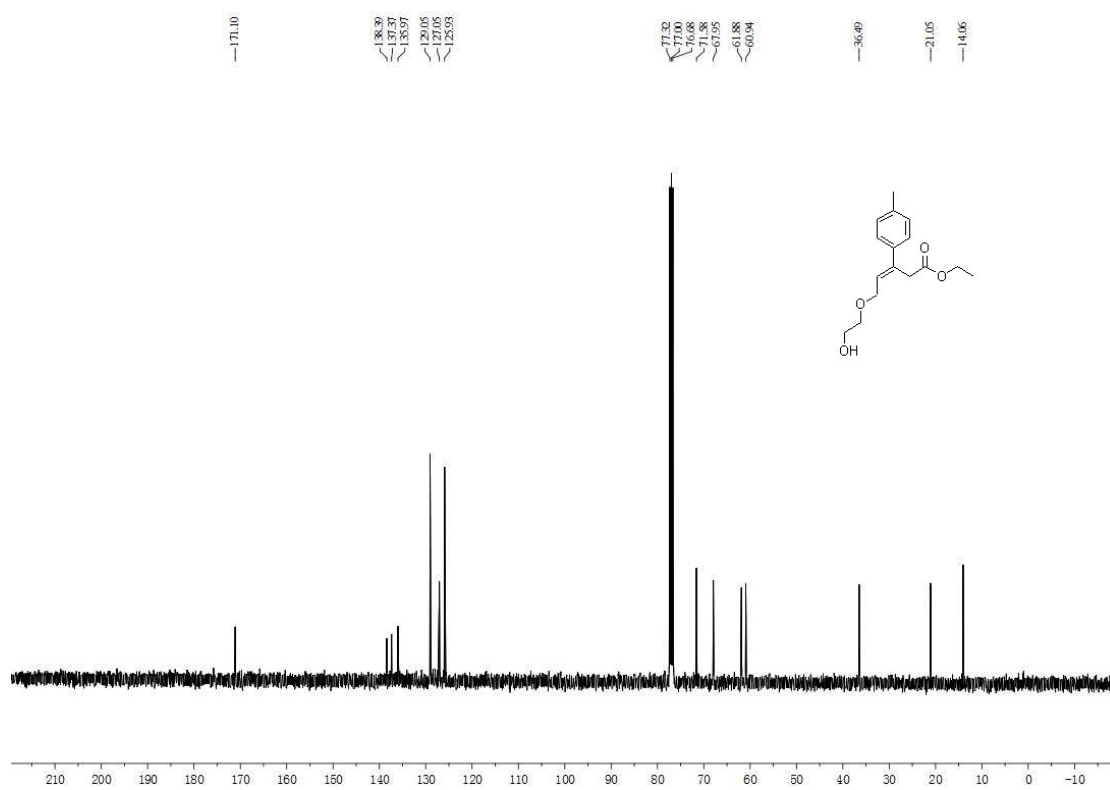

**Product 4s**

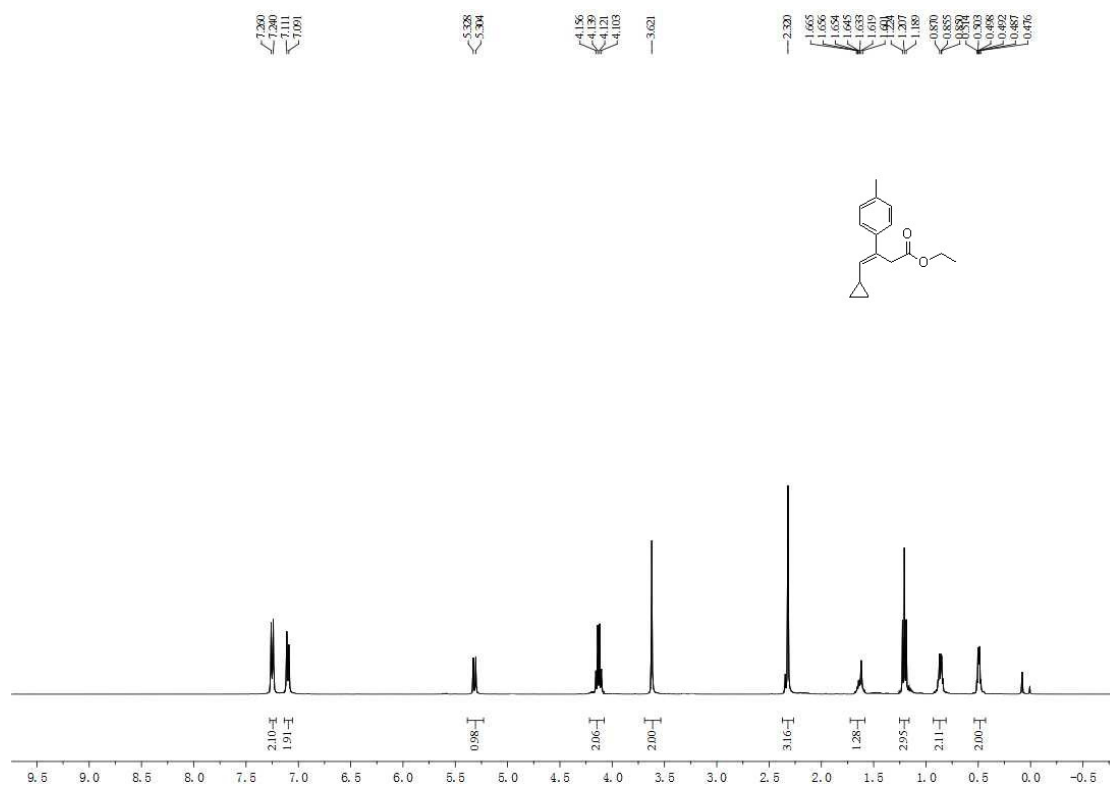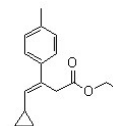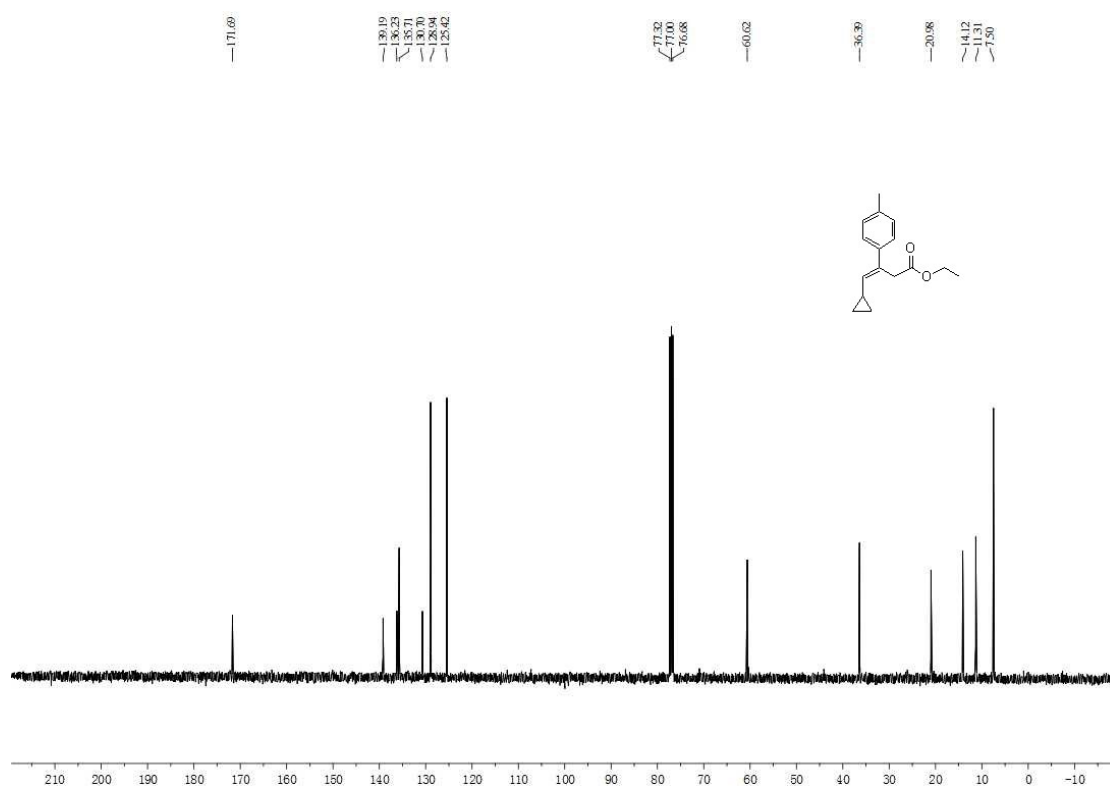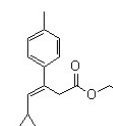

**Product 4t**

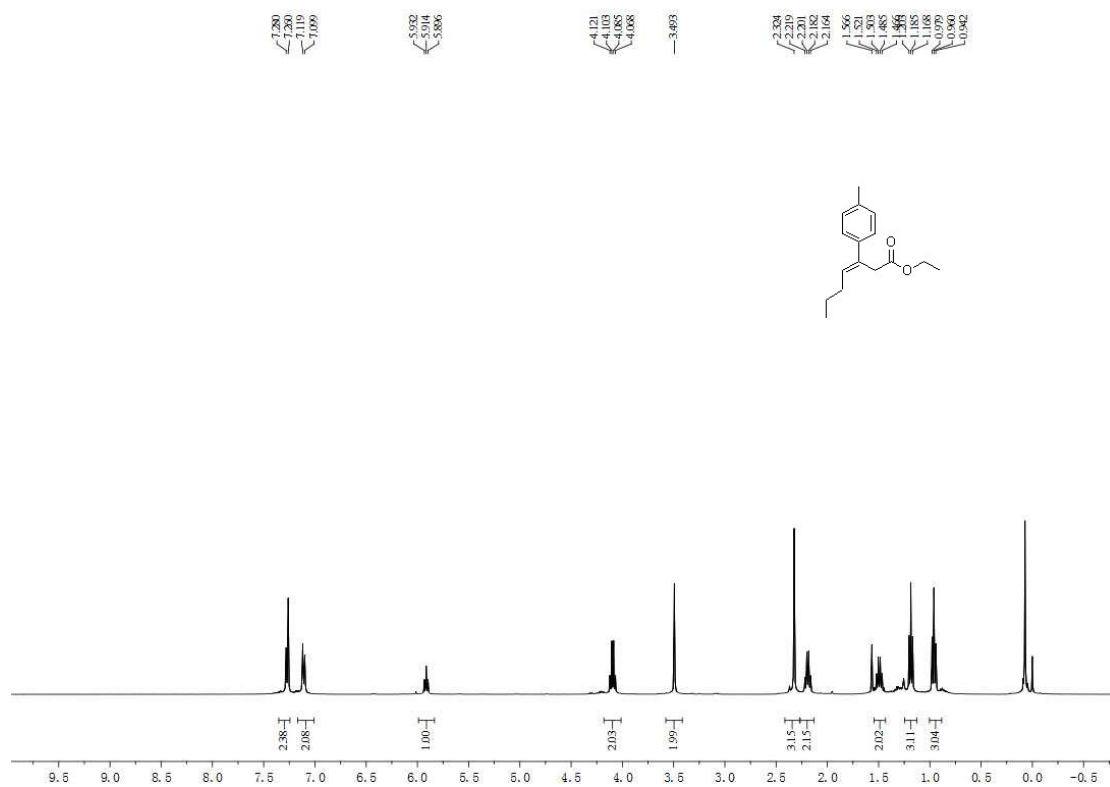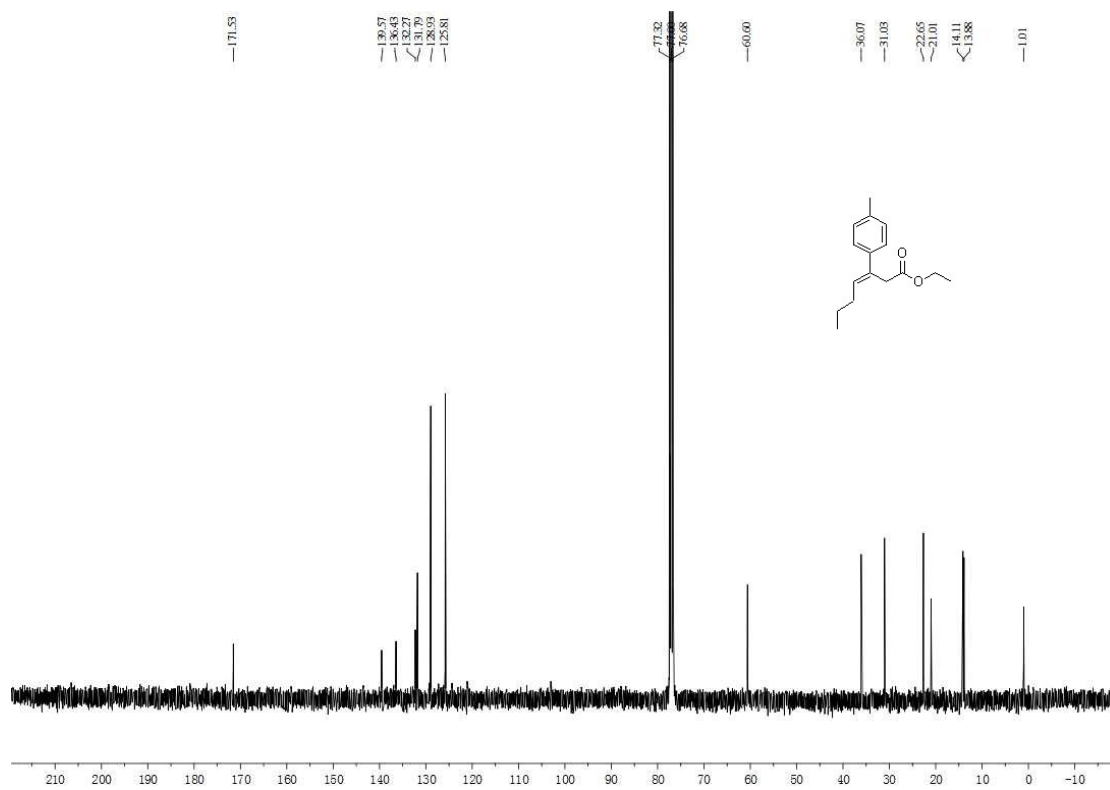

Product 4u

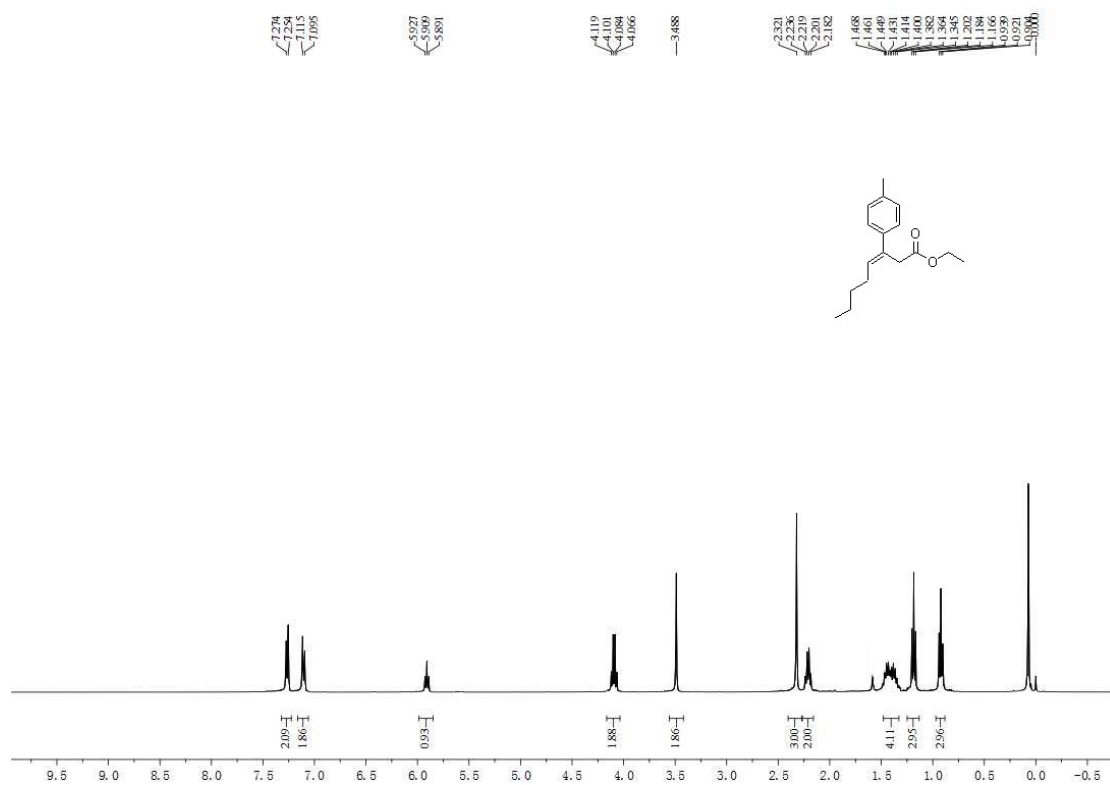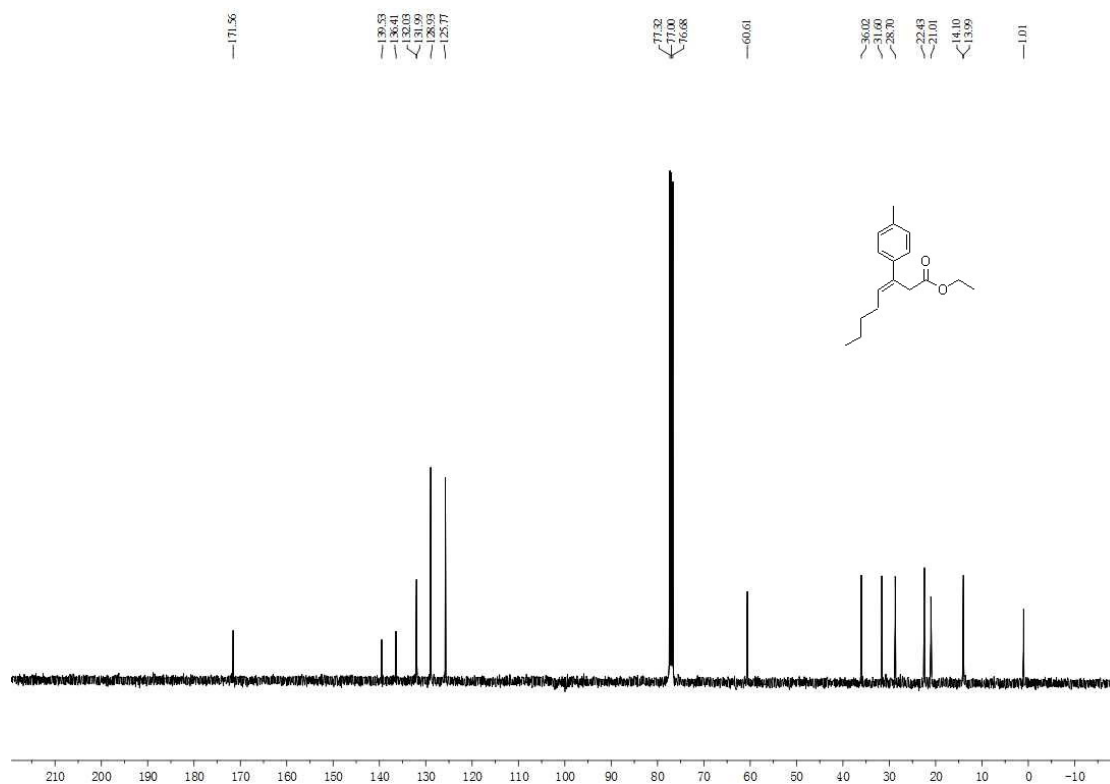



**Product 5a**

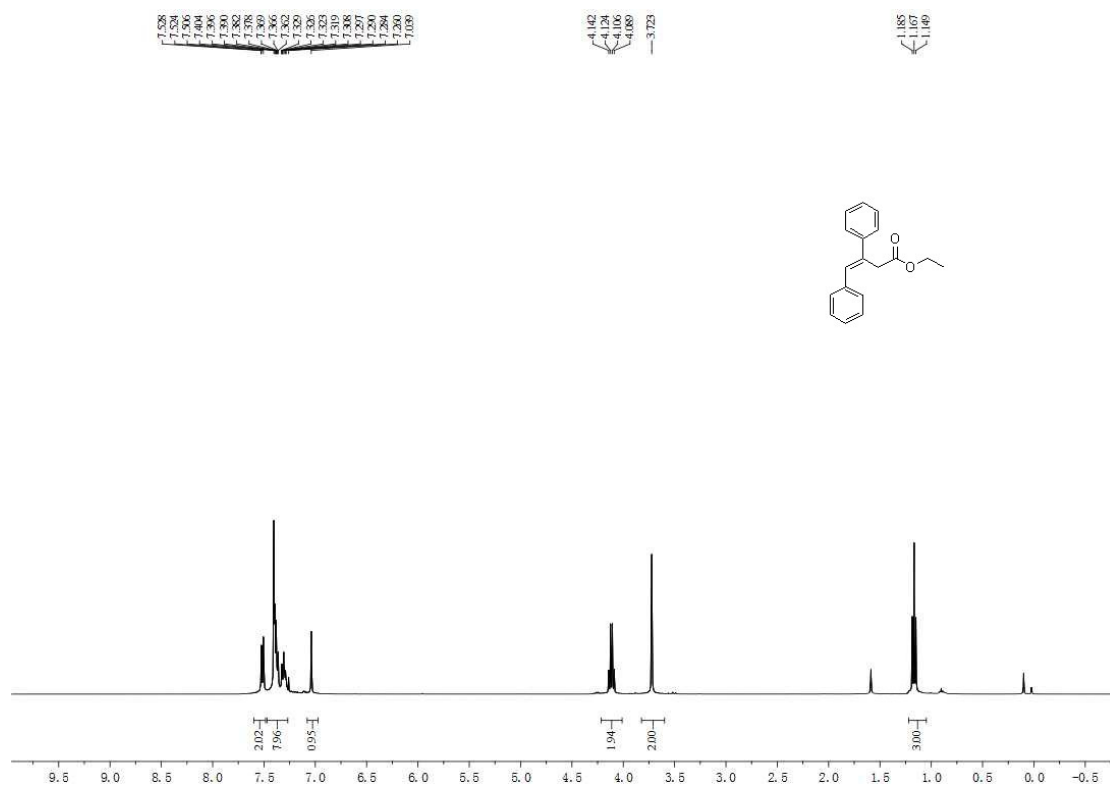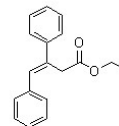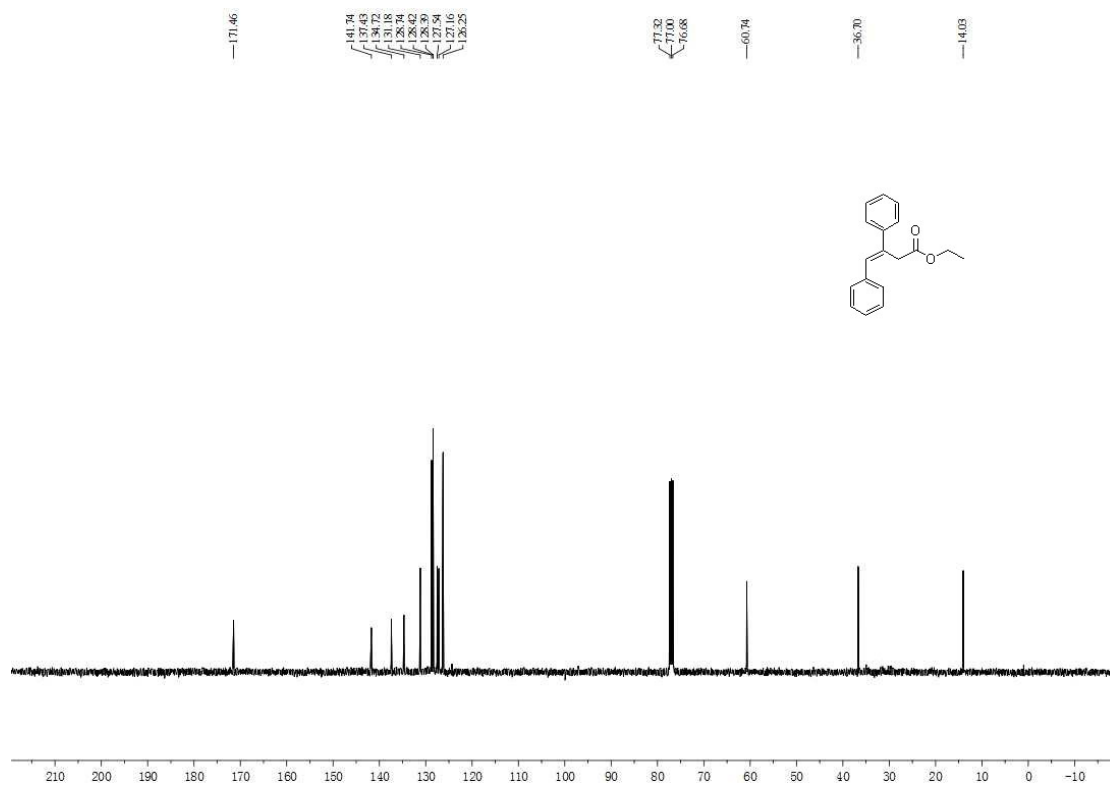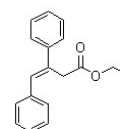

# Product 5b

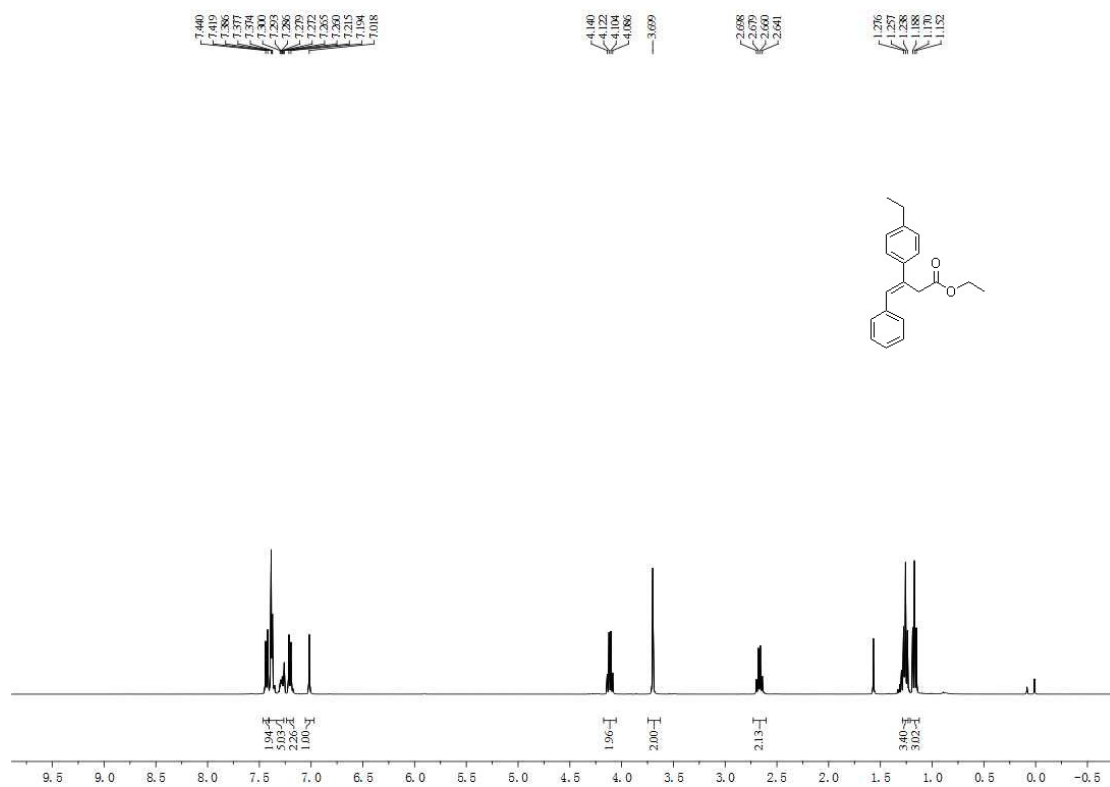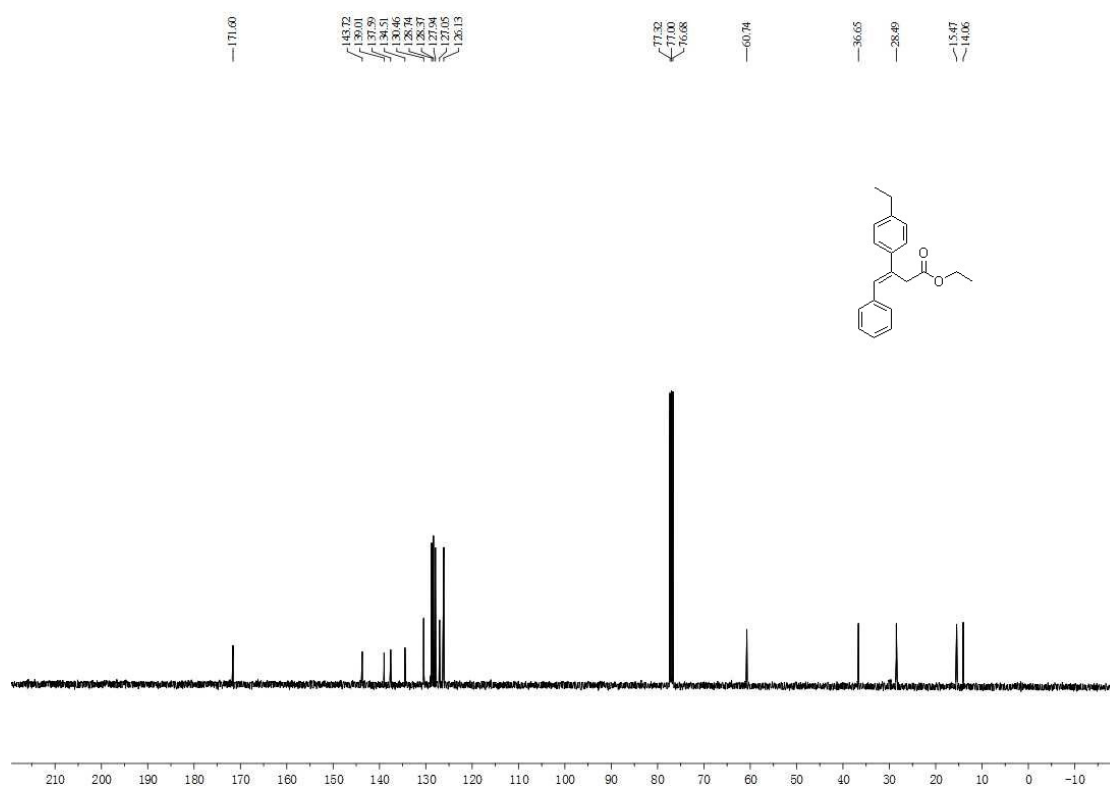

**Product 5c**

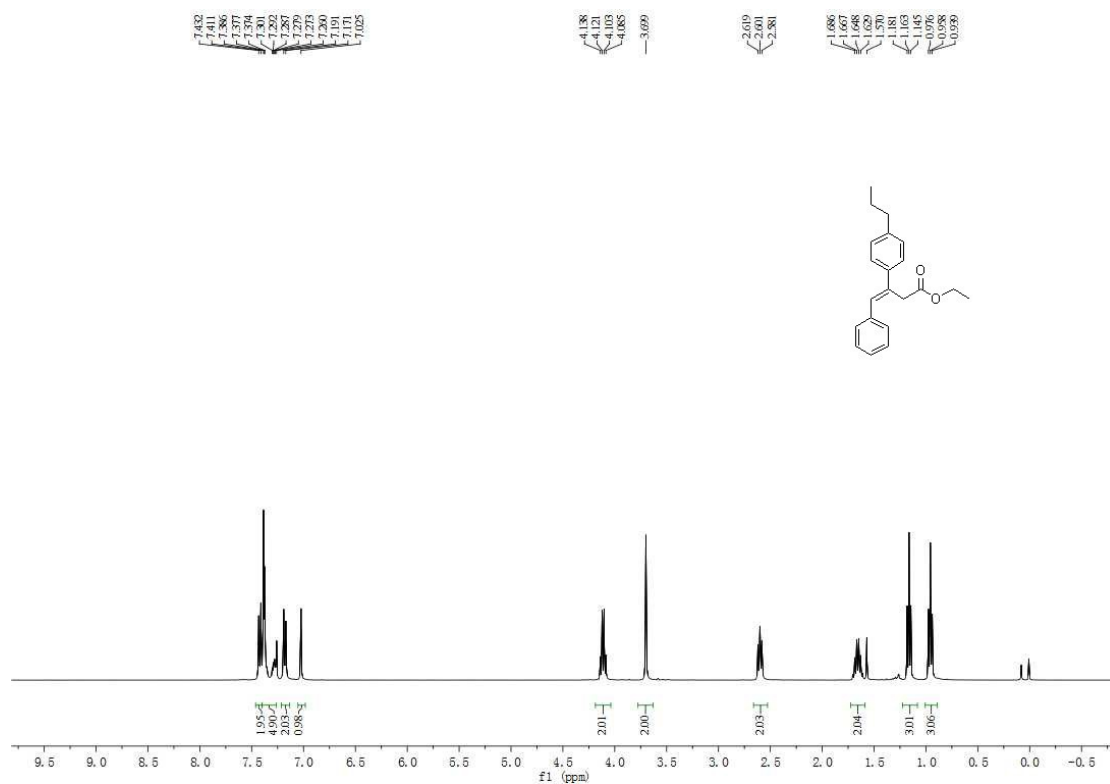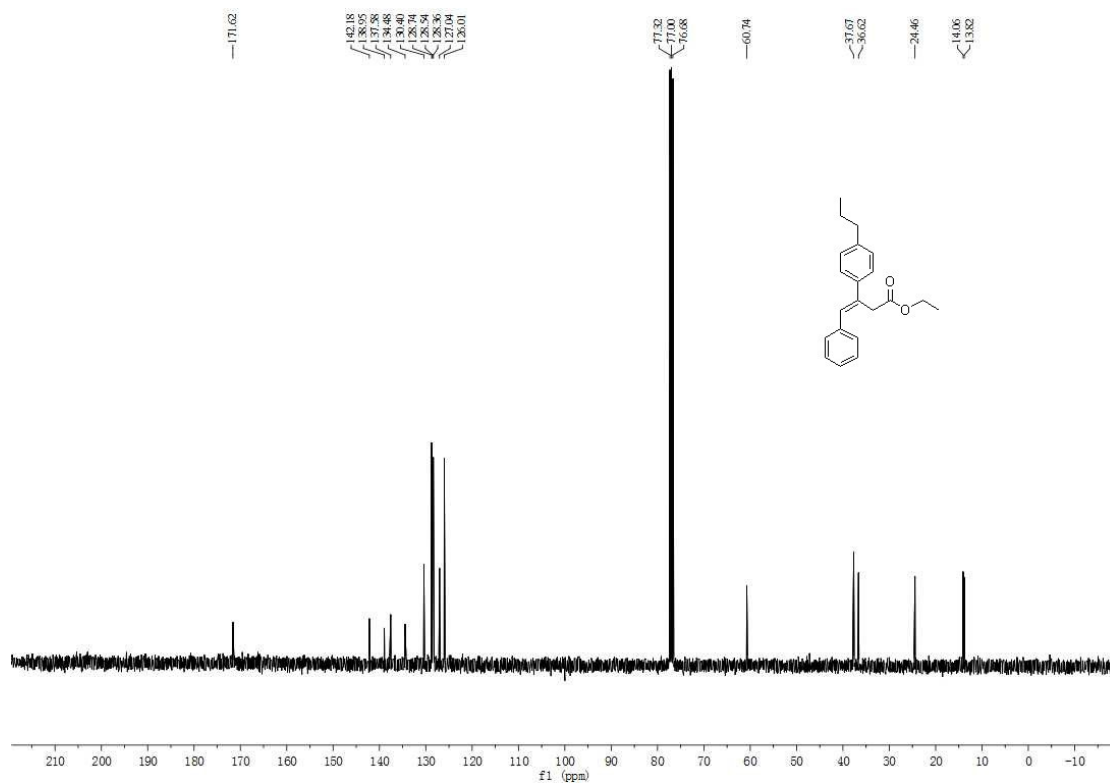

**Product 5d**

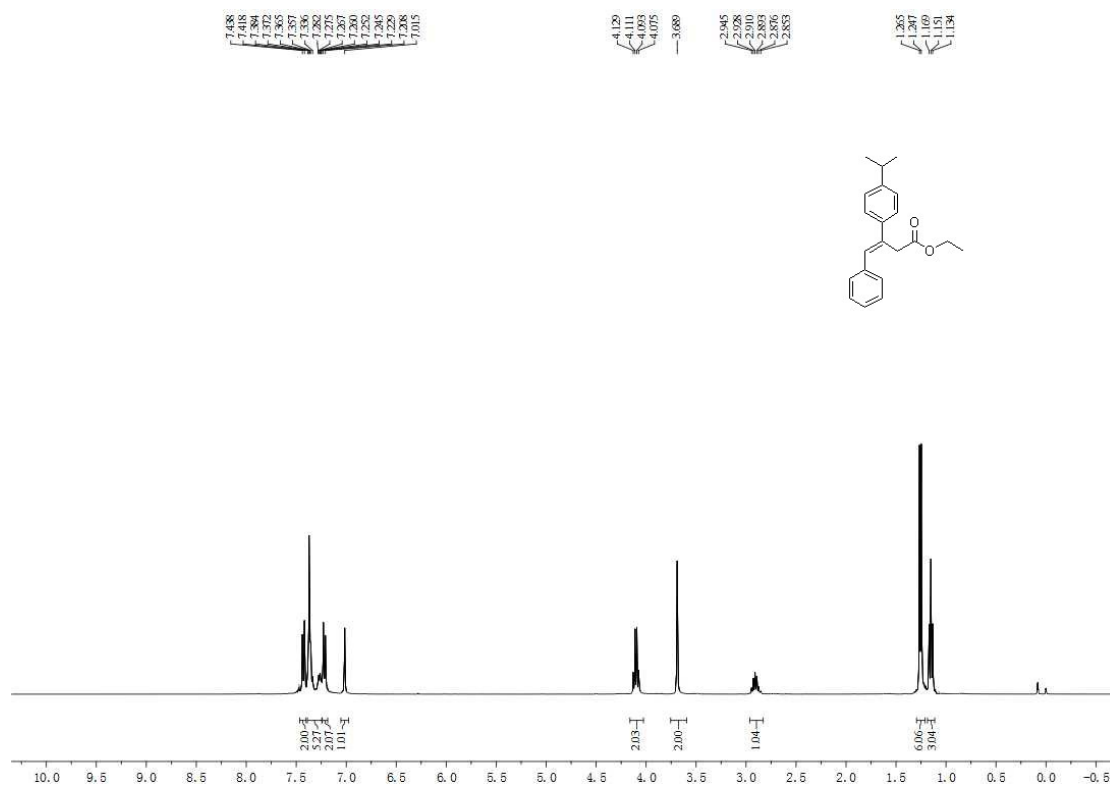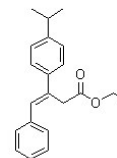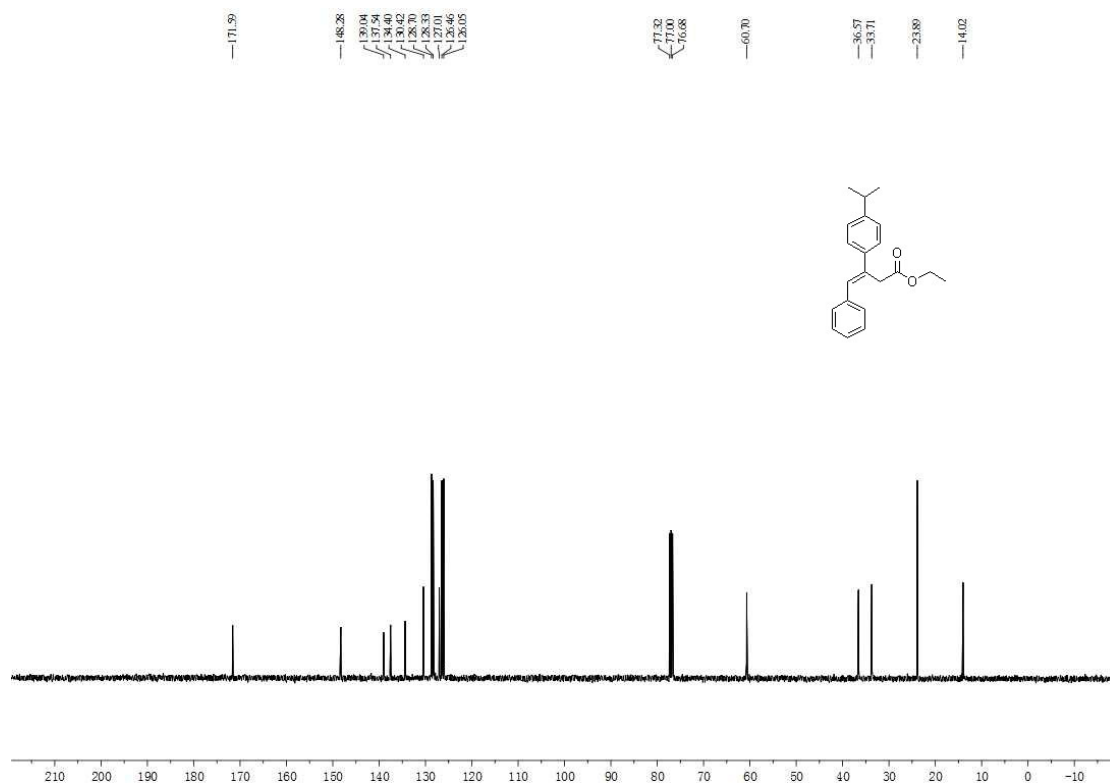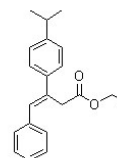

**Product 5e**

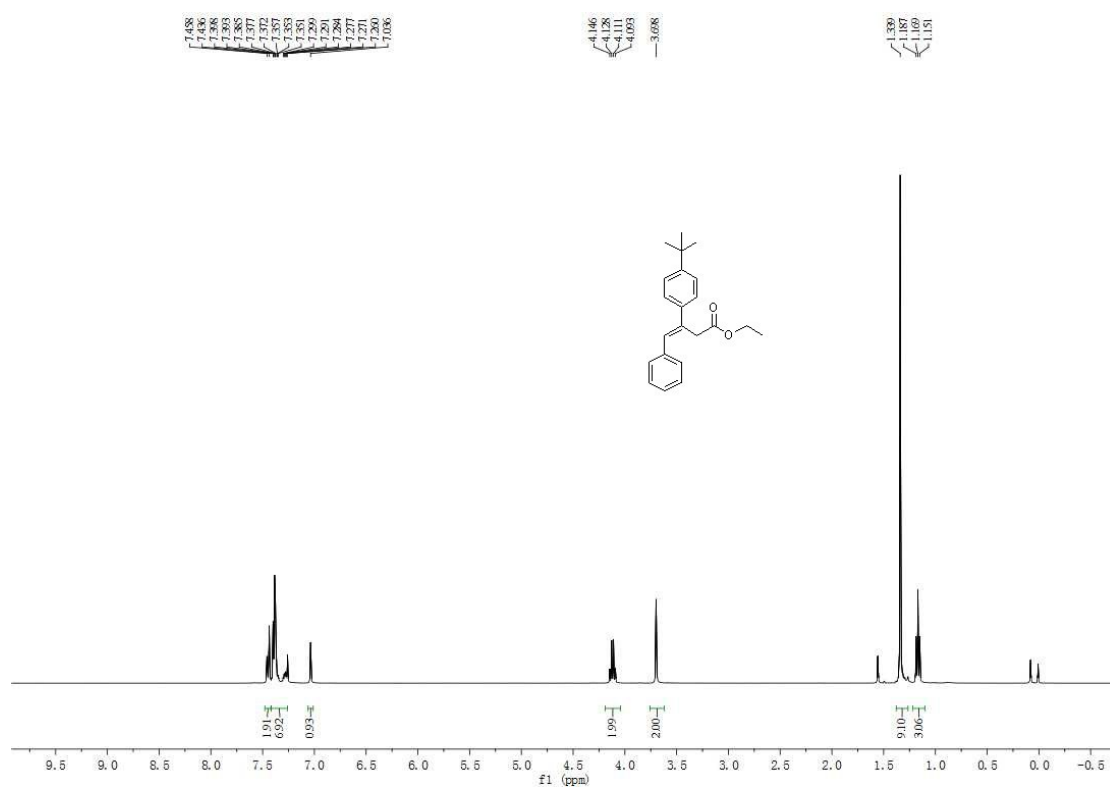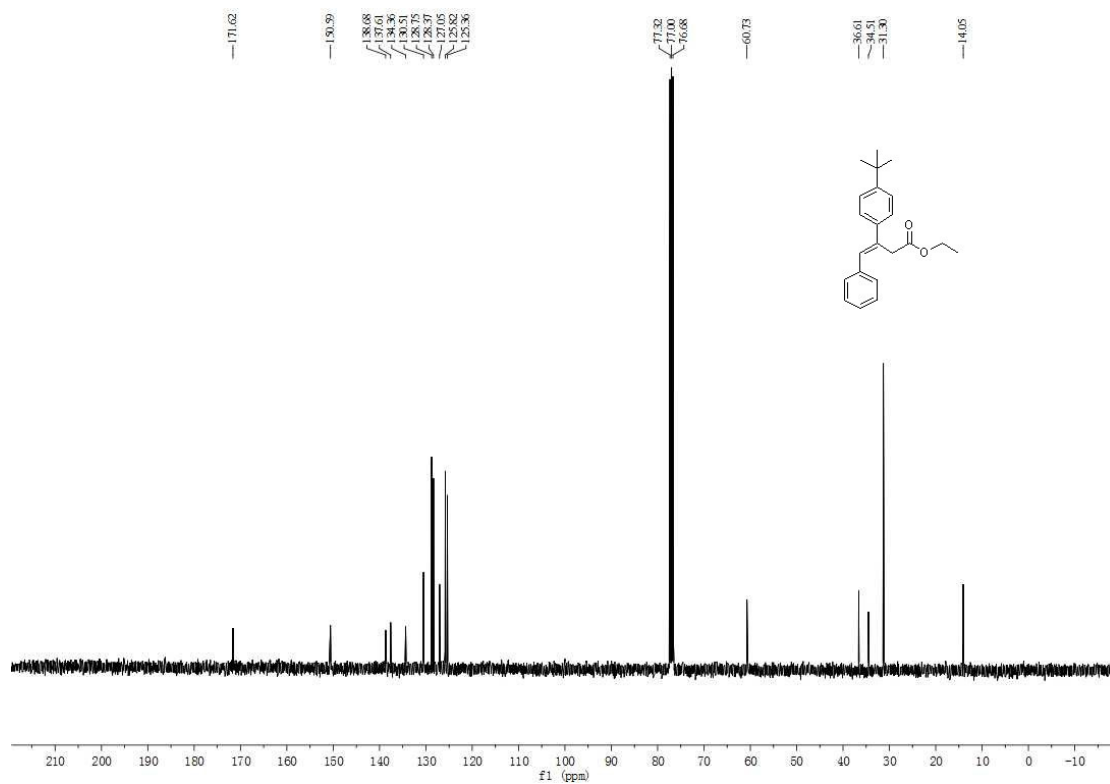

**Product 5f**

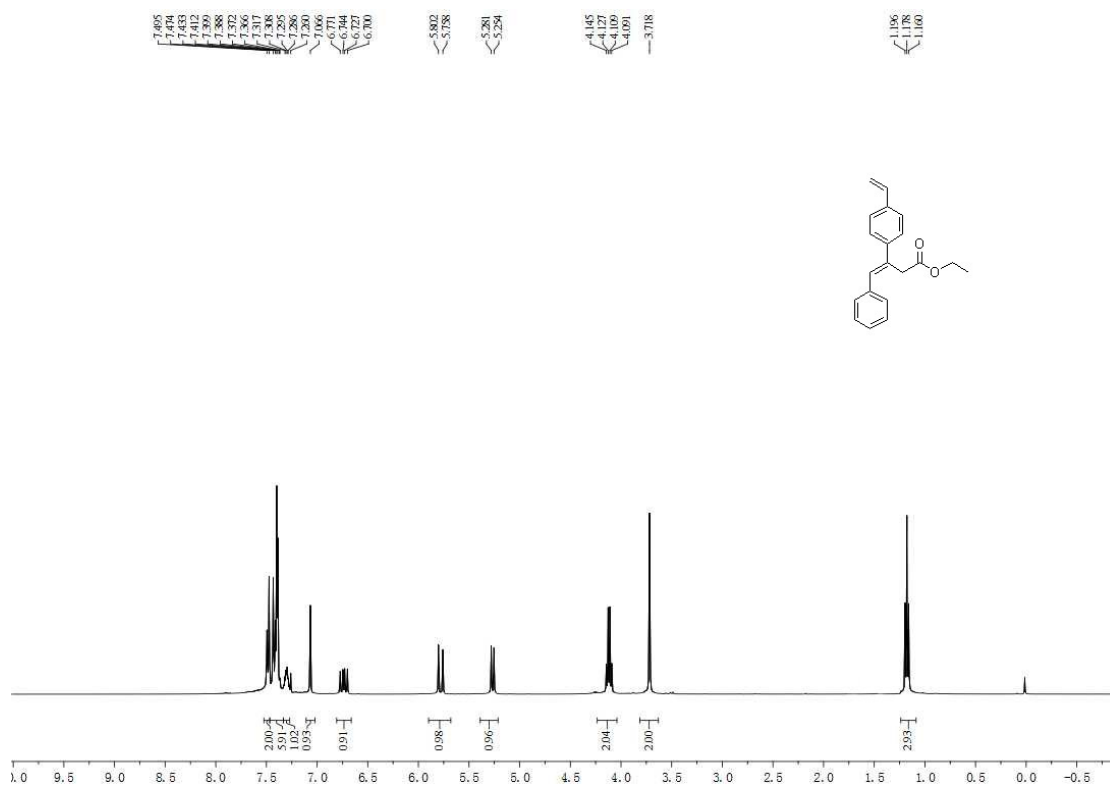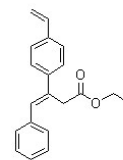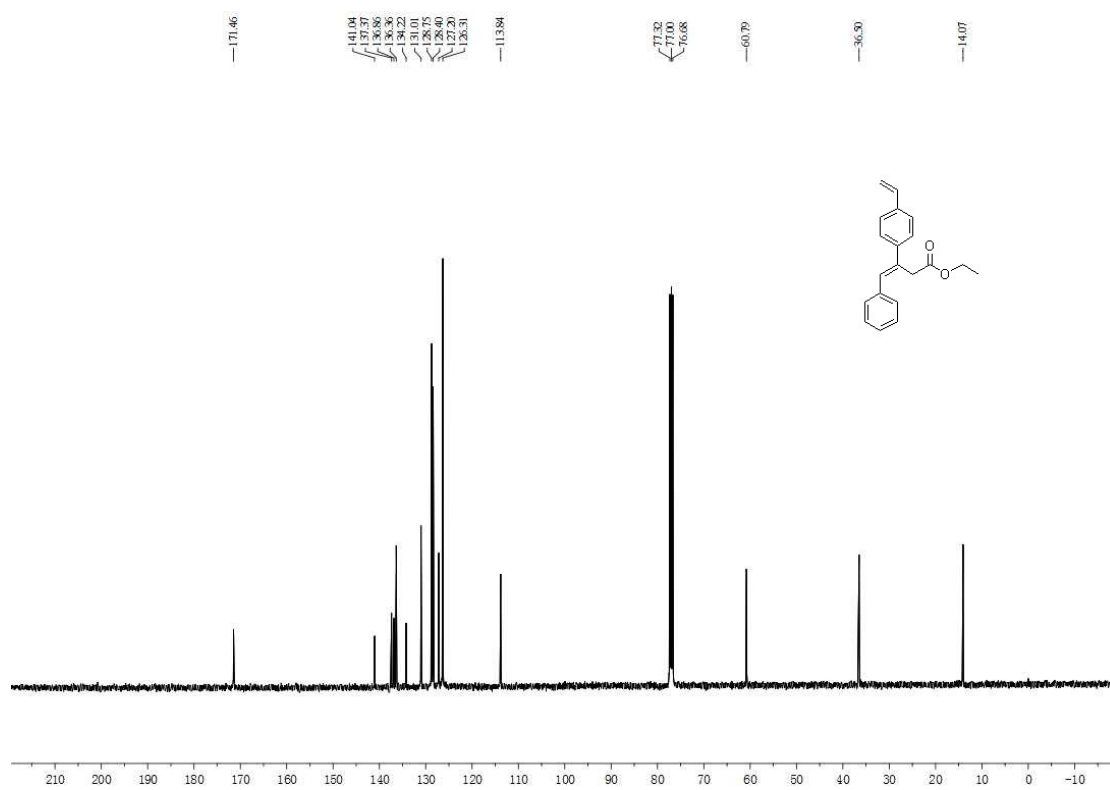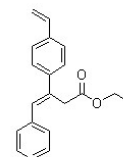

# Product 5g

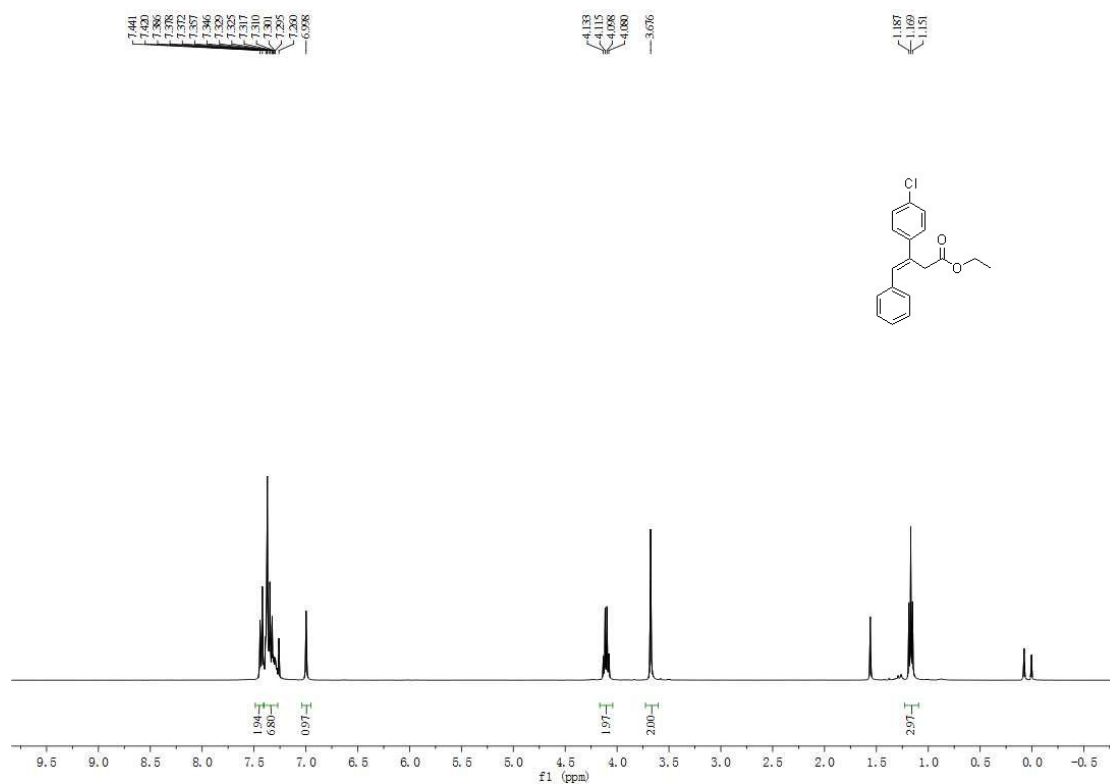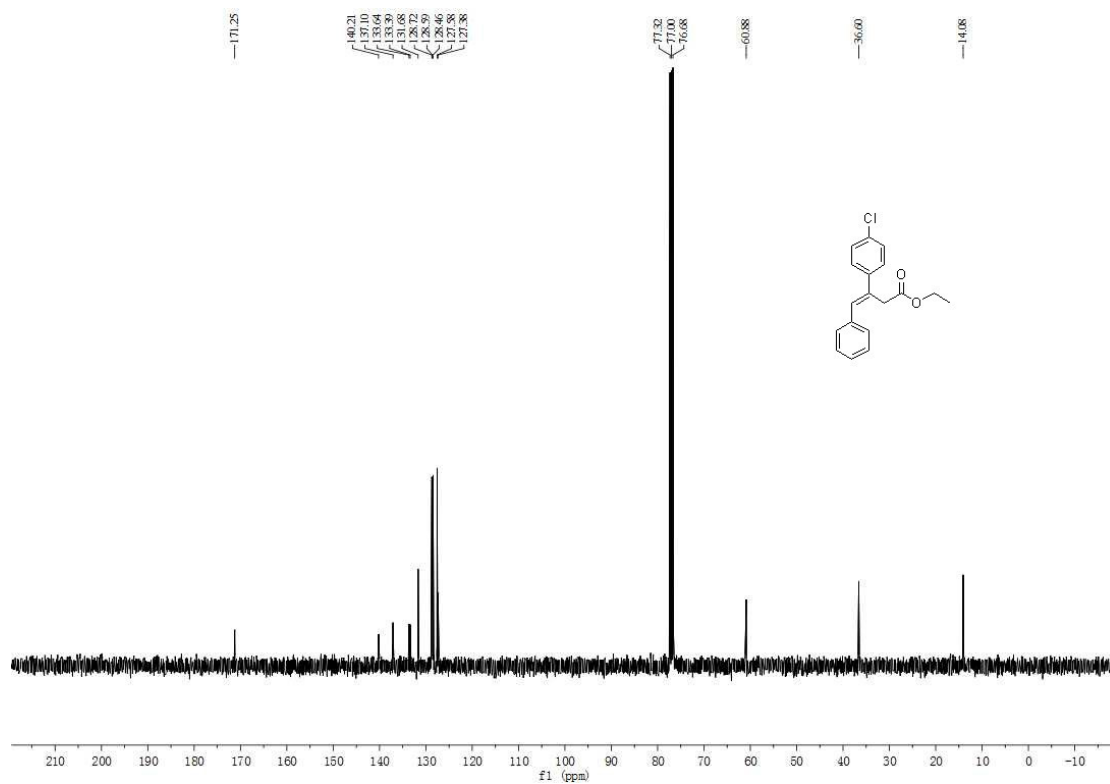

**Product 5h**

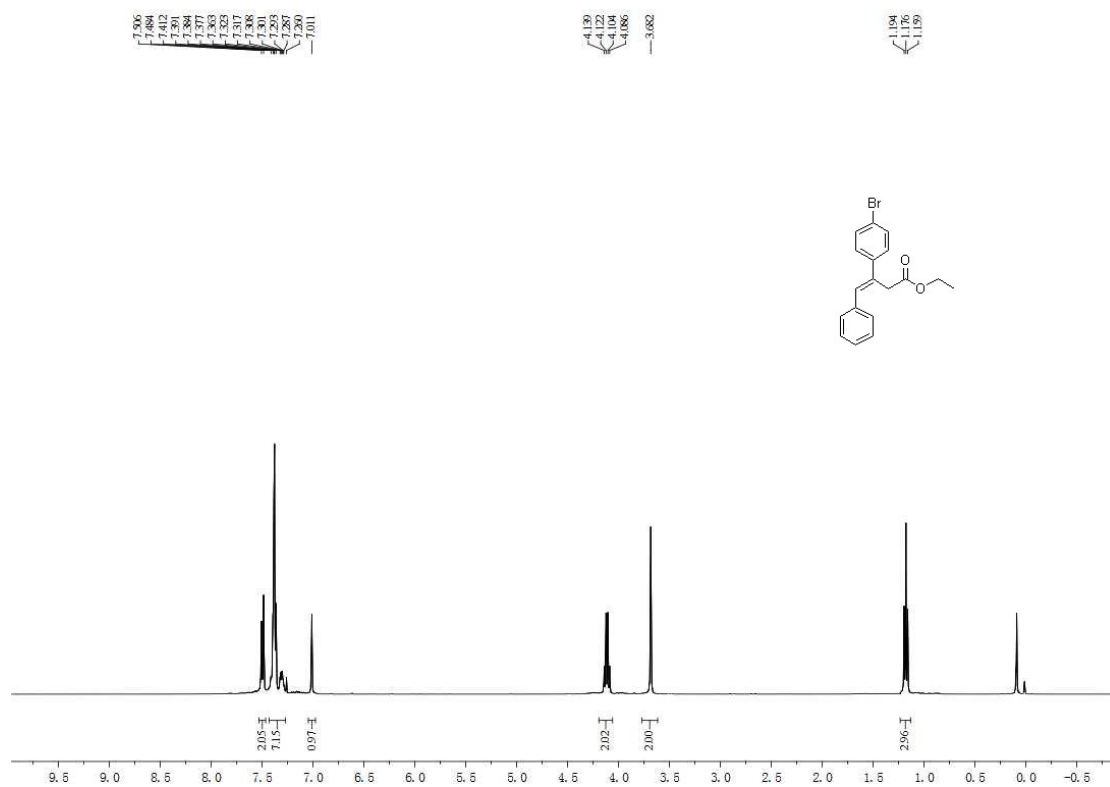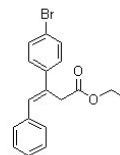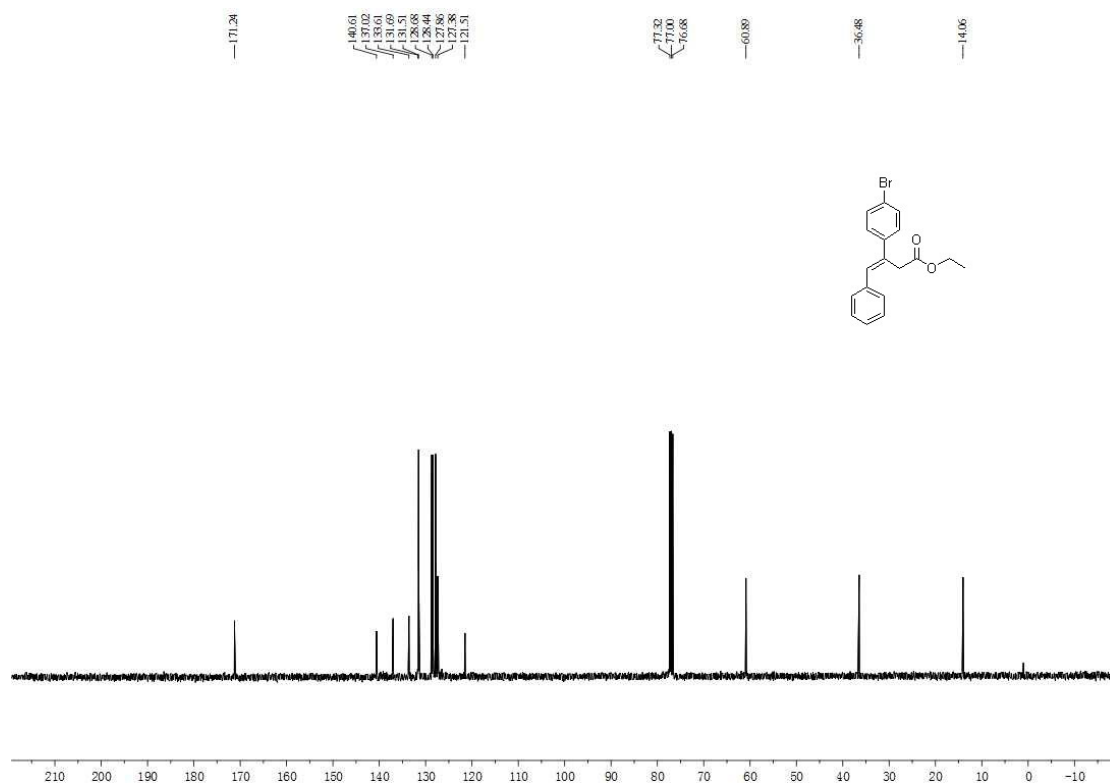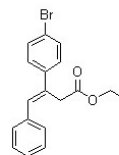



# Product 5i

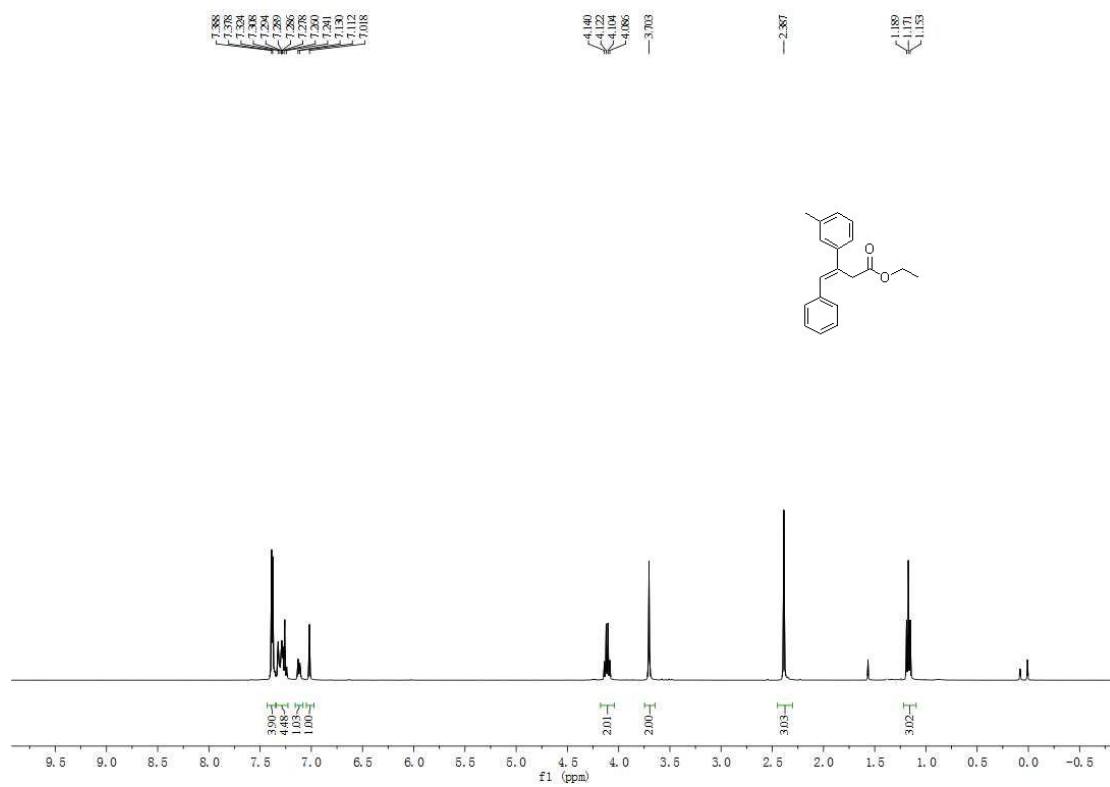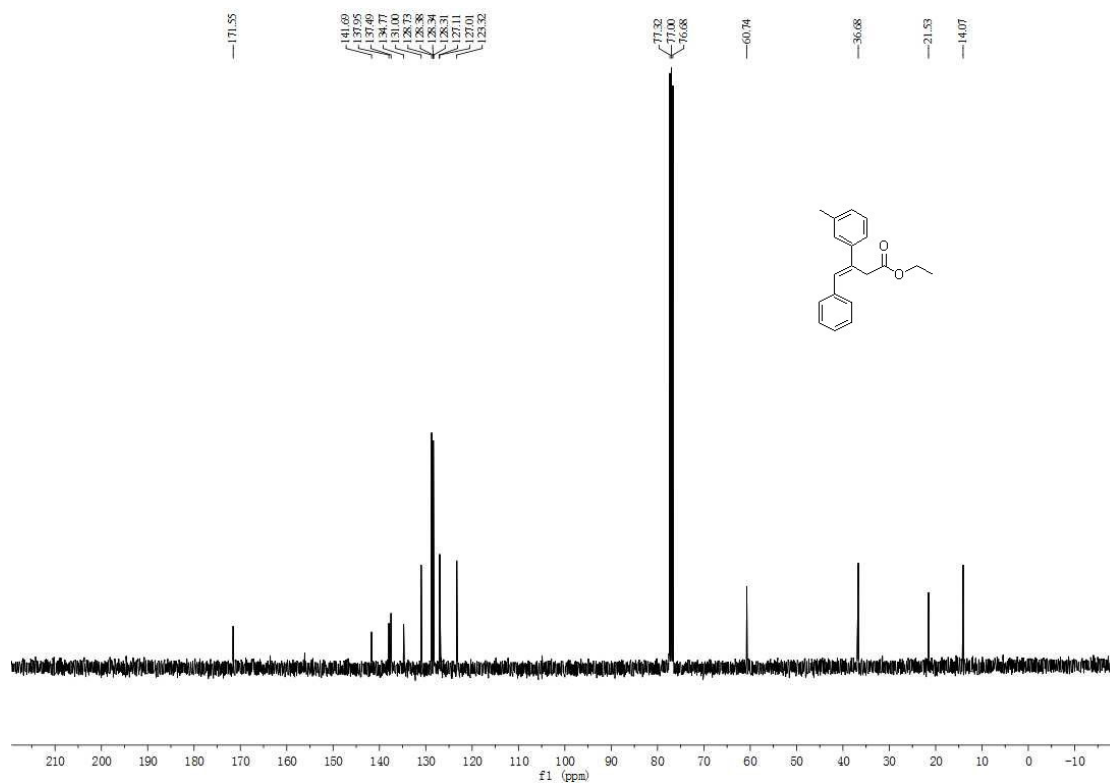

**Product 5j**

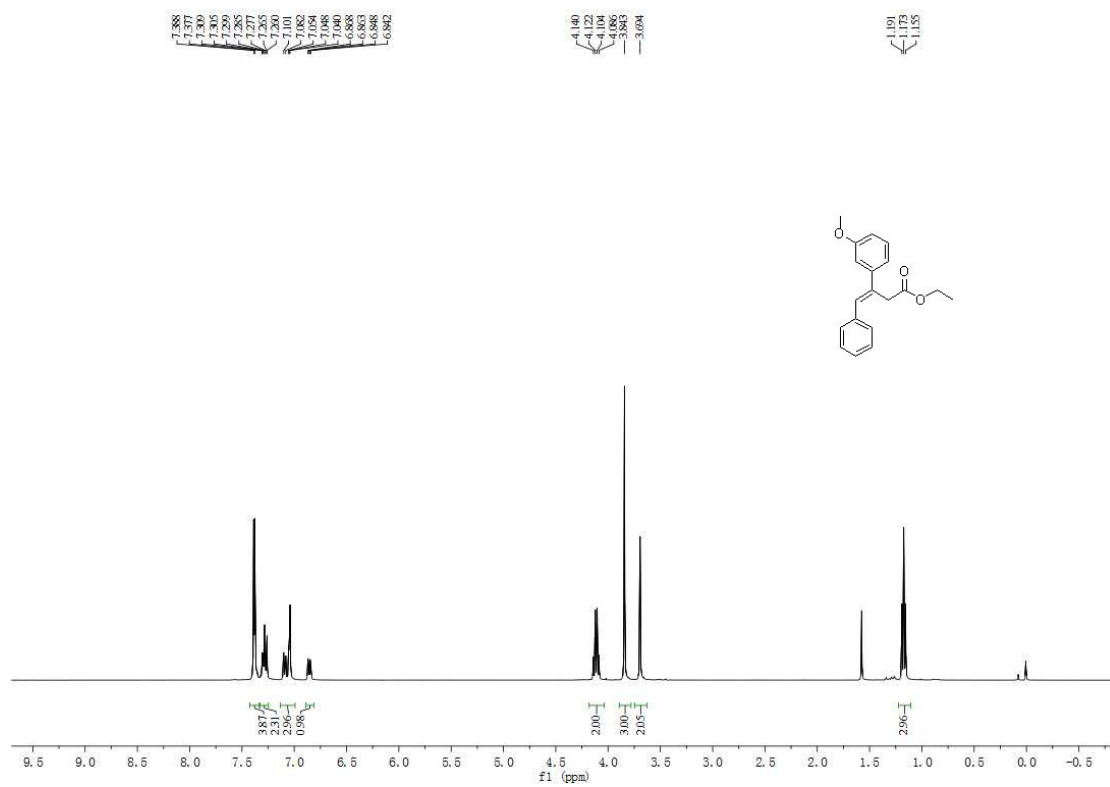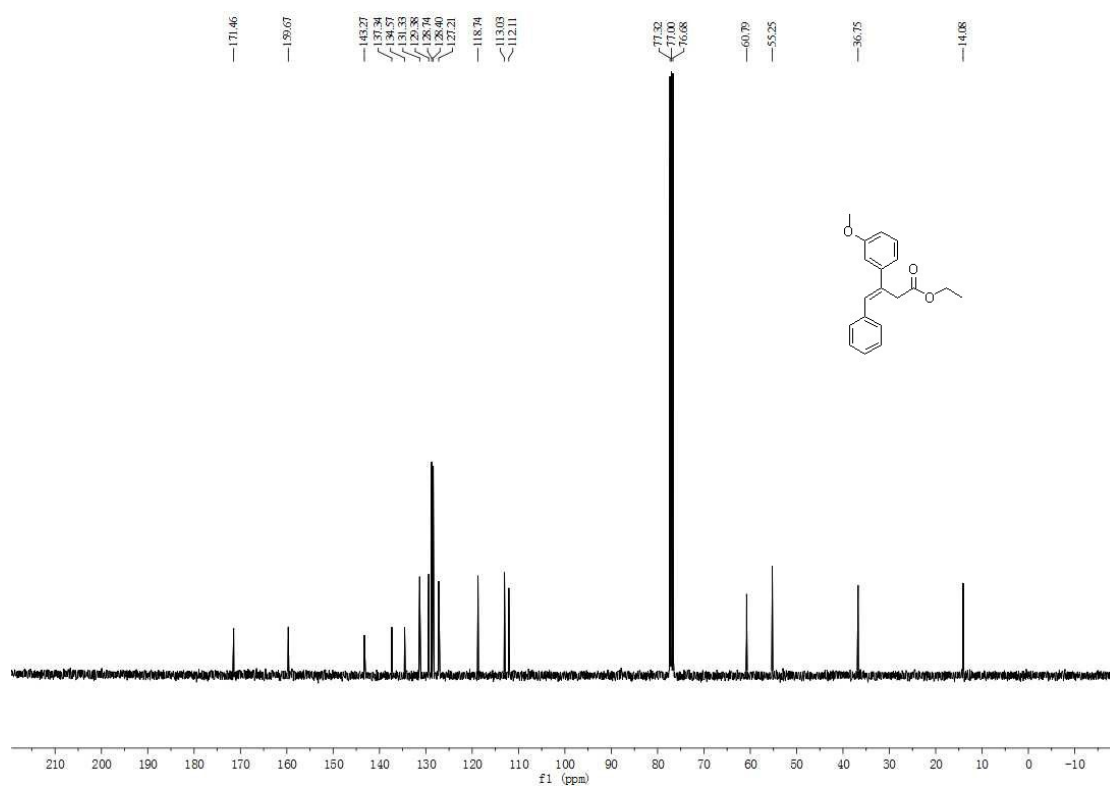

**Product 5k**

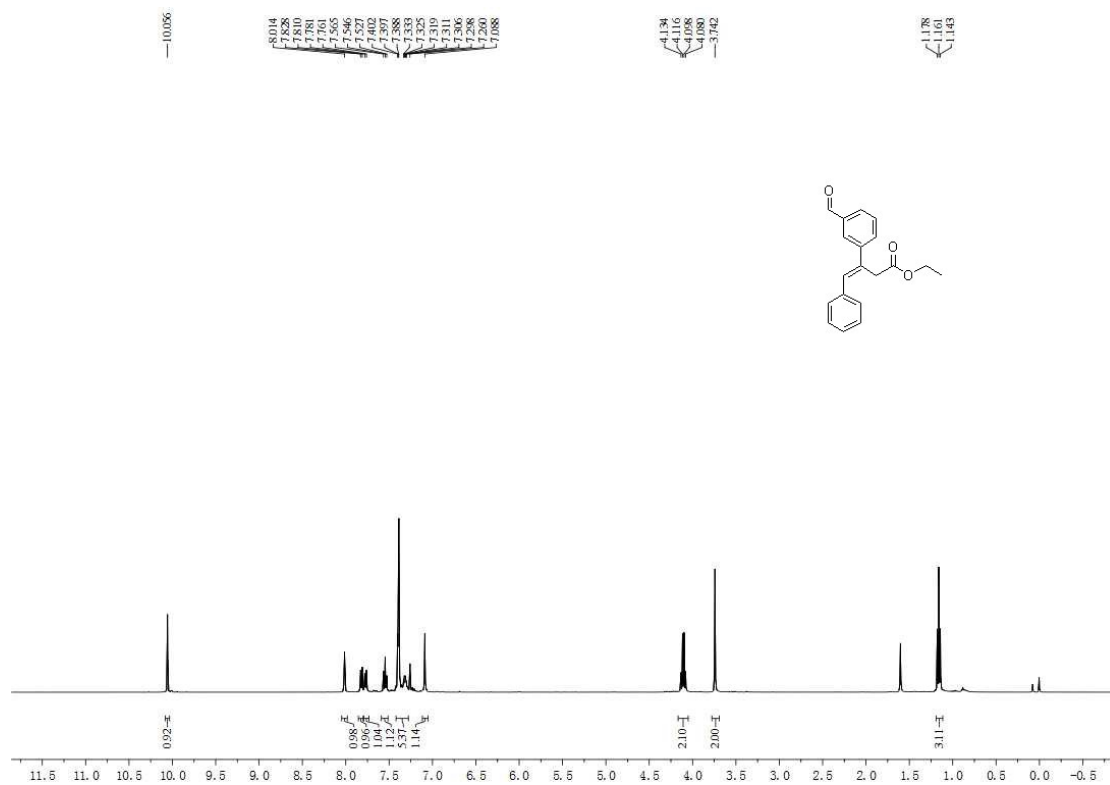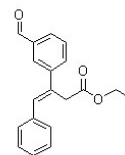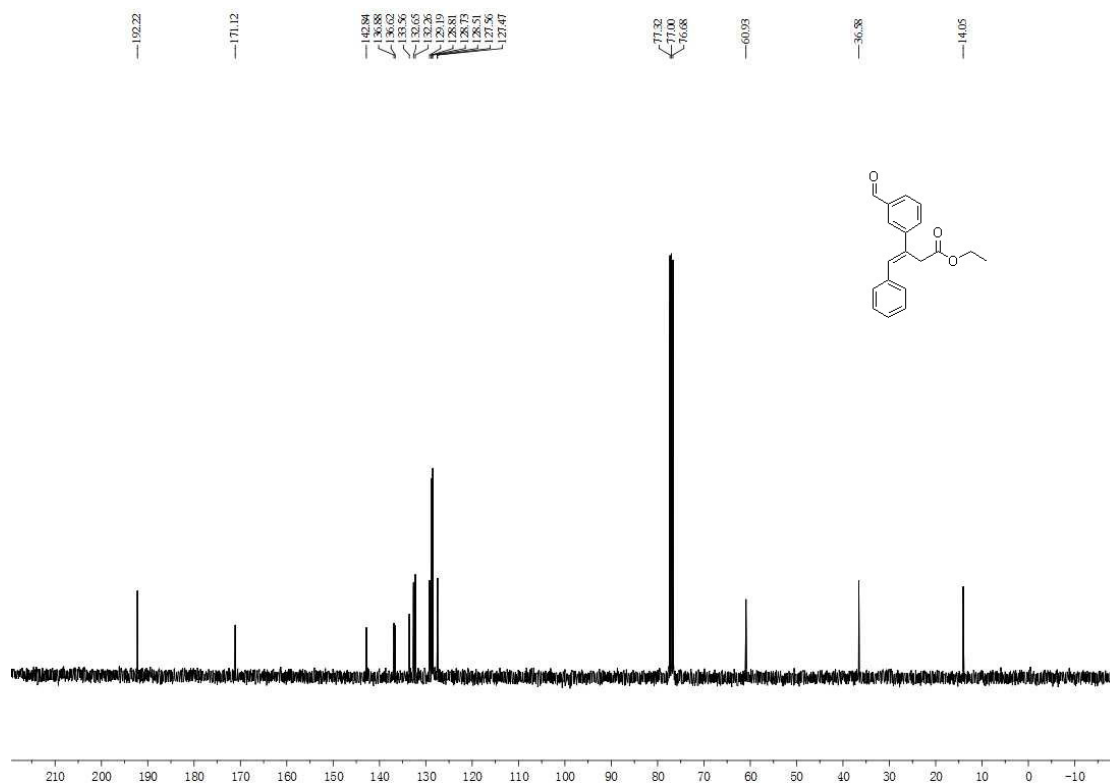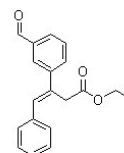

**Product 5I**

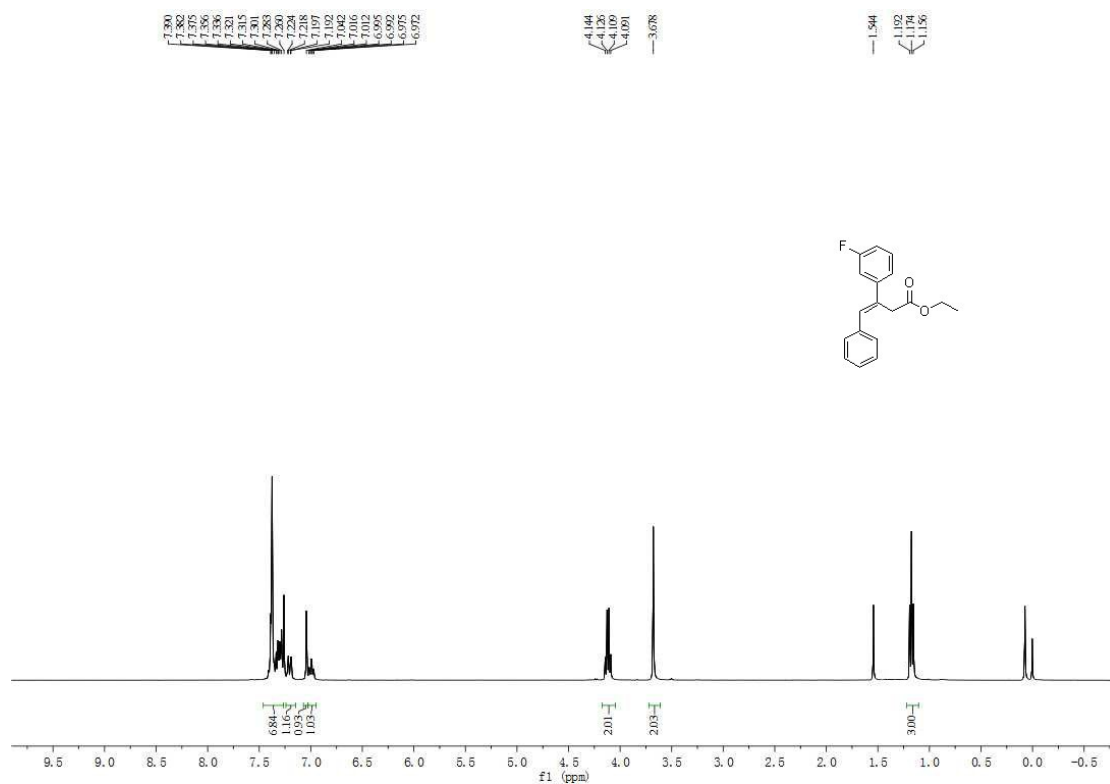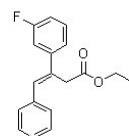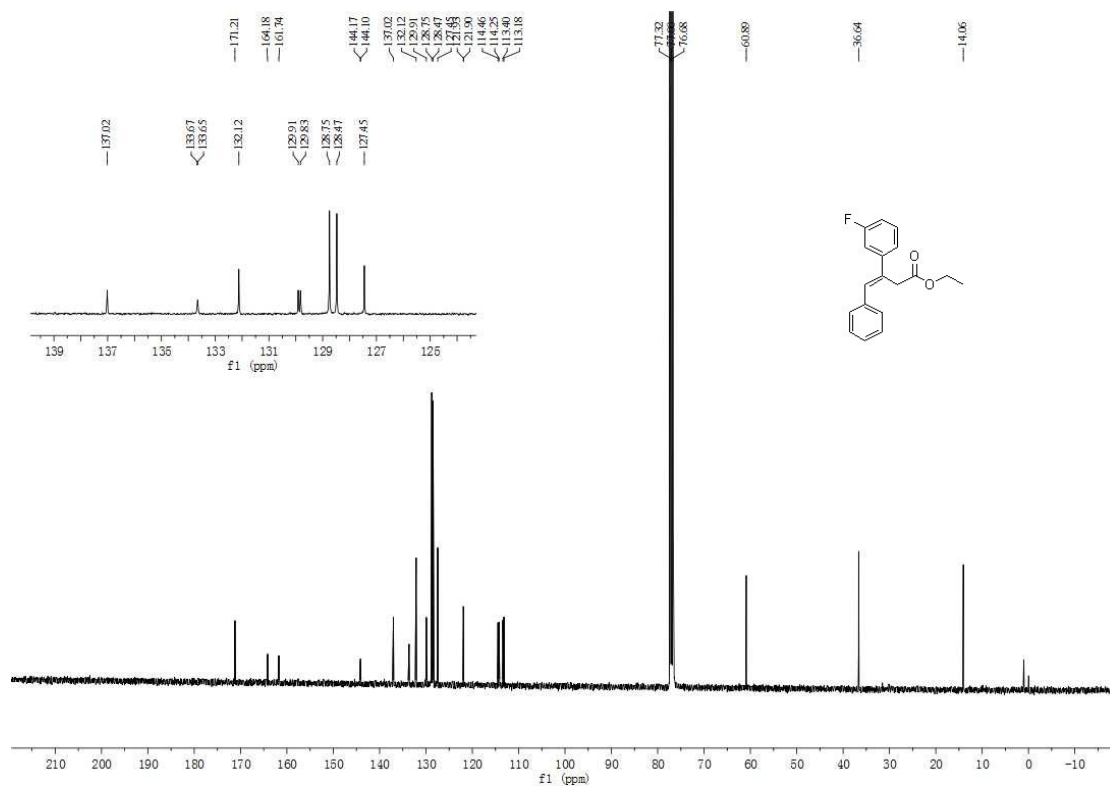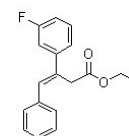

# Product 5m

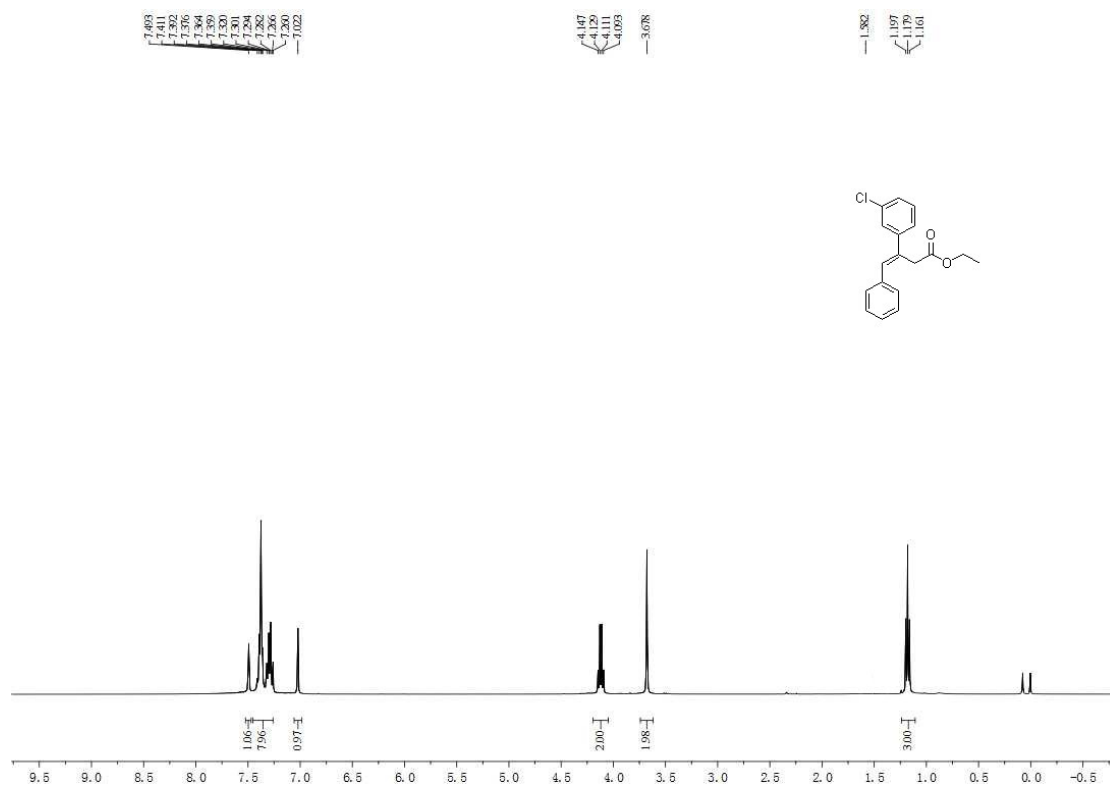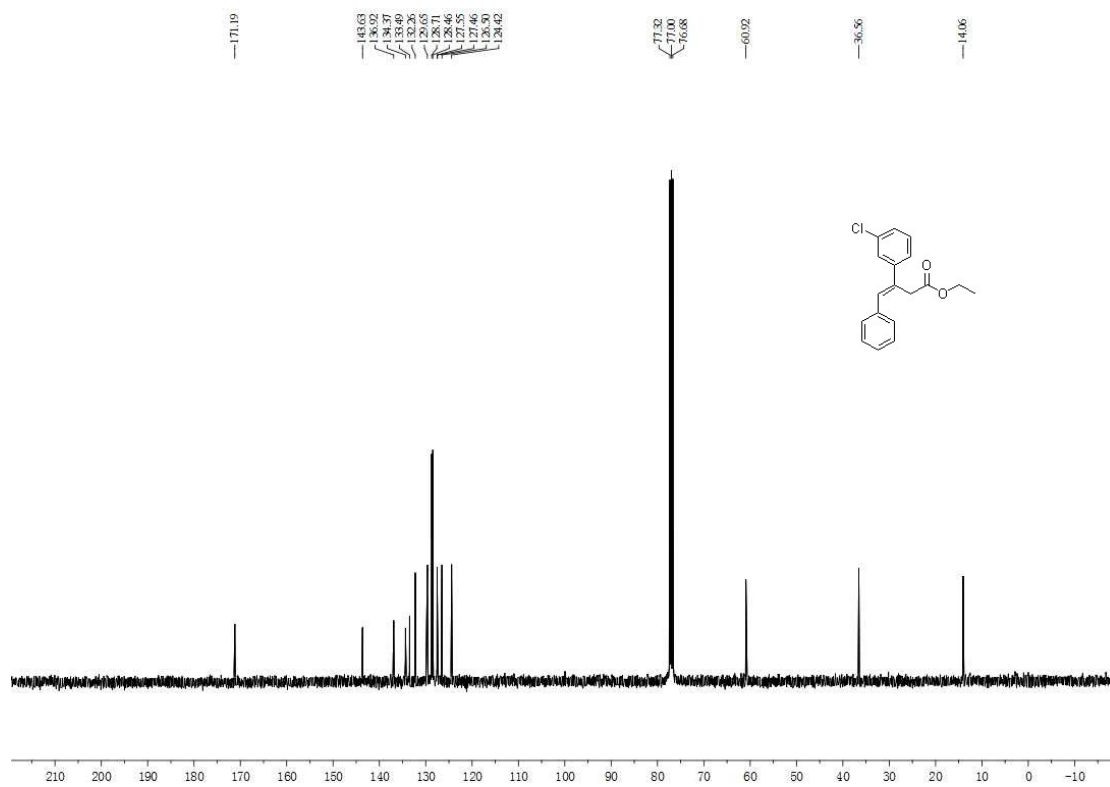

**Product 5n**

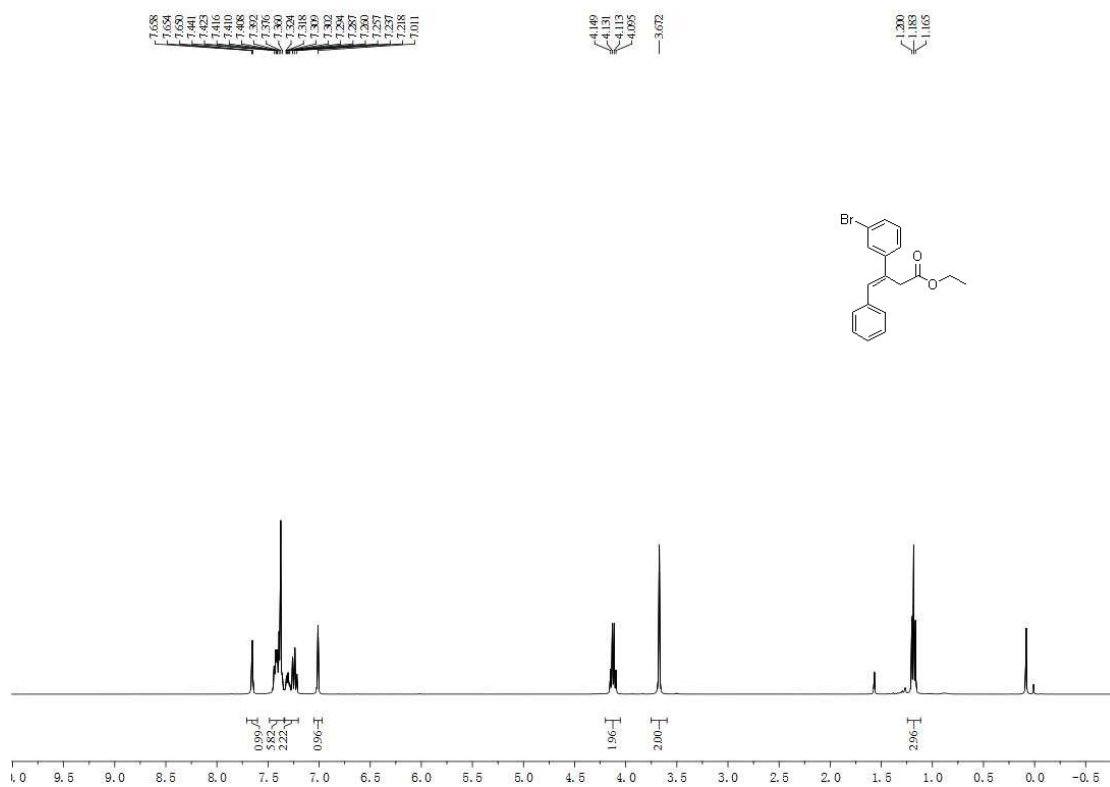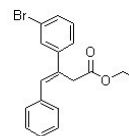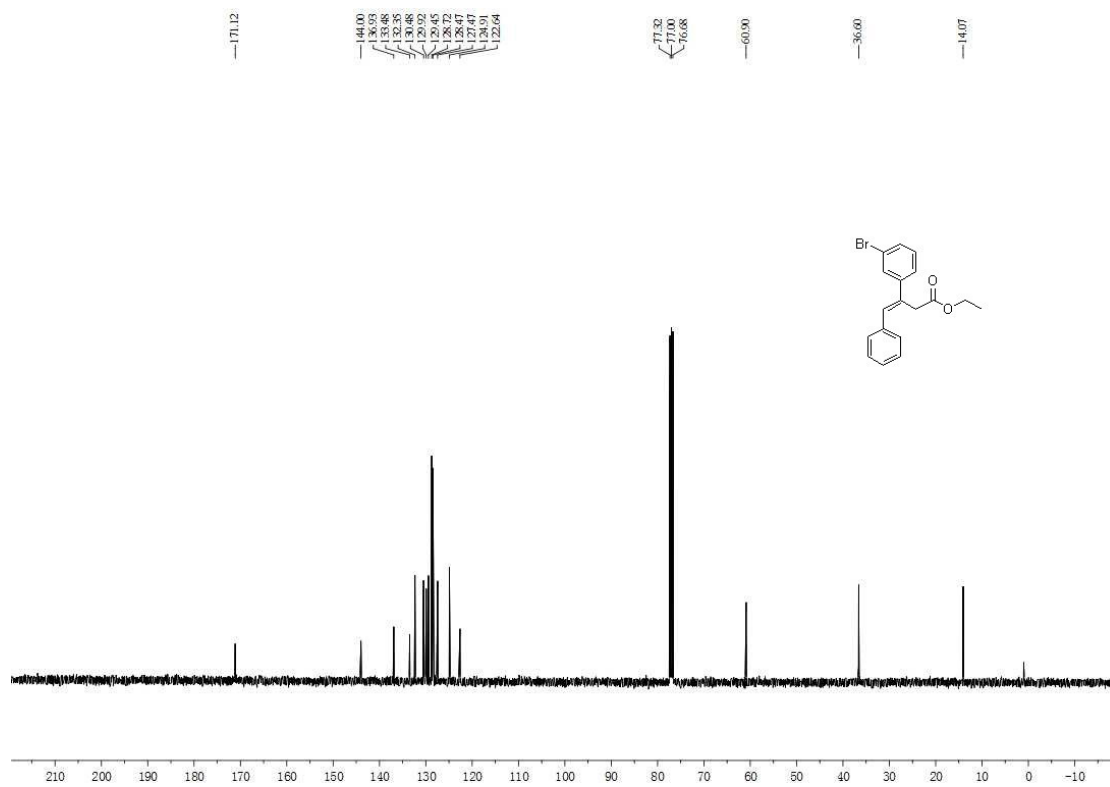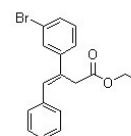

**Product 5o**

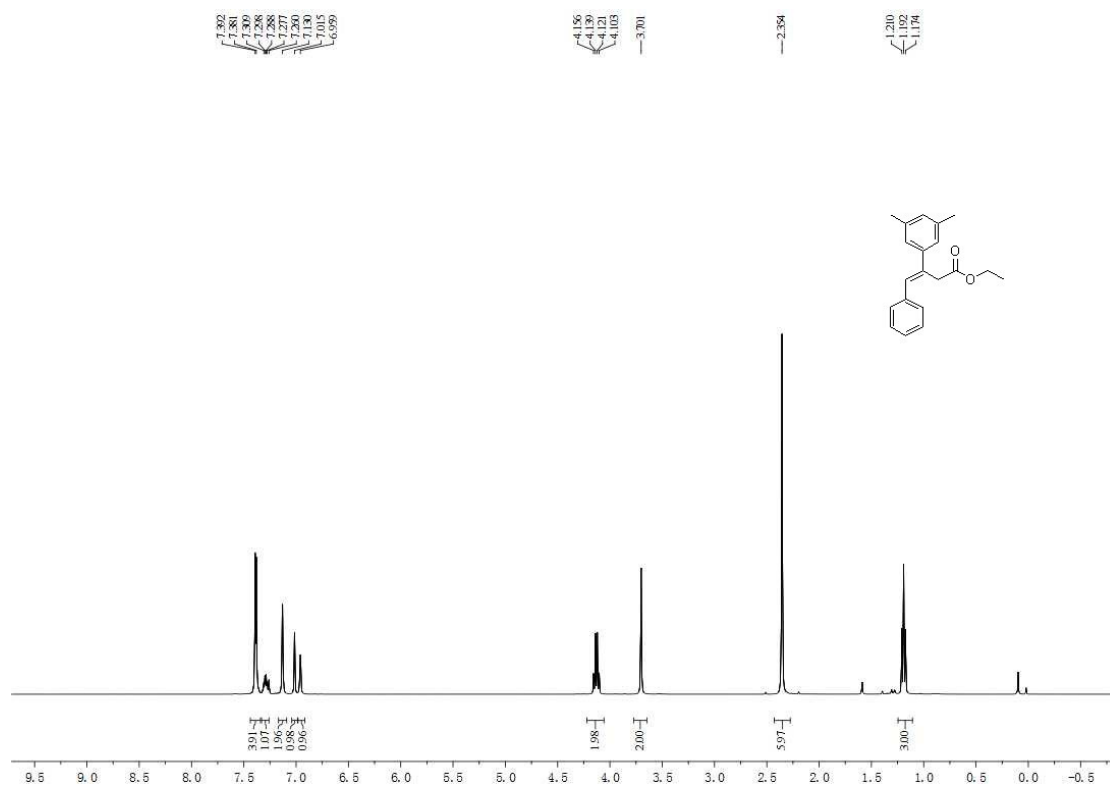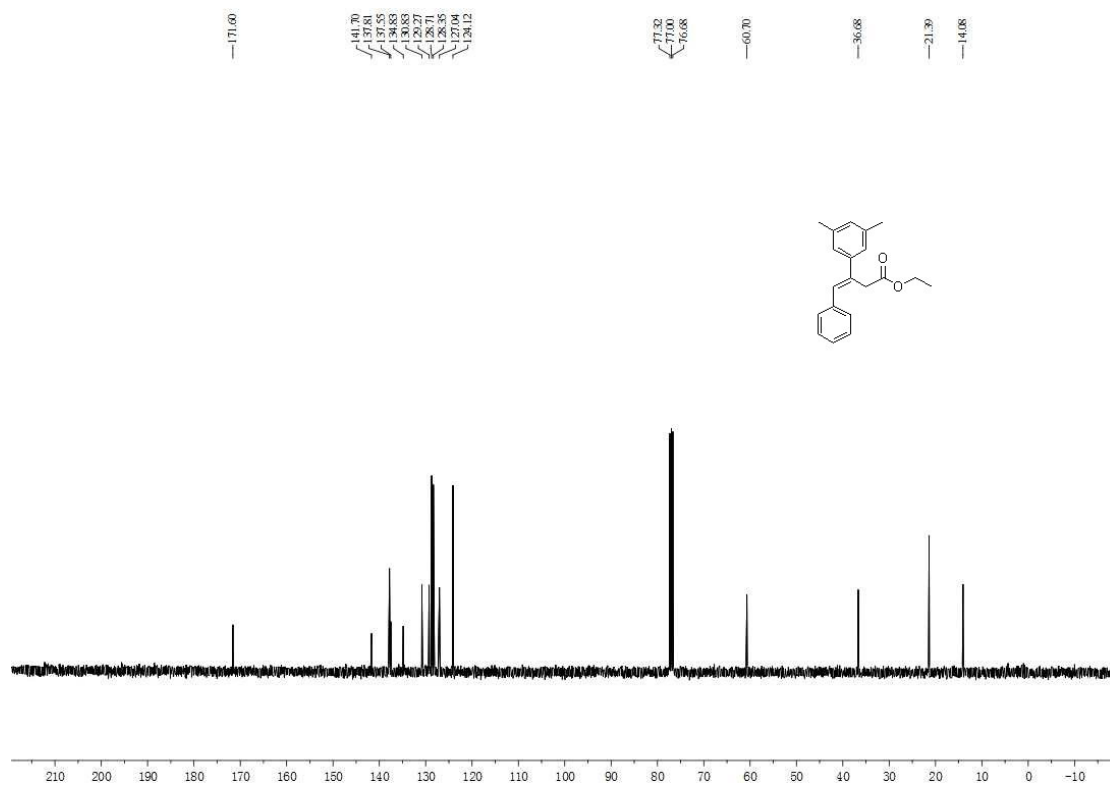

# Product 5p

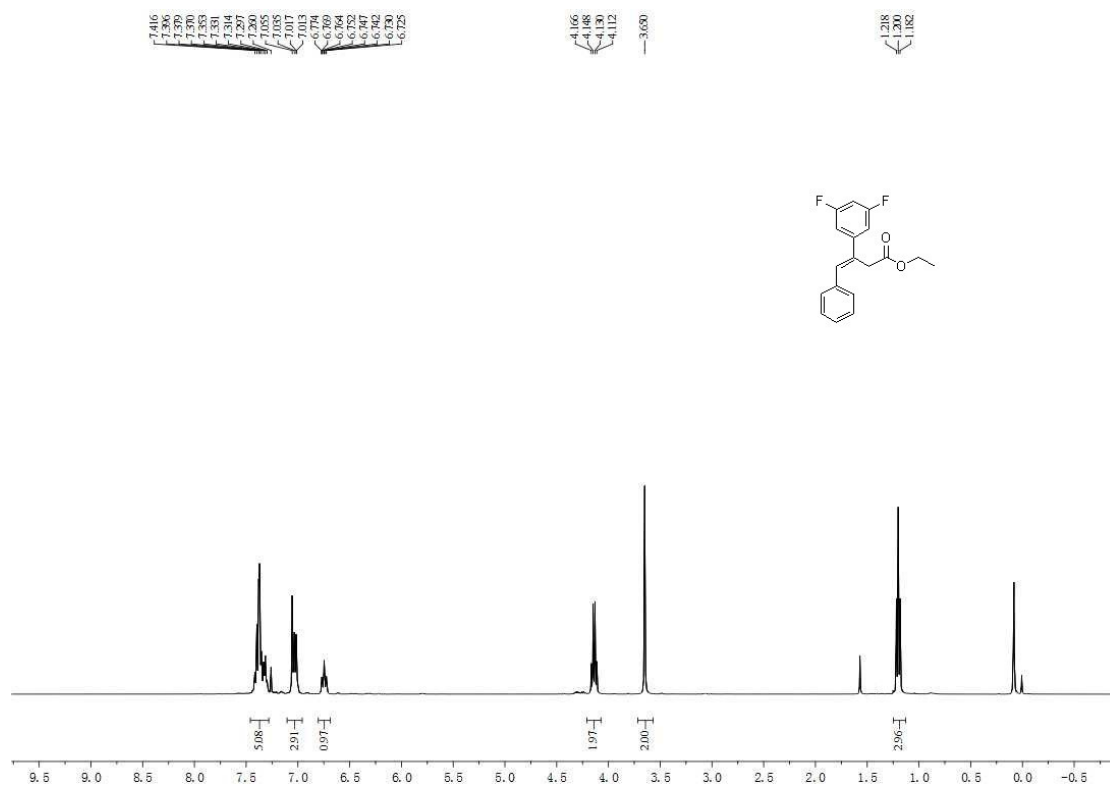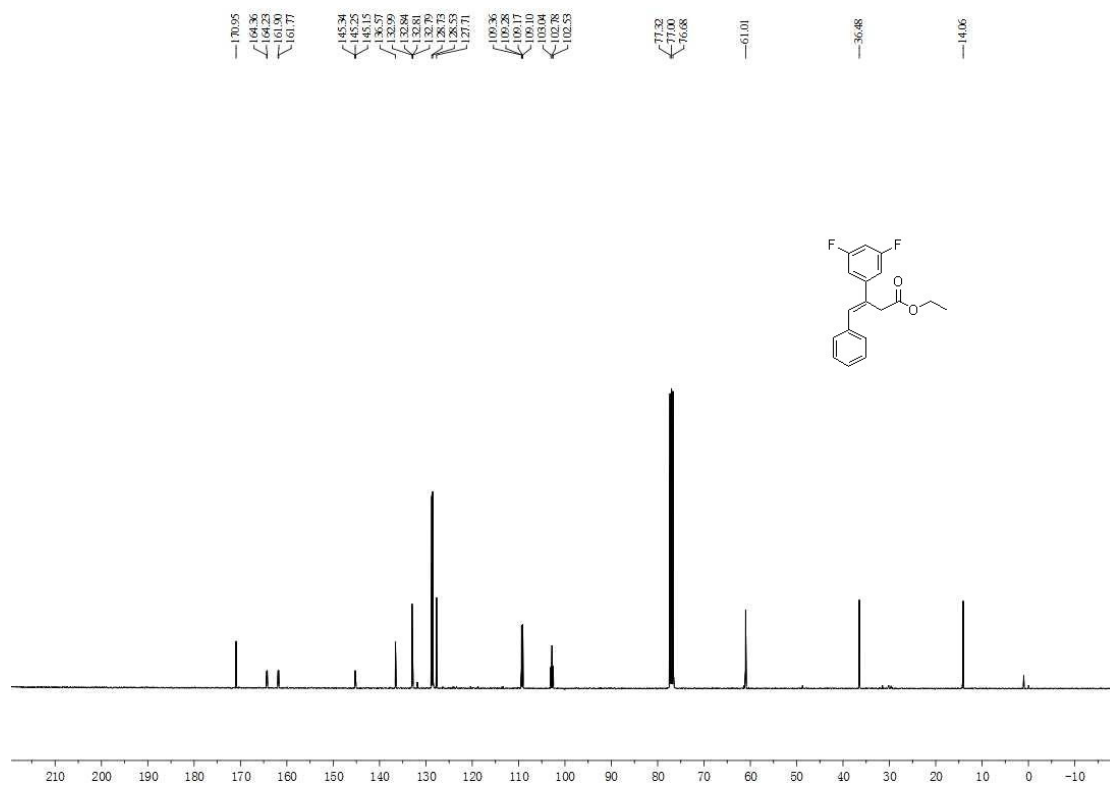



# Product 5q

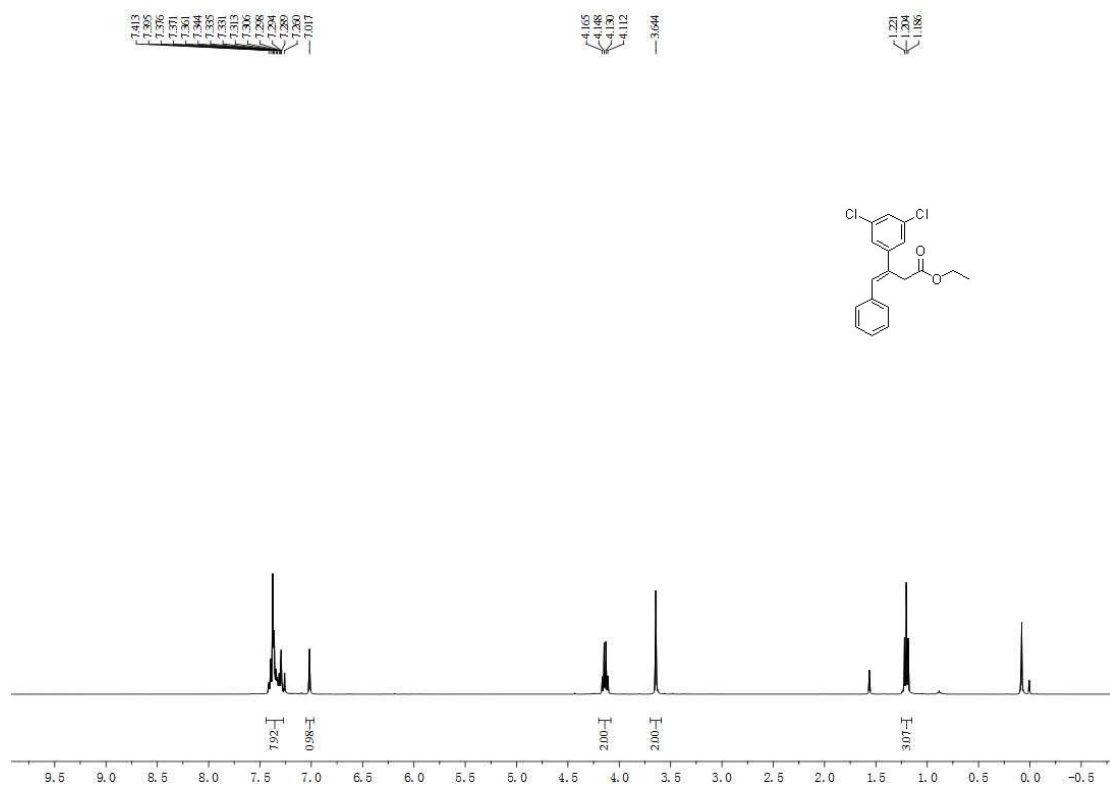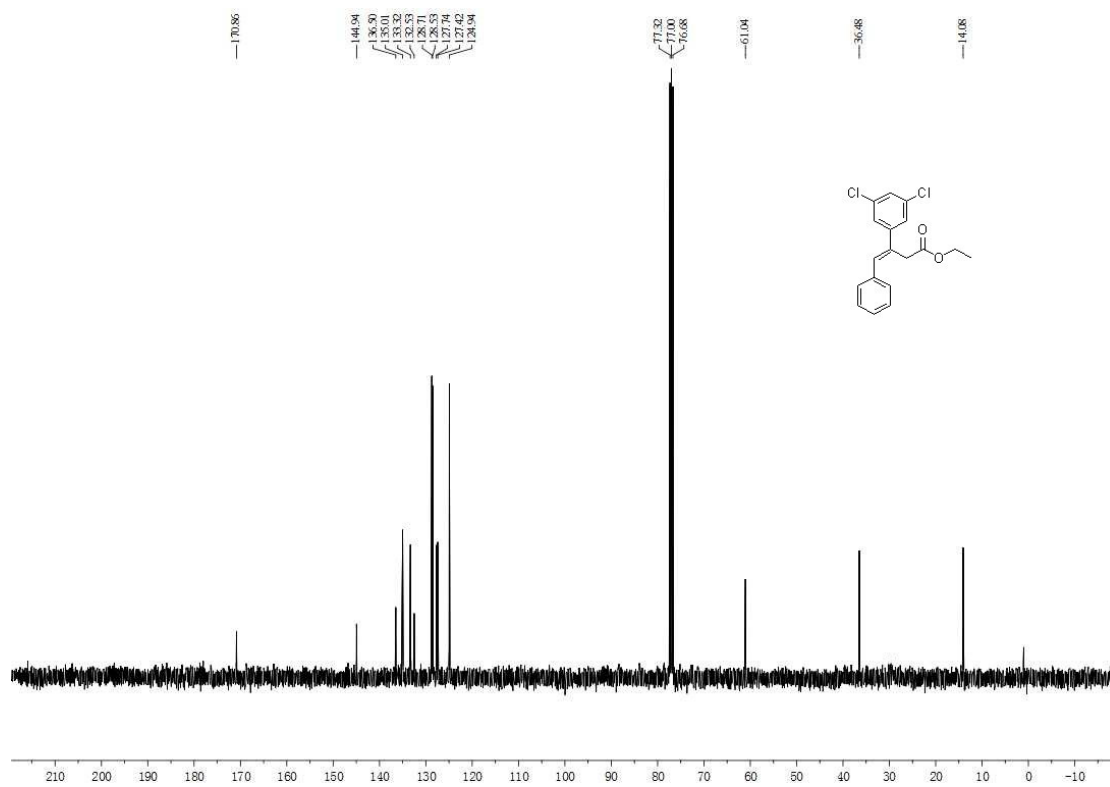

**Product 5r**

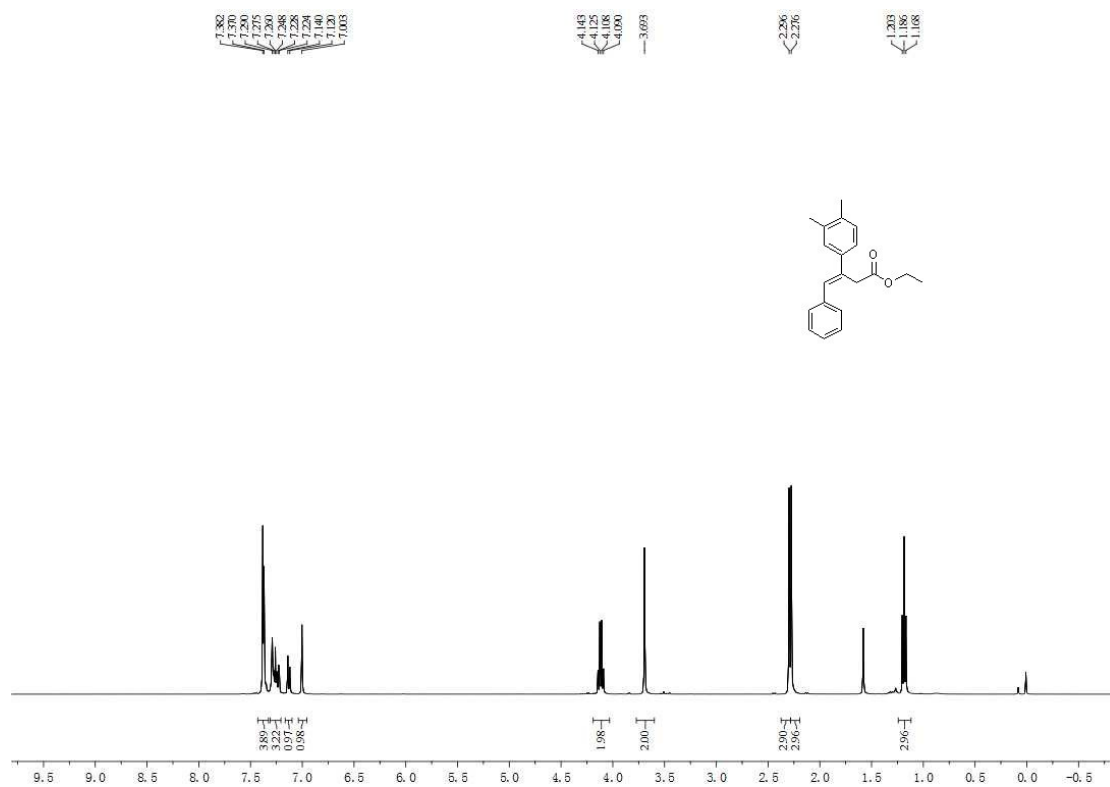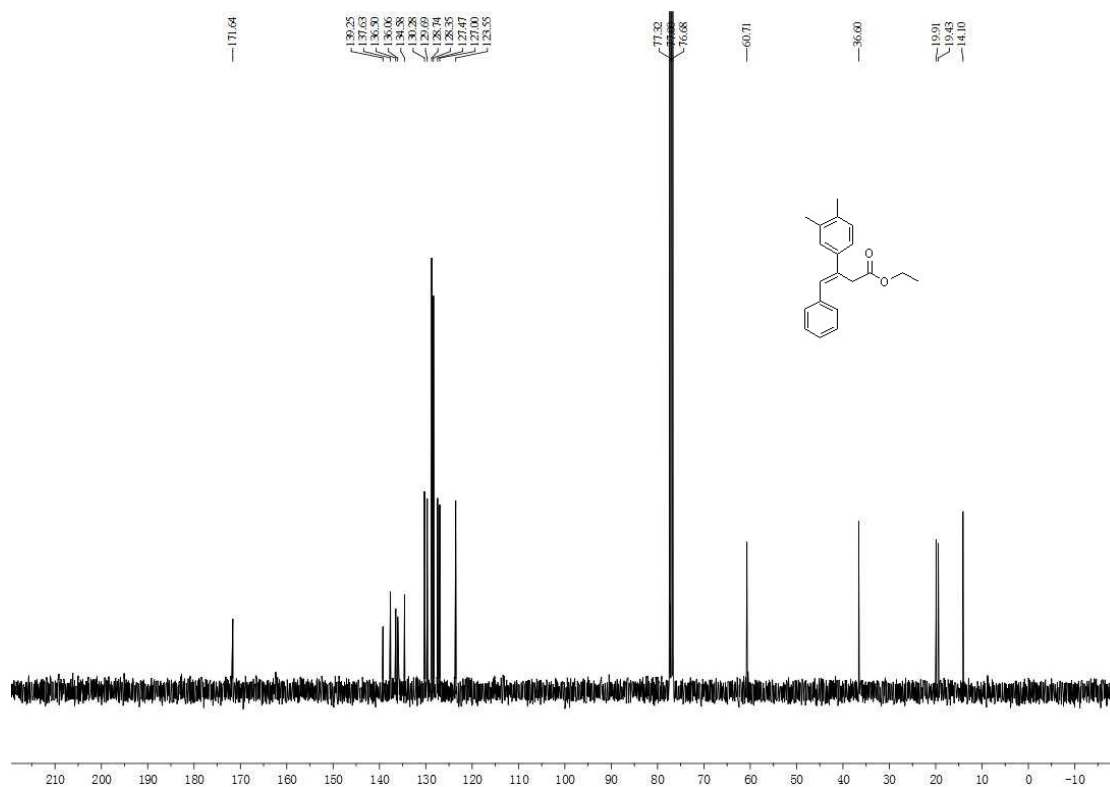

Product 5s

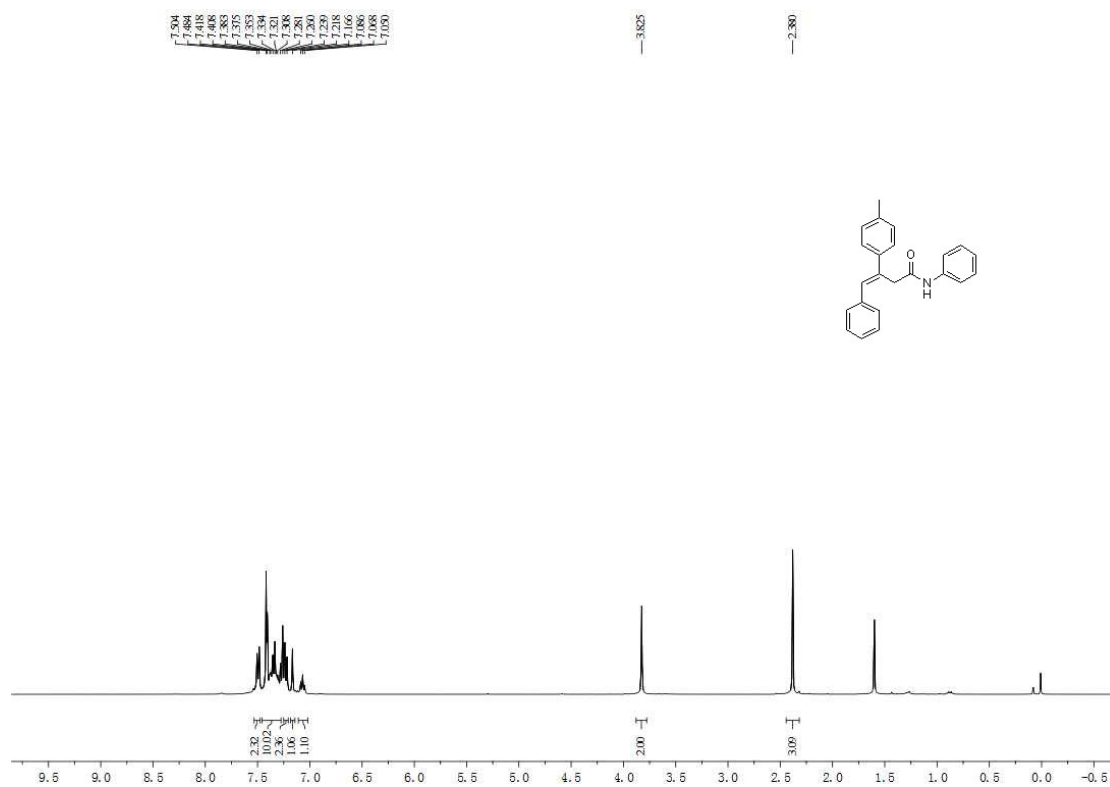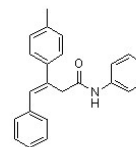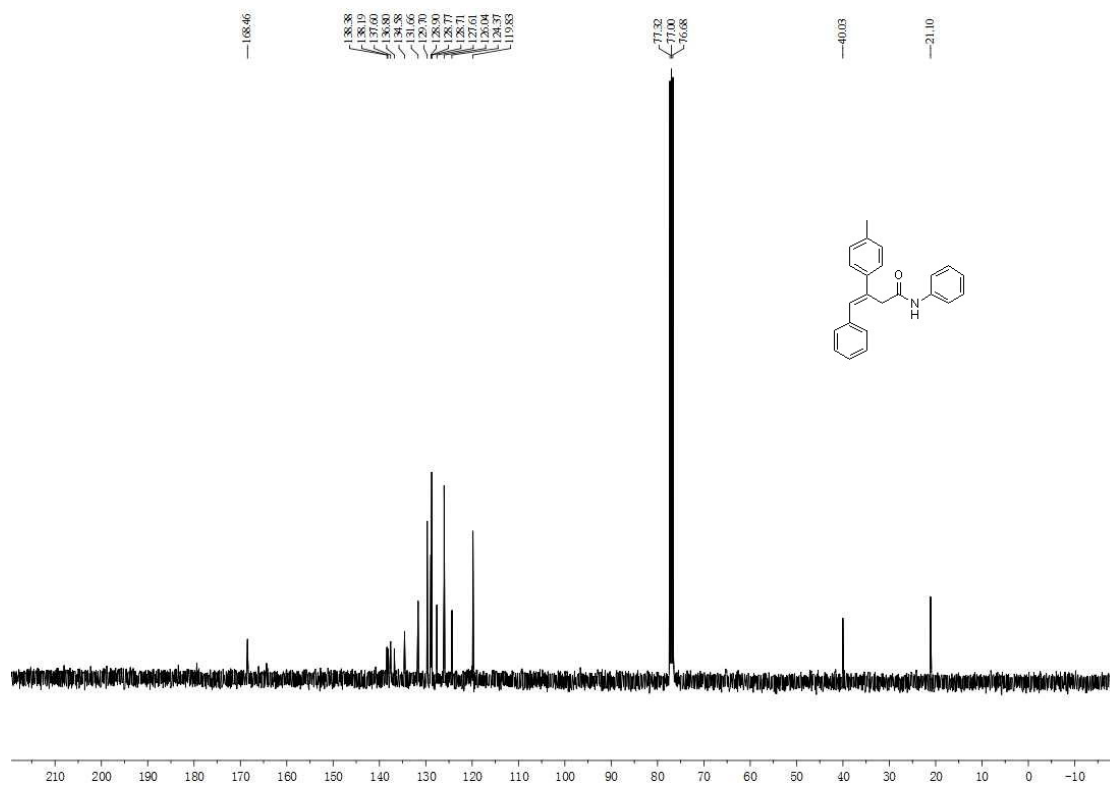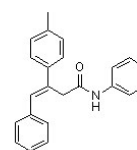



# Product 6

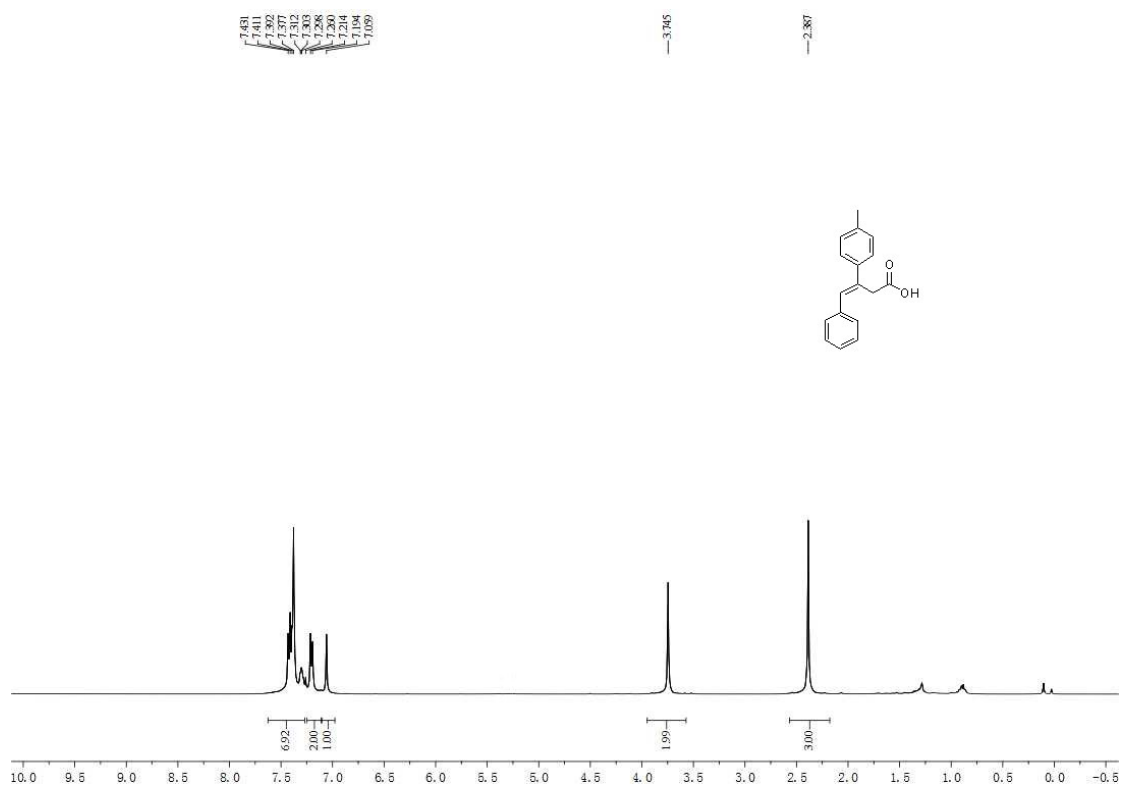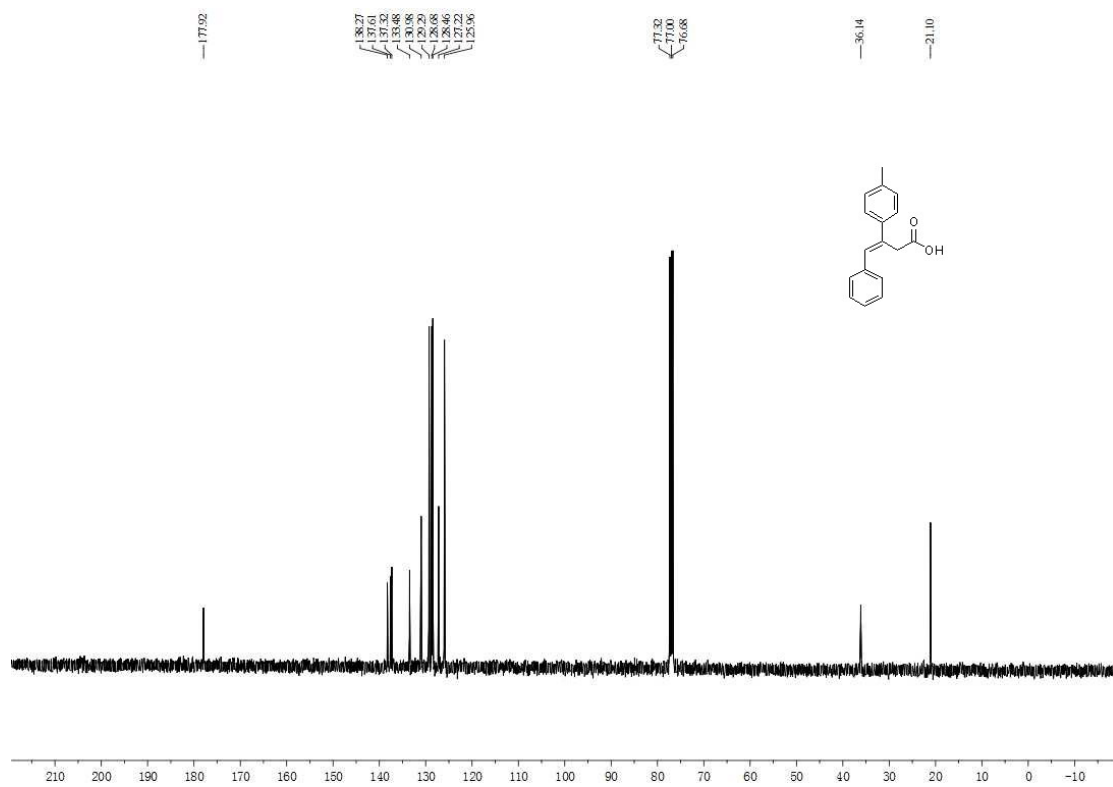

**Product 7a**

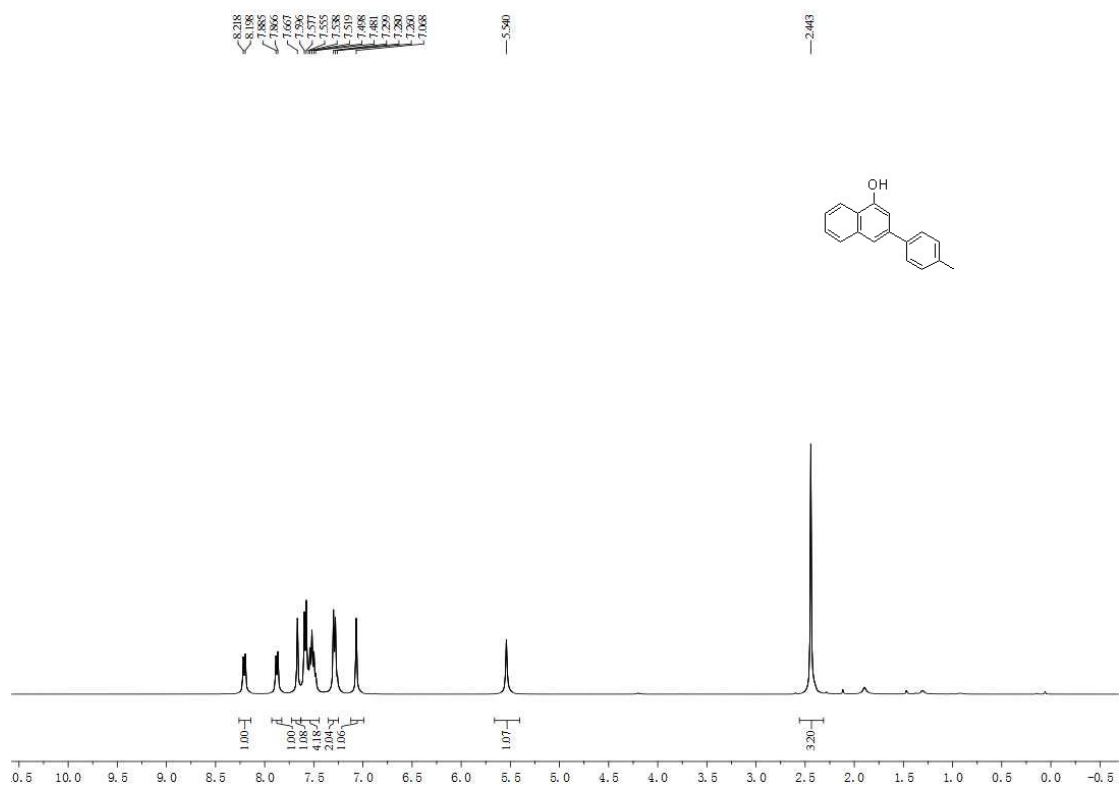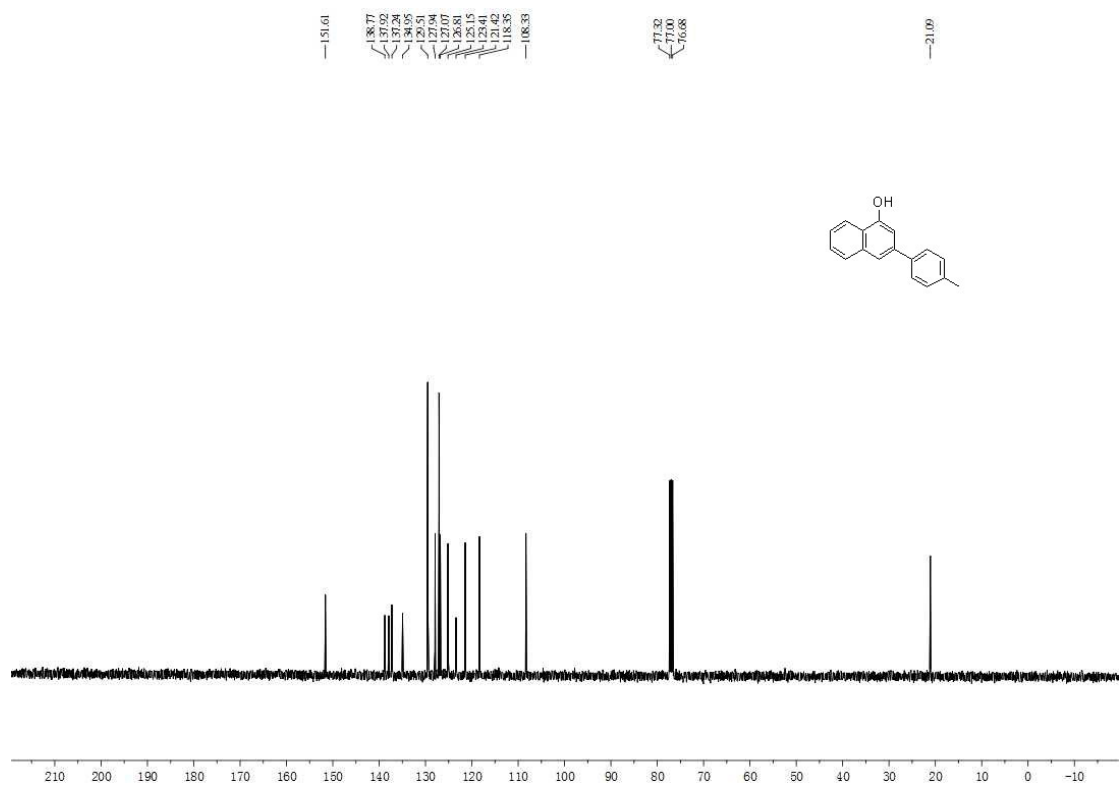

**Product 7b**

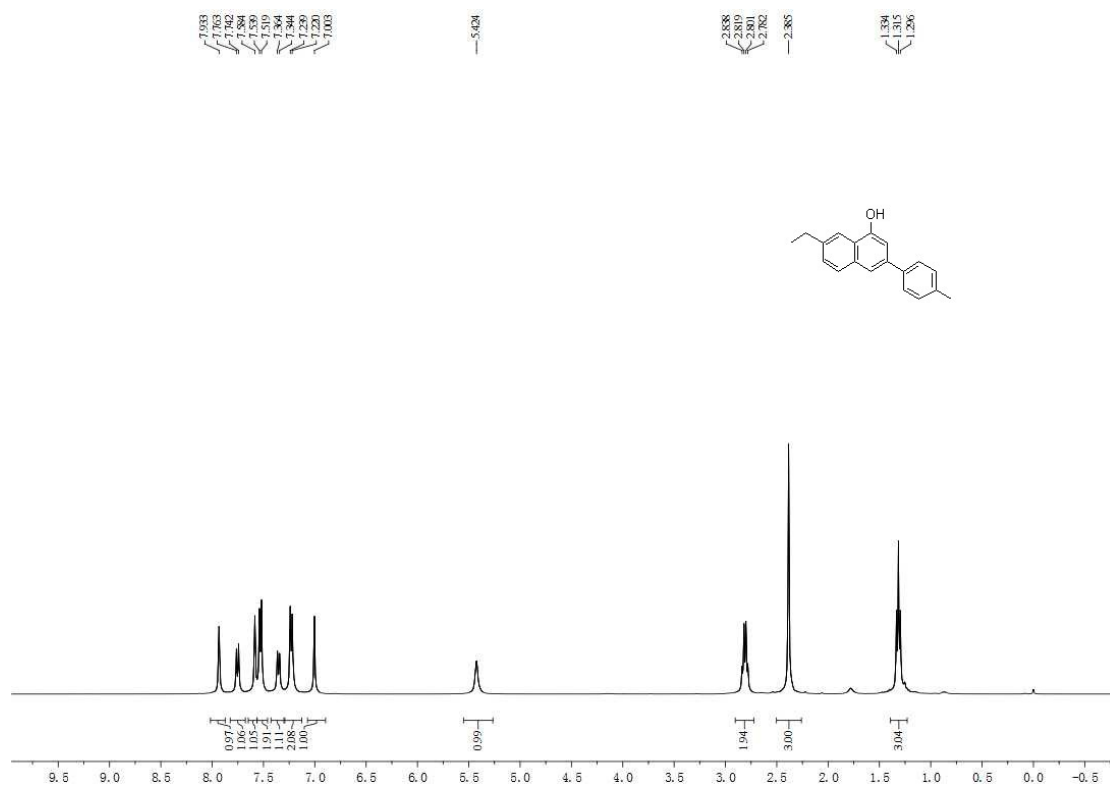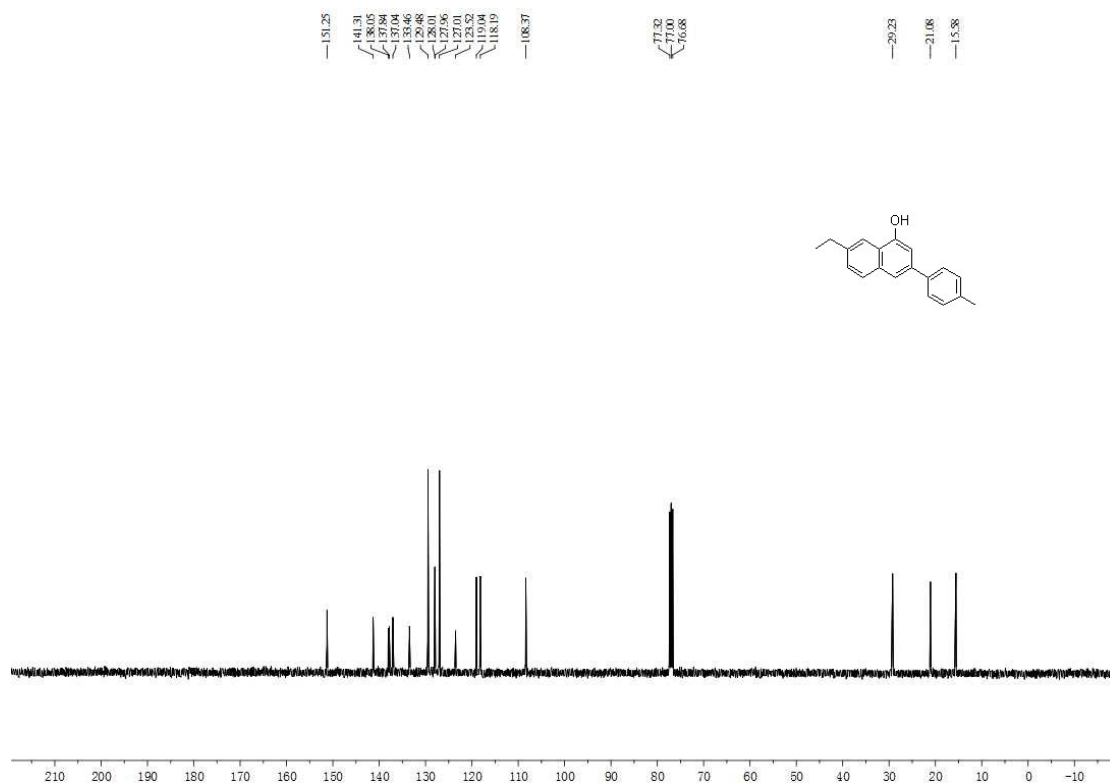

**Product 9**

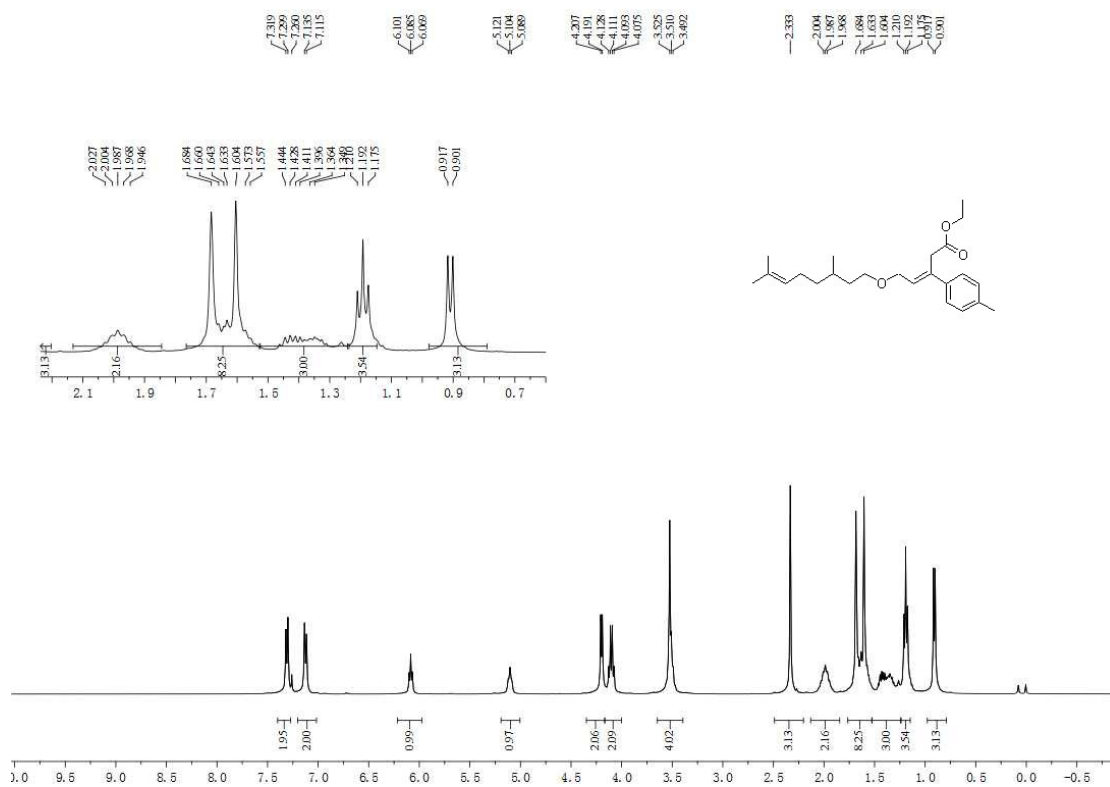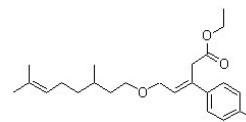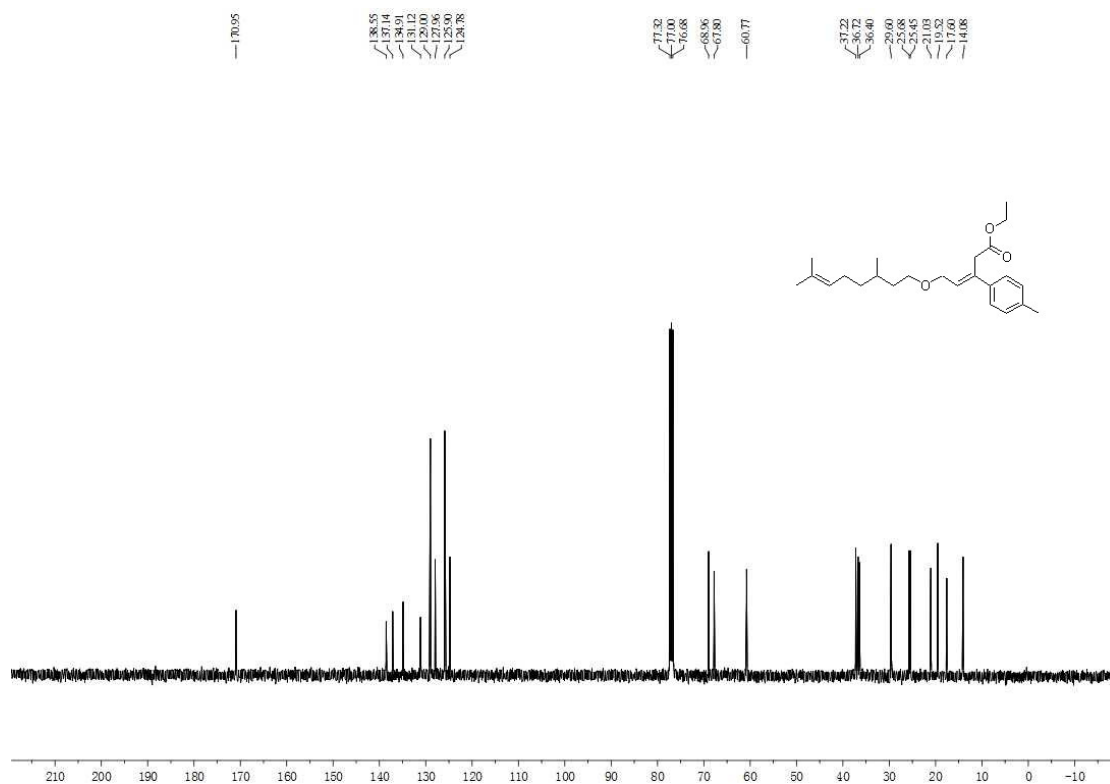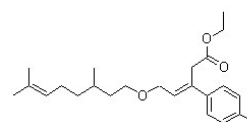

Supplement: c9cc07461a1.pdf [file c9cc07461a1.pdf]
